# Supplementary material for: Pd-catalysed intramolecular transformations of indolylbenzenesulfonamides: ortho-sulfonamido-bi(hetero)aryls via C2-arylation and polycyclic sultams via C3 arylation
Source: Royal Society of Chemistry journal article supplement (doi:10.1039/d2ob01610a), 2022-01-01
Supplement: d2ob01610a1.pdf [file d2ob01610a1.pdf]

## Supplementary data

**Pd-catalysed intramolecular transformations of indolylbenzenesulfonamides: *ortho*-sulfonamido-bi(hetero)aryls via C2-arylation and polycyclic sultams via C3 arylation**

*Rajnikanth Sunke,<sup>#</sup> Shabbir Ahmed Khan,<sup>#</sup> and K. C. Kumara Swamy\**

<sup>#</sup>Equal contribution

School of Chemistry, University of Hyderabad, Hyderabad 500 046, Telangana, India

e-mail: kckssc@uohyd.ac.in, [kckssc@yahoo.com](mailto:kckssc@yahoo.com)

| S. No | Contents                                                                                                                                                                                                                      | Page No.       |
|-------|-------------------------------------------------------------------------------------------------------------------------------------------------------------------------------------------------------------------------------|----------------|
| 1     | <b>Table S1:</b> Iodine mediated synthesis of Indolylbenzene/thiophene sulfonamides <b>3</b> and <b>6</b>                                                                                                                     | <b>S2-S7</b>   |
| 2     | X-ray data collection, solution, refinement and the ORTEPs/crystal data of <b>5aa</b> , <b>9ba</b> , <b>9bh</b> , <b>10al</b> , <b>10bk</b> and <b>12ag</b> (Figures S1-S6)                                                   | <b>S9-S11</b>  |
| 3     | <sup>1</sup> H and <sup>13</sup> C NMR spectra of all new compounds (Figures S7-S128)<br>[order: <b>5aa-5dg</b> ; <b>6aa-6ag</b> ; <b>7</b> ; <b>8</b> ; <b>9aa-9dg</b> ; <b>10aa-10dg</b> ; <b>11</b> and <b>12aa-12ag</b> ] | <b>S12-S72</b> |
| 4     | HRMS for <b>5af</b> , <b>9ae</b> , <b>9bi</b> , <b>12aa</b> and <b>12ad</b>                                                                                                                                                   | <b>S73-S77</b> |
| 5     | References                                                                                                                                                                                                                    | <b>S78</b>     |

**Table S1:** Iodine mediated synthesis of Indolyllbenzene/thiophene sulfonamides (**5**), (**6**), (**7**) and (**8**).<sup>a</sup>

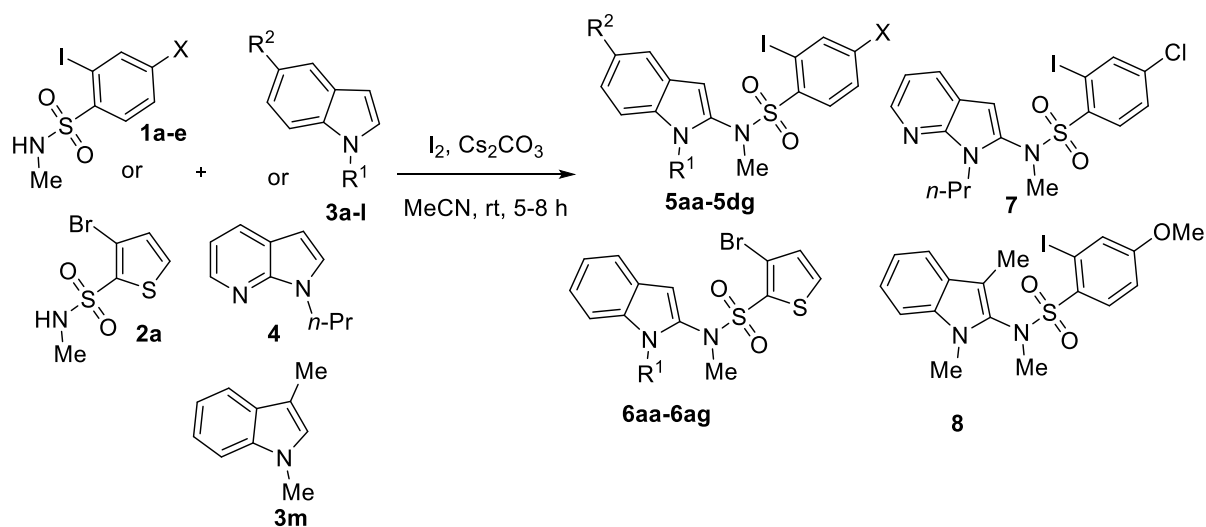

(i) *General Procedure for the preparation of 1, 2a, 3, and 4:* 2-Iodo substituted sulfonamides **1** were prepared according to the procedure described in literature.<sup>1</sup> The compound 3-bromo-*N*-methylthiophene-2-sulfonamide **2a** was prepared according to a procedure described in the literature.<sup>2</sup> Other starting materials **3** & **4** were prepared *via* alkylation, benzylation and allylation of the corresponding indoles according to a known procedure.<sup>3</sup>

(ii) *General procedure for the preparation of iodo-substituted indolyllbenzene/thiophene sulfonamides 5aa-5dg, 6aa-6ag, 7, and 8:* An oven dried 25 mL round-bottomed flask was charged with sulfonamide **1** (0.32 mmol), Cs<sub>2</sub>CO<sub>3</sub> (0.48 mmol) and I<sub>2</sub> (0.32 mmol) in acetonitrile (2.5 mL) added indole **3** (0.38 mmol). Then the mixture was stirred at rt (25 °C) under nitrogen for 5-8 h. After completion of the reaction (TLC), the reaction was quenched with a saturated solution of Na<sub>2</sub>S<sub>2</sub>O<sub>3</sub> (10 mL) and the mixture was treated with ethyl acetate (20 mL). The resulting solution was washed with water and the aqueous part extracted with ethyl acetate (2 x 20 mL). The combined organic layer was washed with saturated brine solution (2 x 20 mL), dried over anhydrous Na<sub>2</sub>SO<sub>4</sub>, and concentrated in vacuum. The

residue was then purified by using silica gel column chromatography using hexane-ethyl acetate (9:1) as eluent to afford the pure desired compounds **5**, **6**, **7** and **8**. Compounds **5aa-5dg**, **6aa-6ag**, **7** and **8** were prepared from the appropriate sulfonamide **1a-e**, **2a** and indole **3**, **4** by using the same procedure and the same molar quantities

| Entry | Sulfonamide                                                                                    | Indole                                                                                           | Time/h | Product                                                                                             | Yield <sup>b</sup> (%) |
|-------|------------------------------------------------------------------------------------------------|--------------------------------------------------------------------------------------------------|--------|-----------------------------------------------------------------------------------------------------|------------------------|
| 1     | 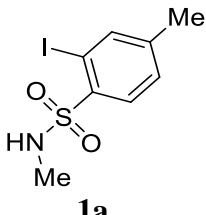<br><b>1a</b> | <br><b>3a</b>   | 5      | <br><b>5aa</b>    | 77                     |
| 2     | <b>1a</b>                                                                                      | <br><b>3b</b> | 6      | <br><b>5ab</b>   | 67                     |
| 3     | <b>1a</b>                                                                                      | <br><b>3c</b> | 5      | <br><b>5ac</b> | 70                     |
| 4     | <b>1a</b>                                                                                      | <br><b>3d</b> | 7      | <br><b>5ad</b>  | 72                     |

|   |    |                                                                                               |   |                                                                                                 |    |
|---|----|-----------------------------------------------------------------------------------------------|---|-------------------------------------------------------------------------------------------------|----|
| 5 | 1a | 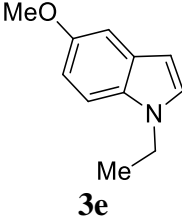 <p>3e</p>   | 6 |  <p>5ae</p>   | 70 |
| 6 | 1a |  <p>3f</p>   | 5 |  <p>5af</p>   | 67 |
| 7 | 1a |  <p>3h</p> | 7 |  <p>5ah</p> | 82 |
| 8 | 1a |  <p>3i</p> | 6 |  <p>5ai</p> | 81 |
| 9 | 1a |  <p>3j</p> | 6 |  <p>5aj</p> | 77 |

|    |                                                                                                |                                                                                                |   |                                                                                                     |    |
|----|------------------------------------------------------------------------------------------------|------------------------------------------------------------------------------------------------|---|-----------------------------------------------------------------------------------------------------|----|
| 10 | <b>1a</b>                                                                                      | 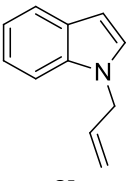<br><b>3l</b> | 7 | <br><b>5al</b>   | 62 |
| 11 | <br><b>1b</b> | <b>3a</b>                                                                                      | 7 | <br><b>5ba</b>   | 83 |
| 12 | <b>1b</b>                                                                                      | <b>3d</b>                                                                                      | 7 | <br><b>5bd</b>  | 71 |
| 13 | <b>1b</b>                                                                                      | <b>3e</b>                                                                                      | 6 | <br><b>5be</b> | 77 |
| 14 | <b>1b</b>                                                                                      | <b>3h</b>                                                                                      | 6 | <br><b>5bh</b> | 83 |

|    |                                                                                                  |                                                                                                  |   |                                                                                                     |    |
|----|--------------------------------------------------------------------------------------------------|--------------------------------------------------------------------------------------------------|---|-----------------------------------------------------------------------------------------------------|----|
| 15 | <b>1b</b>                                                                                        | <b>3i</b>                                                                                        | 7 | 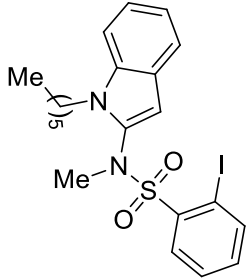<br><b>5bi</b>   | 79 |
| 16 | <b>1b</b>                                                                                        | <b>3j</b>                                                                                        | 6 | <br><b>5bj</b>   | 76 |
| 17 | <b>1b</b>                                                                                        | <br><b>3k</b>  | 5 | <br><b>5bk</b>  | 70 |
| 18 | <br><b>1c</b> | <b>3d</b>                                                                                        | 6 | <br><b>5cd</b> | 72 |
| 19 | <b>1c</b>                                                                                        | <br><b>3g</b> | 7 | <br><b>5cg</b>  | 67 |

|    |                                                                                                      |           |   |                                                                                                         |    |
|----|------------------------------------------------------------------------------------------------------|-----------|---|---------------------------------------------------------------------------------------------------------|----|
| 20 | 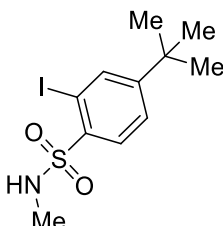 <p><b>1d</b></p>   | <b>3d</b> | 7 |  <p><b>5dd</b></p>    | 48 |
| 21 | <b>1d</b>                                                                                            | <b>3g</b> | 7 |  <p><b>5dg</b></p>   | 60 |
| 22 |  <p><b>2a</b></p> | <b>3a</b> |   |  <p><b>6aa</b></p>  | 82 |
| 23 | <b>2a</b>                                                                                            | <b>3d</b> | 8 |  <p><b>6ad</b></p> | 73 |
| 24 | <b>2a</b>                                                                                            | <b>3g</b> | 8 |  <p><b>6ag</b></p> | 80 |

|    |                                                                                                |                                                                                                |   |                                                                                                |    |
|----|------------------------------------------------------------------------------------------------|------------------------------------------------------------------------------------------------|---|------------------------------------------------------------------------------------------------|----|
| 25 | <b>1c</b>                                                                                      | <b>4</b>                                                                                       | 8 | 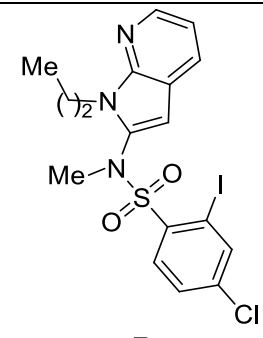<br><b>7</b> | 68 |
| 26 | <br><b>1e</b> | <br><b>3m</b> | 8 | <br><b>8</b> | 70 |

<sup>a</sup>All the reactions were carried out using **1** (0.32 mmol), **2** (0.38 mmol), I<sub>2</sub> (0.32 mmol) and Cs<sub>2</sub>CO<sub>3</sub> (0.48 mmol) in acetonitrile (5.0 mL), at rt (25 °C) under nitrogen atmosphere.

<sup>b</sup>Isolated yield.

### 1. X-ray data collection, solution, refinement and the ORTEPs/crystal data:

Single crystal X-ray data for crystals of compounds **5aa**, **9ba**, **9bh**, **10al**, **10bk** and **12ag** were collected on an X-ray diffractometer using Mo-K<sub>α</sub> (λ = 0.71073 Å) radiation after mounting on glass fibers inside a brass pin in open air. The structures were solved by direct methods and refined by full-matrix least squares method using standard procedures; absorption corrections were done using SADABS program, where applicable [(a) Sheldrick, G. M. *SADABS, Siemens Area Detector Absorption Correction*, University of Gottingen, Germany, **1996**. (b) Sheldrick, G. M. *SHELX-97-A program for crystal structure solution and refinement*, University of Gottingen, **1997**. (c) Sheldrick, G. M. *SHELXTL NT Crystal Structure Analysis Package*, Bruker AXS, Analytical X-ray System, WI, USA, **1999**, version 5.10]. In general, all non-hydrogen atoms were refined anisotropically; hydrogen atoms were fixed by geometry or located by a Difference Fourier map and refined isotropically.



**ORTEPs and crystal data of 5aa, 9ba, 9bh, 10al, 10bk and 12ag (Figures S1-S6)**

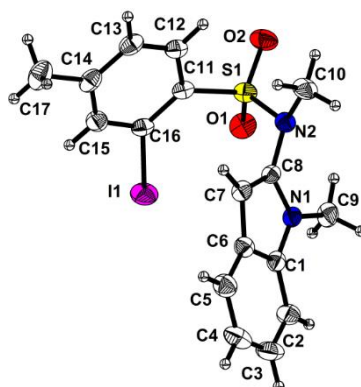

**Figure S1.** ORTEP of **5aa** with 30% probability of ellipsoids: **Crystal data:**  $C_{17}H_{17}IN_2O_2S$ ,  $M = 440.29$ , Monoclinic, Space group  $P2_1/c$ ,  $a = 6.2737(4)$ ,  $b = 18.0774(6)$ ,  $c = 16.6031(8)$  Å,  $V = 1734.91(15)$  Å<sup>3</sup>,  $\beta = 112.875(8)^\circ$ ,  $Z = 4$ ,  $\mu = 1.976$  mm<sup>-1</sup>, data/restraints/parameters: 2513/0/212, R indices ( $I > 2\sigma(I)$ ):  $R1 = 0.0405$ ,  $wR2$  (all data) = 0.1204. CCDC No: 2202000

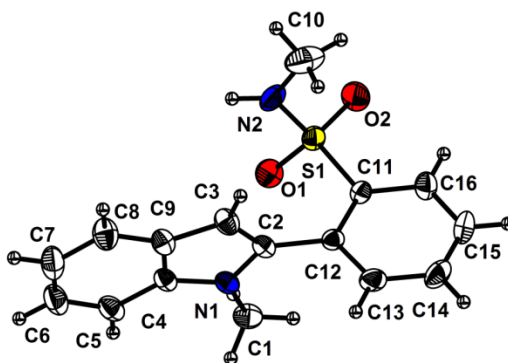

**Figure S2.** ORTEP of **9ba** with 30% probability of ellipsoids: **Crystal data:**  $C_{16}H_{16}N_2O_2S$ ,  $M = 300.37$ , Monoclinic, Space group  $P2_1/n$ ,  $a = 11.6333(5)$ ,  $b = 11.3408(5)$ ,  $c = 11.7715(5)$  Å,  $V = 1523.13(11)$  Å<sup>3</sup>,  $\beta = 101.2610(19)^\circ$ ,  $Z = 4$ ,  $\mu = 0.218$  mm<sup>-1</sup>, data/restraints/parameters: 2683/0/193, R indices ( $I > 2\sigma(I)$ ):  $R1 = 0.0464$ ,  $wR2$  (all data) = 0.1128. CCDC No: 2202001

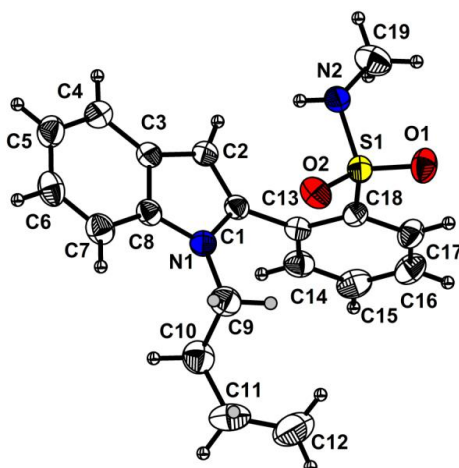

**Figure S3.** ORTEP of **9bh** with 30% probability of ellipsoids: *Crystal data:*  $C_{19}H_{22}N_2O_2S$ ,  $M = 342.44$ , Triclinic, Space group  $P-1$ ,  $a = 8.4303(4)$ ,  $b = 10.1352(5)$ ,  $c = 11.2583(4)$  Å,  $V = 899.57(7)$  Å<sup>3</sup>,  $\alpha = 80.979(4)^\circ$ ,  $\beta = 71.424(4)^\circ$ ,  $\gamma = 89.642(4)^\circ$ ,  $Z = 2$ ,  $\mu = 0.193$  mm<sup>-1</sup>, data/restraints/parameters: 3131/0/224, R indices ( $I > 2\sigma(I)$ ):  $R1 = 0.0532$ ,  $wR2$  (all data) = 0.1620. CCDC No: 2202002

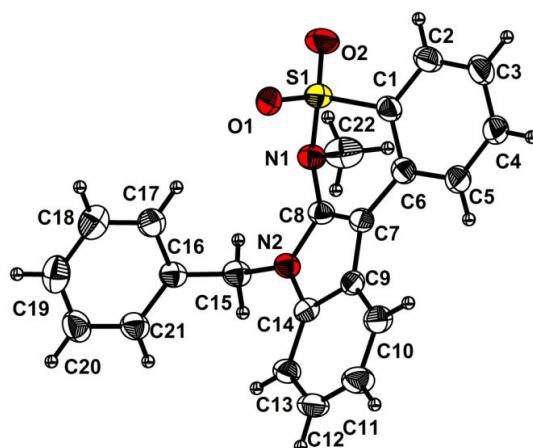

**Figure S4.** ORTEP of **10al** with 30% probability of ellipsoids: *Crystal data:*  $C_{22}H_{18}N_2O_2S$ ,  $M = 374.44$ , Monoclinic, Space group  $P121/n1$ ,  $a = 9.2441(3)$ ,  $b = 9.3416(3)$ ,  $c = 21.8748(6)$  Å,  $V = 1884.83(10)$  Å<sup>3</sup>,  $\beta = 93.805(3)^\circ$ ,  $Z = 4$ ,  $\mu = 0.191$  mm<sup>-1</sup>, data/restraints/parameters: 3312/0/246, R indices ( $I > 2\sigma(I)$ ):  $R1 = 0.0535$ ,  $wR2$  (all data) = 0.1430. CCDC No: 2202003

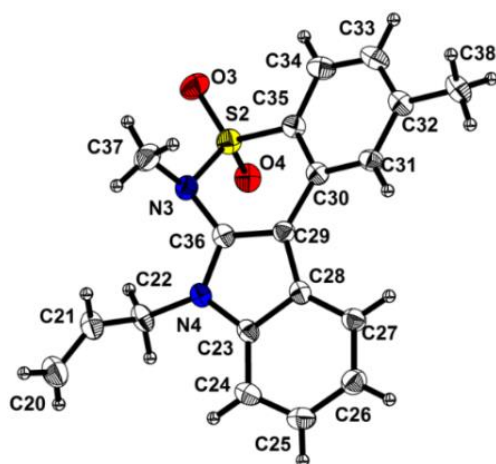

**Figure S5.** ORTEP of **10bk** with 30% probability of ellipsoids: *Crystal data:* C<sub>19</sub>H<sub>18</sub>N<sub>2</sub>O<sub>2</sub>S, *M* = 338.41, Orthorhombic, Space group *Pna2(1)*, *a* = 37.1188(12), *b* = 7.4217(2), *c* = 11.9822(5) Å, *V* = 3300.9(2) Å<sup>3</sup>, *Z* = 8,  $\mu$  = 0.210 mm<sup>-1</sup>, data/restraints/parameters: 5529/1/438, R indices (*I* > 2 $\sigma$ (*I*)): R1 = 0.0578, *w*R2 (all data) = 0.1464. CCDC No: 2202004

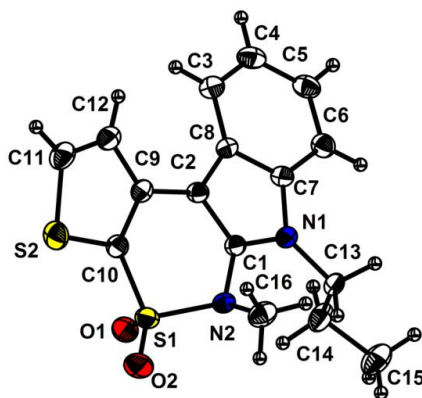

**Figure S6.** ORTEP view of **12ag** with 30% probability of ellipsoids. *Crystal data:* C<sub>16</sub>H<sub>16</sub>N<sub>2</sub>O<sub>2</sub>S<sub>2</sub>, *M* = 332.43, Monoclinic, Space group *P121/n1*, *a* = 10.3674(4), *b* = 7.8969(3), *c* = 19.6001(8) Å, *V* = 1568.26(11) Å<sup>3</sup>,  $\alpha$  = 90°,  $\beta$  = 102.228(4)°,  $\gamma$  = 90°, *Z* = 4,  $\mu$  = 0.347 mm<sup>-1</sup>, data/restraints/parameters: 2772/0/202, R indices (*I* > 2 $\sigma$ (*I*)): R1 = 0.0492, *w*R2 (all data) = 0.1387. CCDC No: 2202005.

## 2. $^1\text{H}$ and $^{13}\text{C}\{^1\text{H}\}$ NMR spectra of all new compounds

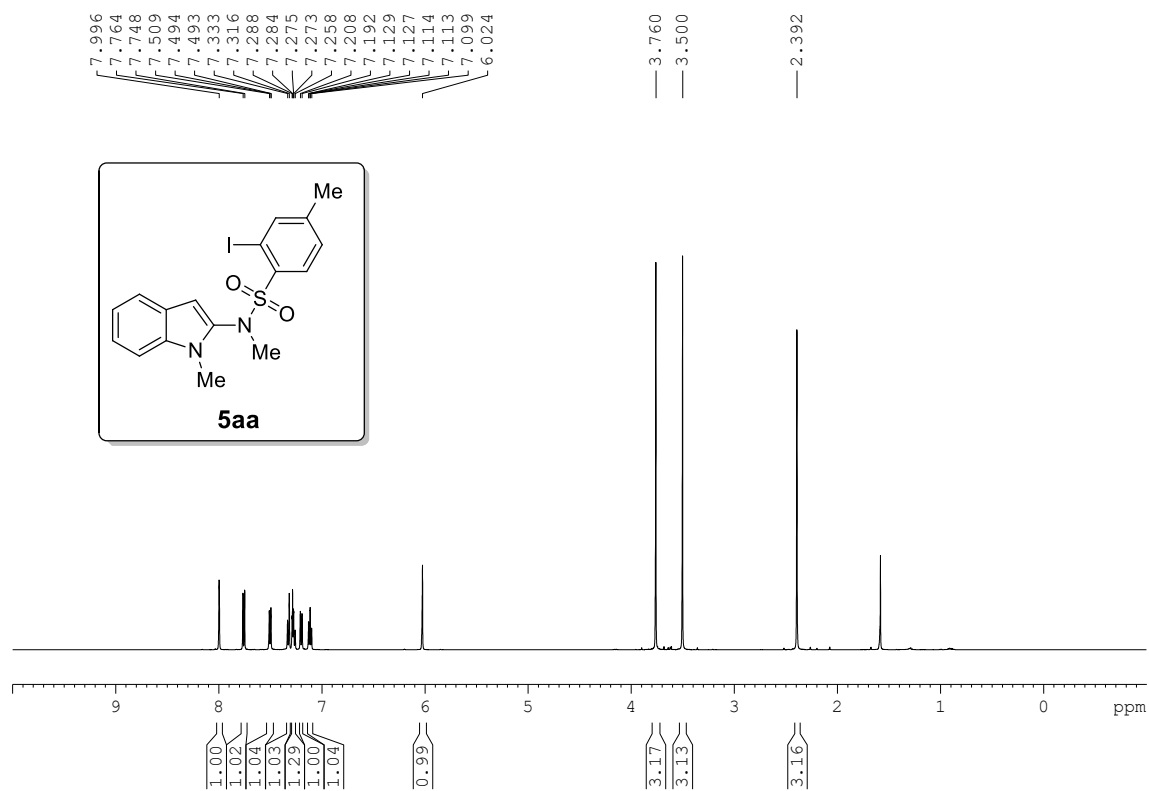

Figure S7.  $^1\text{H}$  NMR spectrum of compound **5aa**

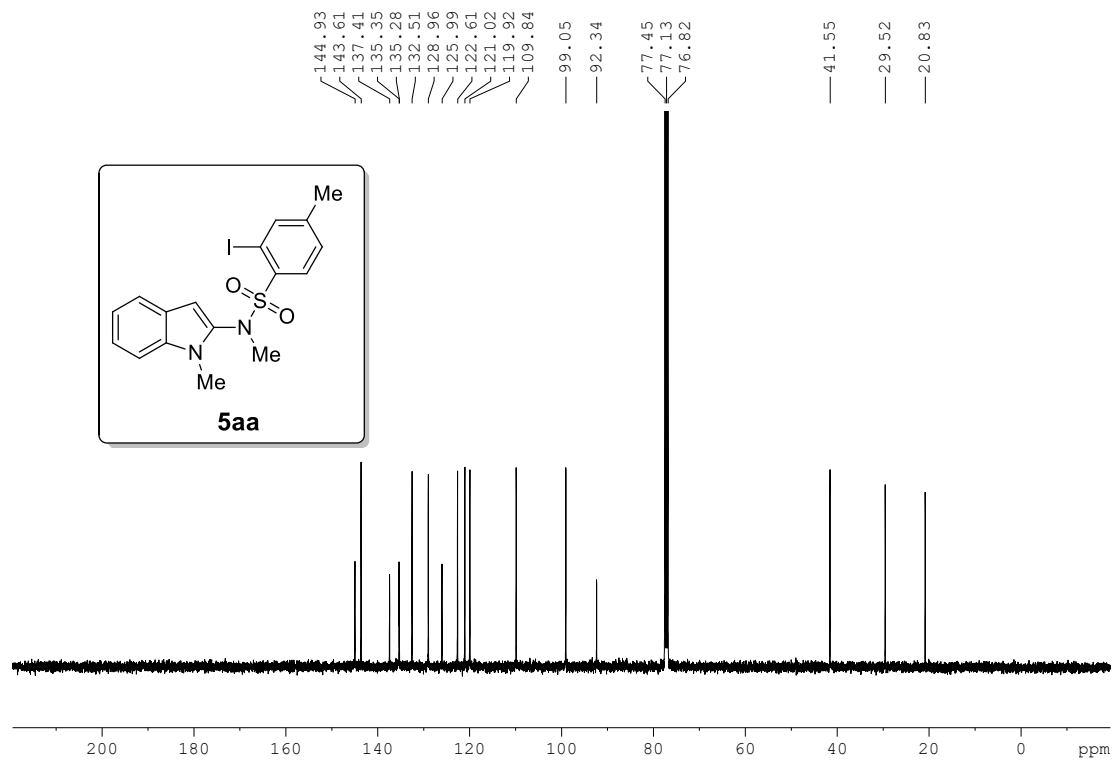

Figure S8.  $^{13}\text{C}\{^1\text{H}\}$  NMR spectrum of compound **5aa**

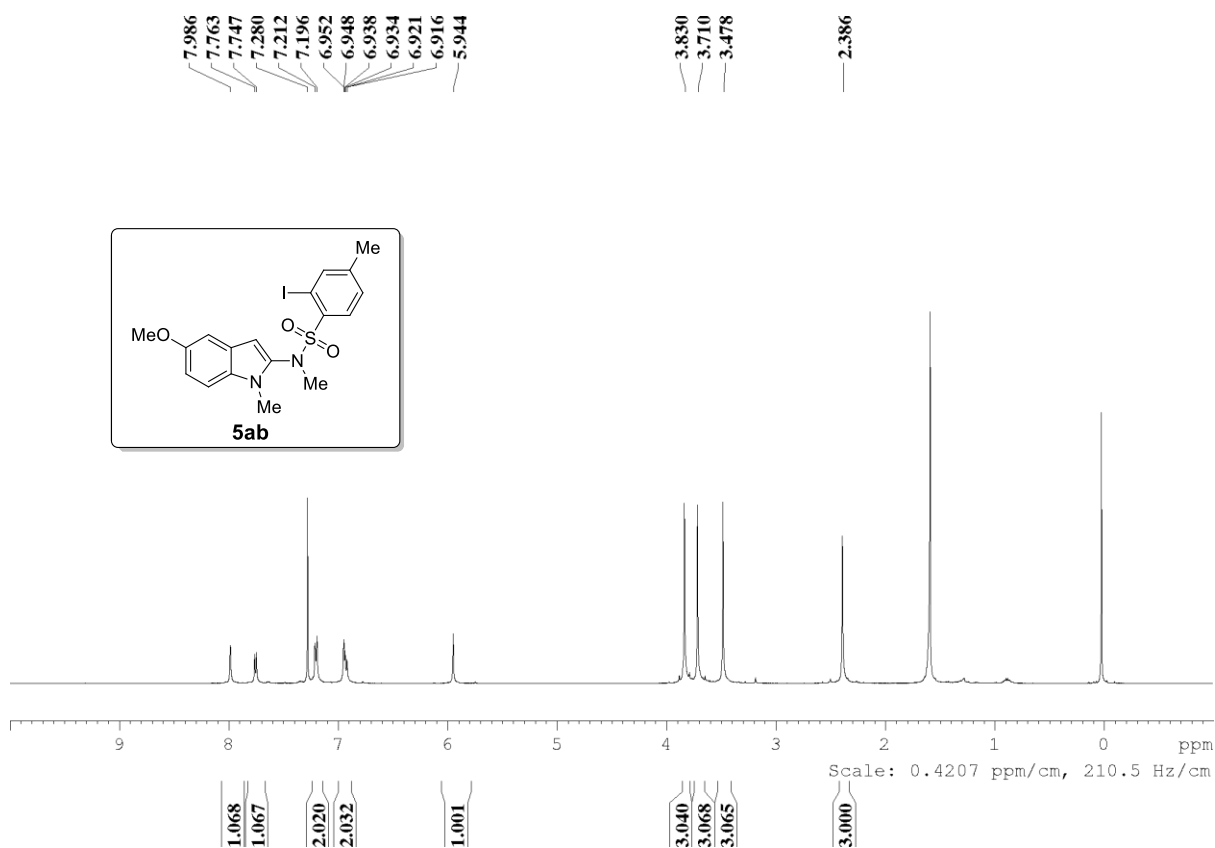

**Figure S9.**  $^1\text{H NMR}$  spectrum of compound **5ab**

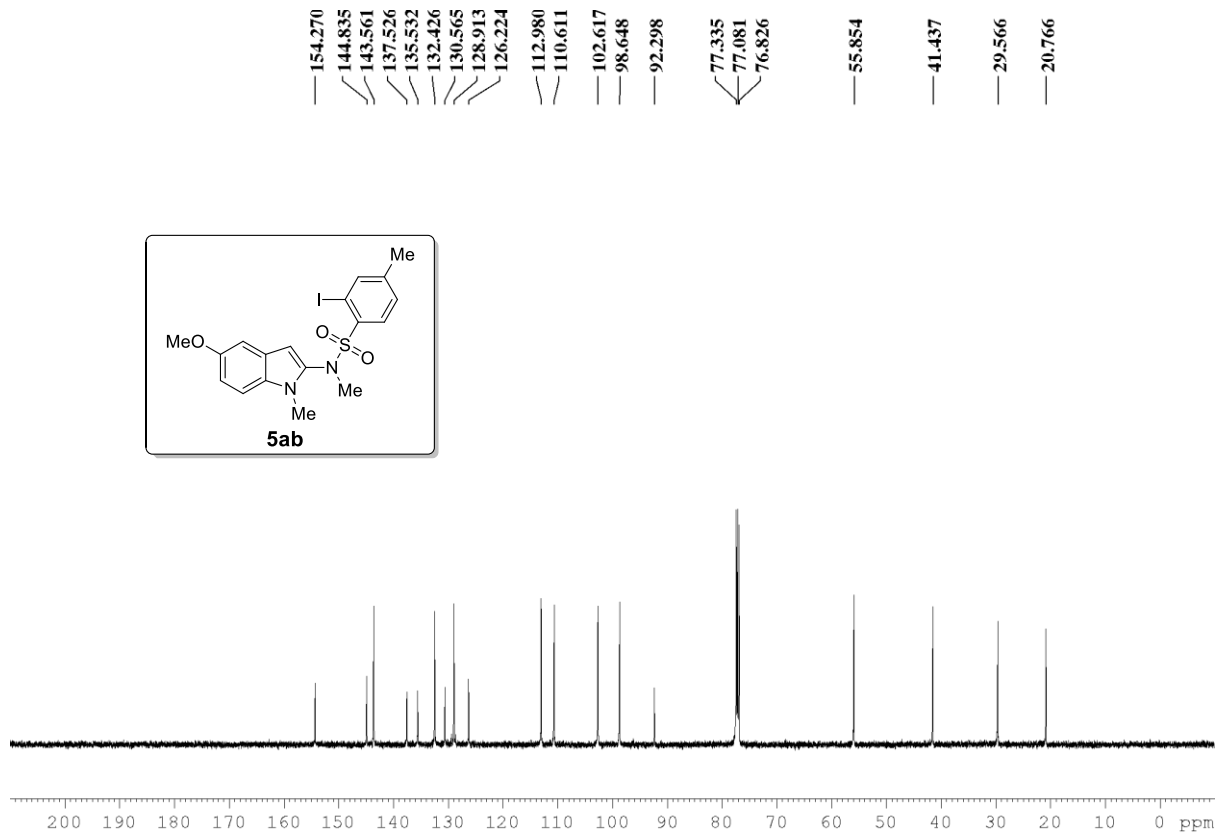

**Figure S10.**  $^{13}\text{C}\{^1\text{H}\}$  NMR spectrum of compound **5ab**

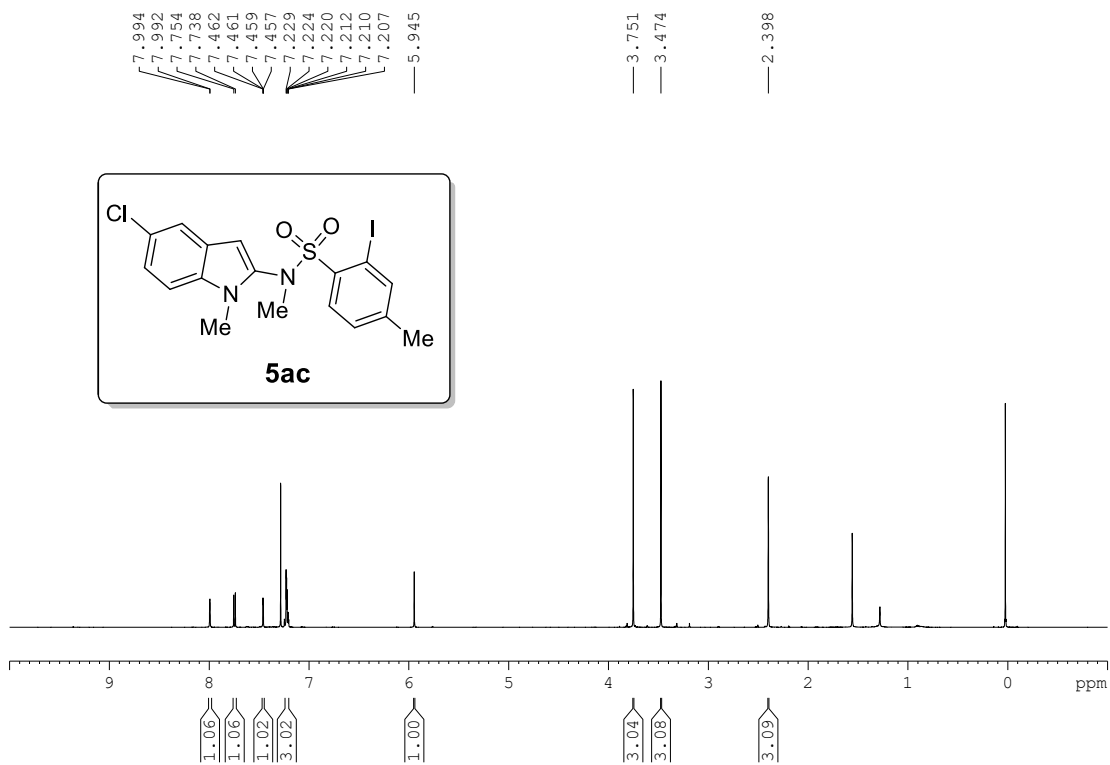

**Figure S11.**  $^1\text{H}$  NMR spectrum of compound **5ac**

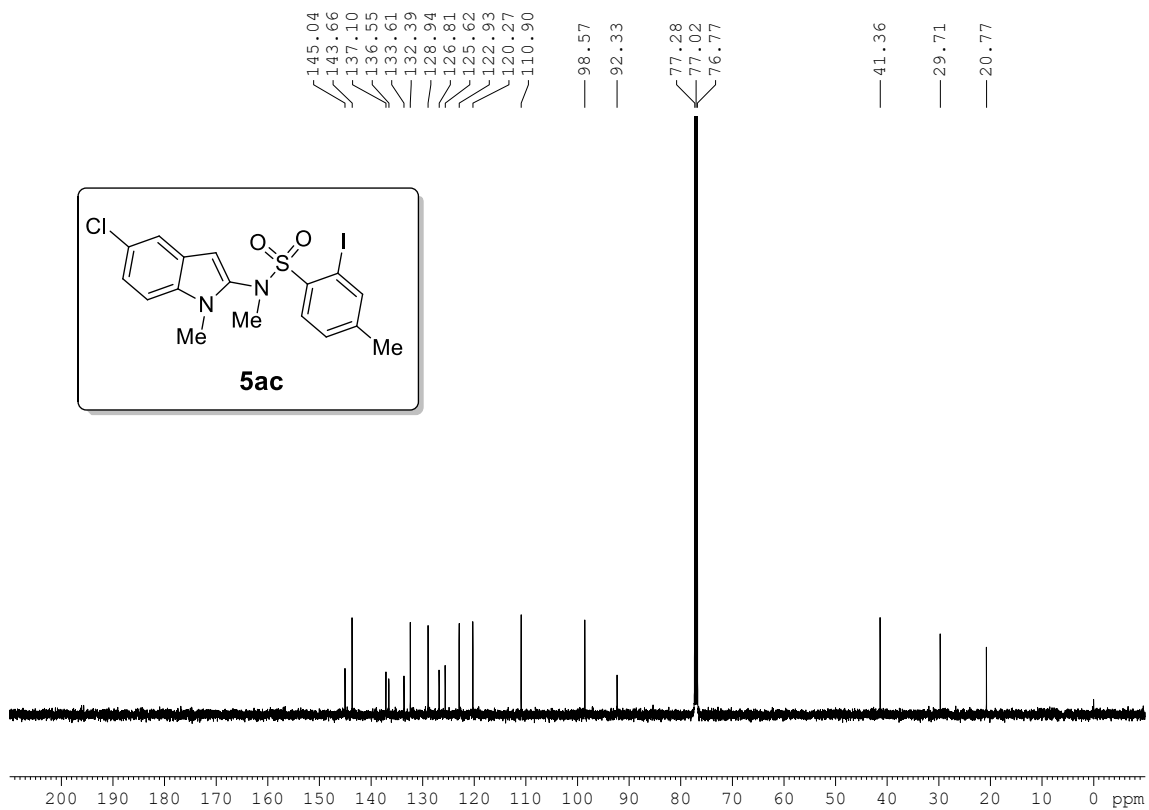

**Figure S12.**  $^{13}\text{C}\{^1\text{H}\}$  NMR spectrum of compound **5ac**

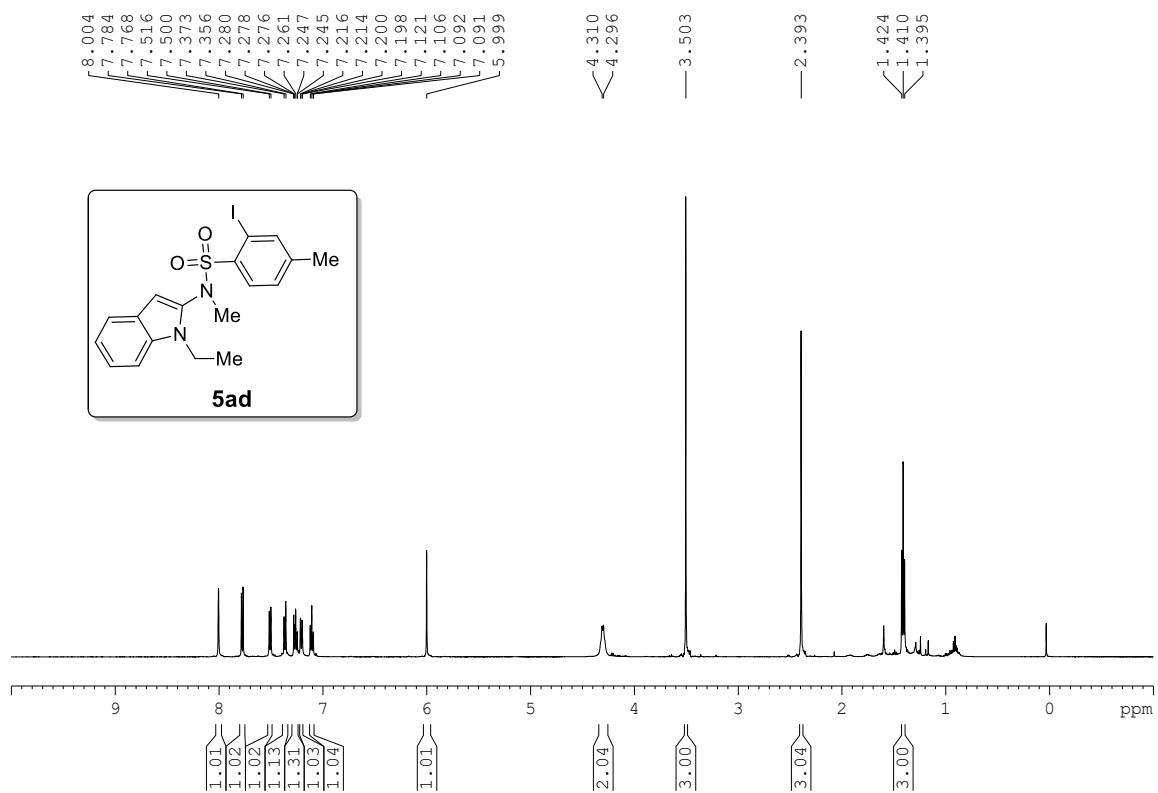

**Figure S13.** <sup>1</sup>H NMR spectrum of compound **5ad**

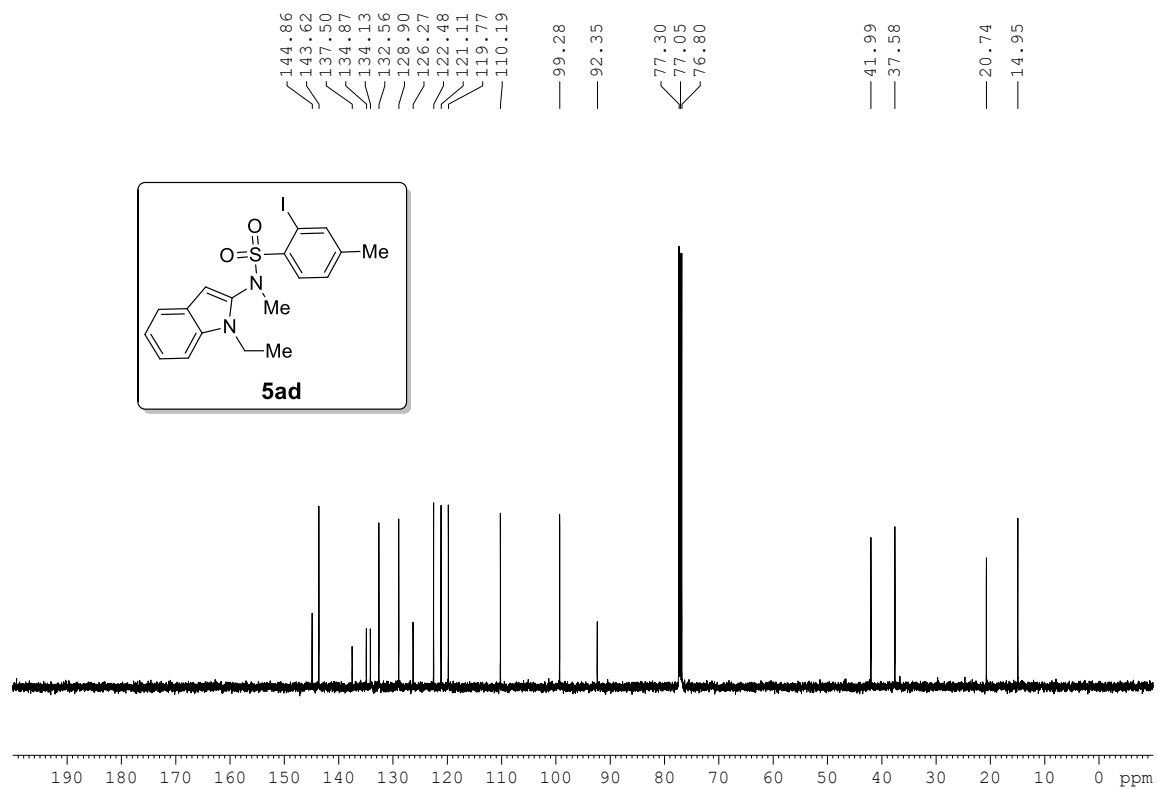

**Figure S14.** <sup>13</sup>C {<sup>1</sup>H} NMR spectrum of compound **5ad**

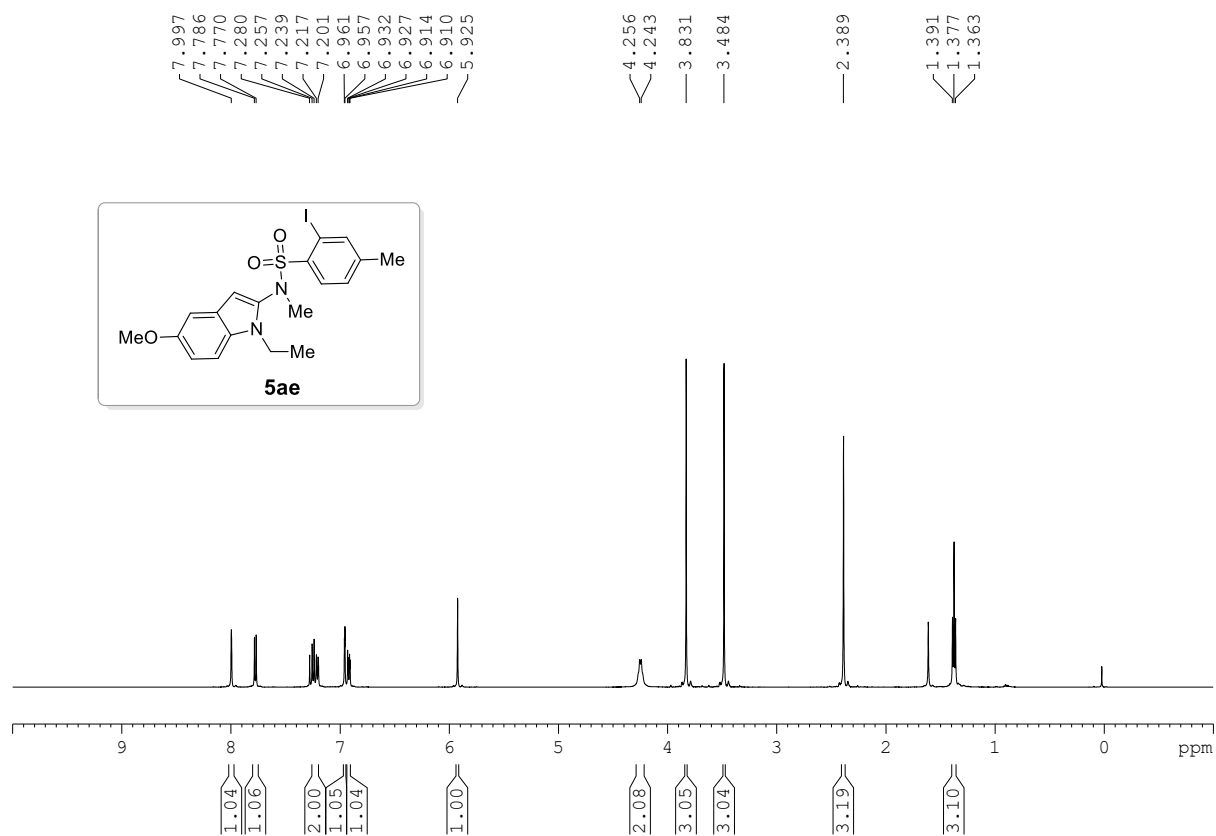

**Figure S15.** <sup>1</sup>H NMR spectrum of compound **5ae**

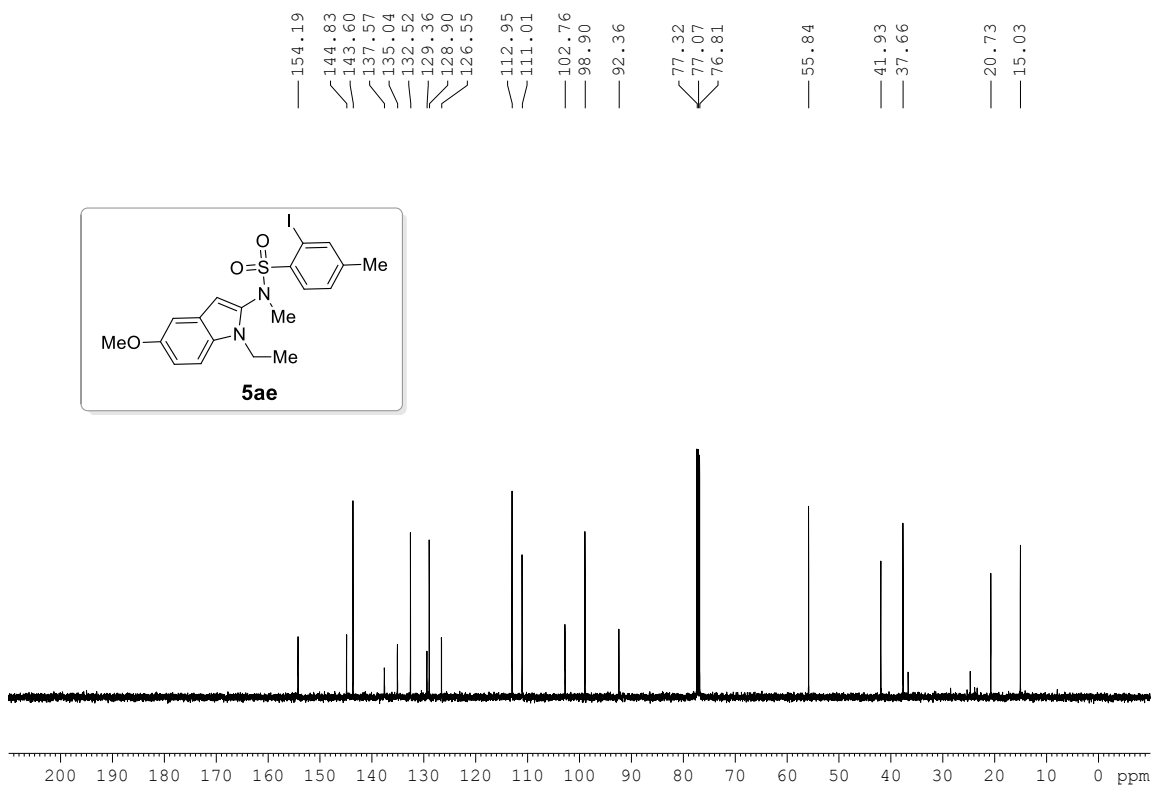

**Figure S16.** <sup>13</sup>C {<sup>1</sup>H} NMR spectrum of compound **5ae**



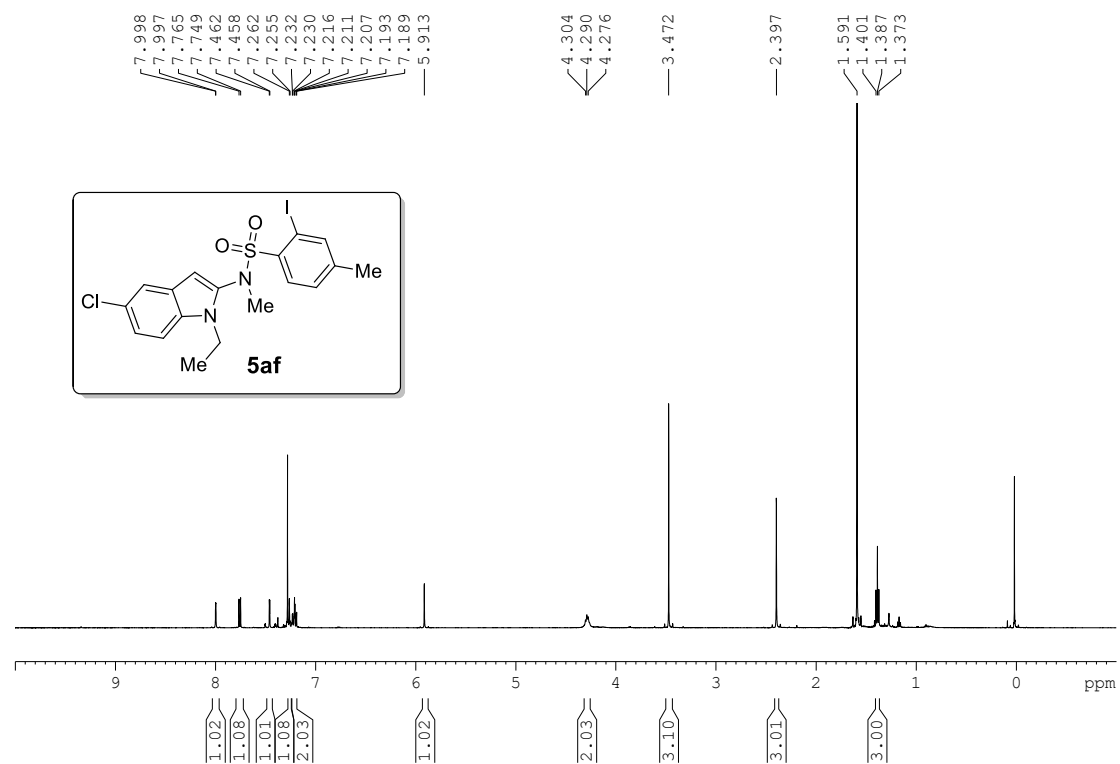

**Figure S17.** <sup>1</sup>H NMR spectrum of compound **5af**

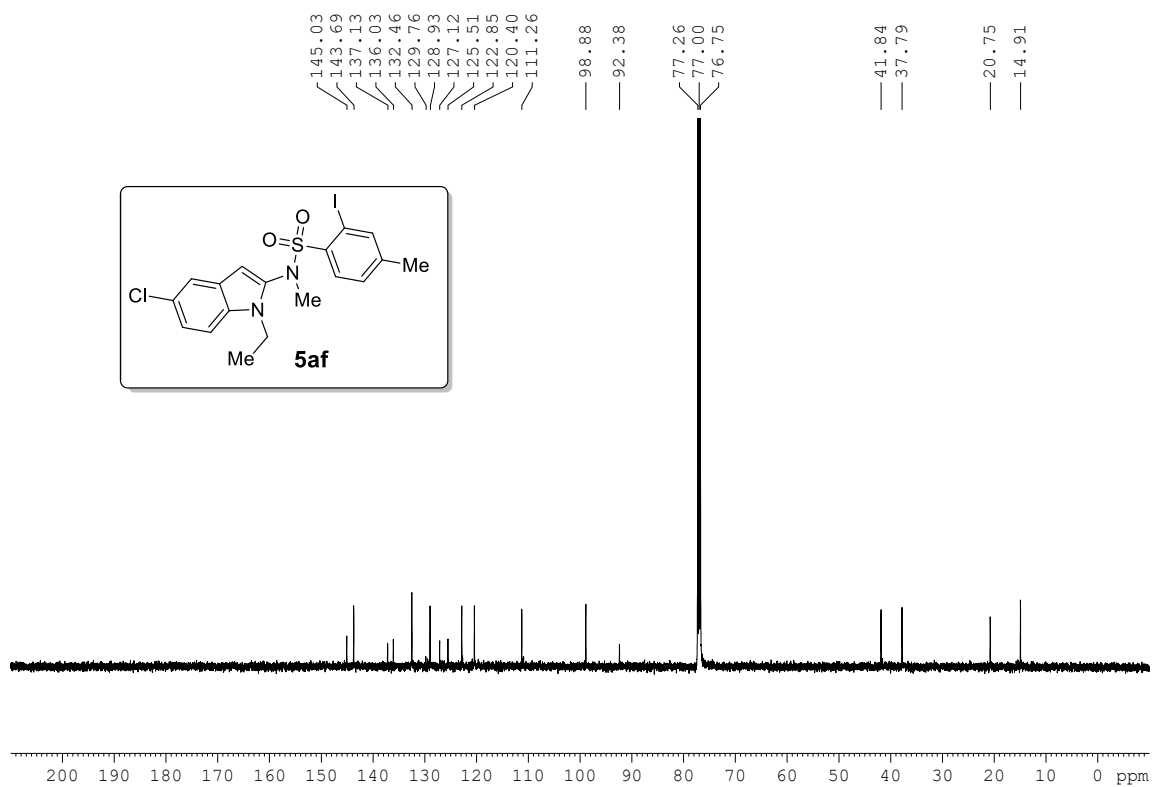

**Figure S18.** <sup>13</sup>C{<sup>1</sup>H} NMR spectrum of compound **5af**

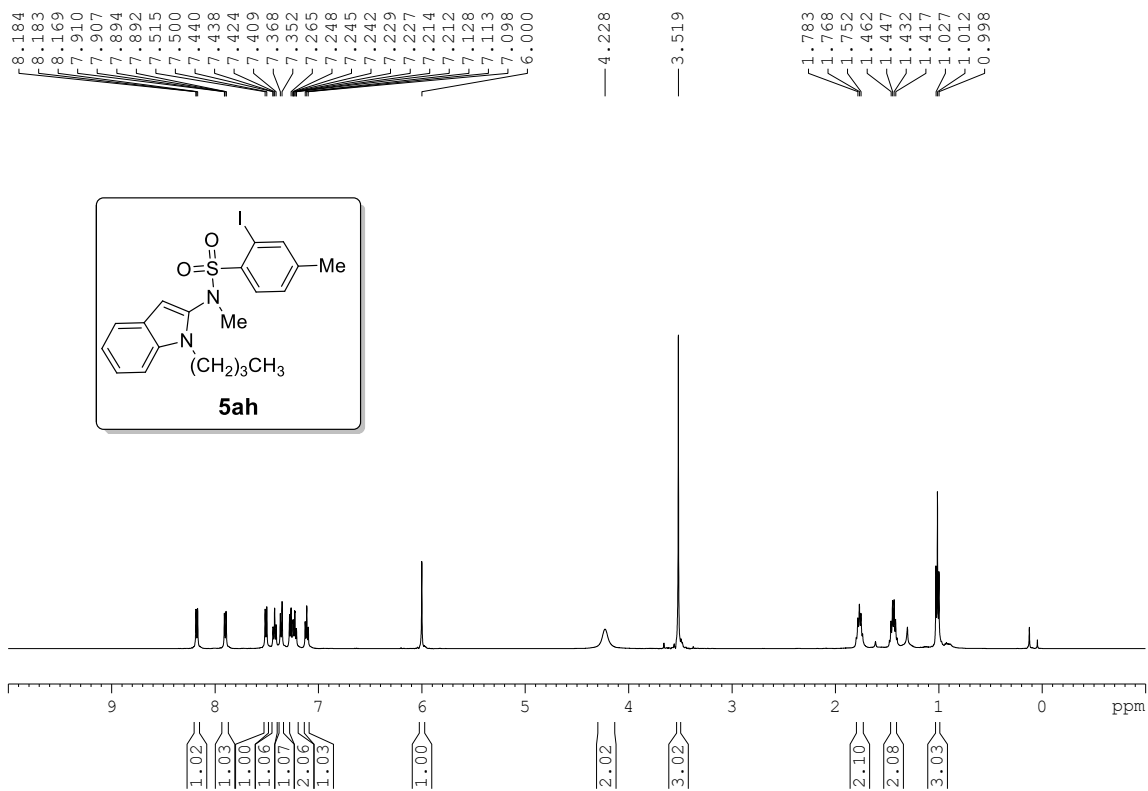

**Figure S19.**  $^1\text{H}$  NMR spectrum of compound **5ah**

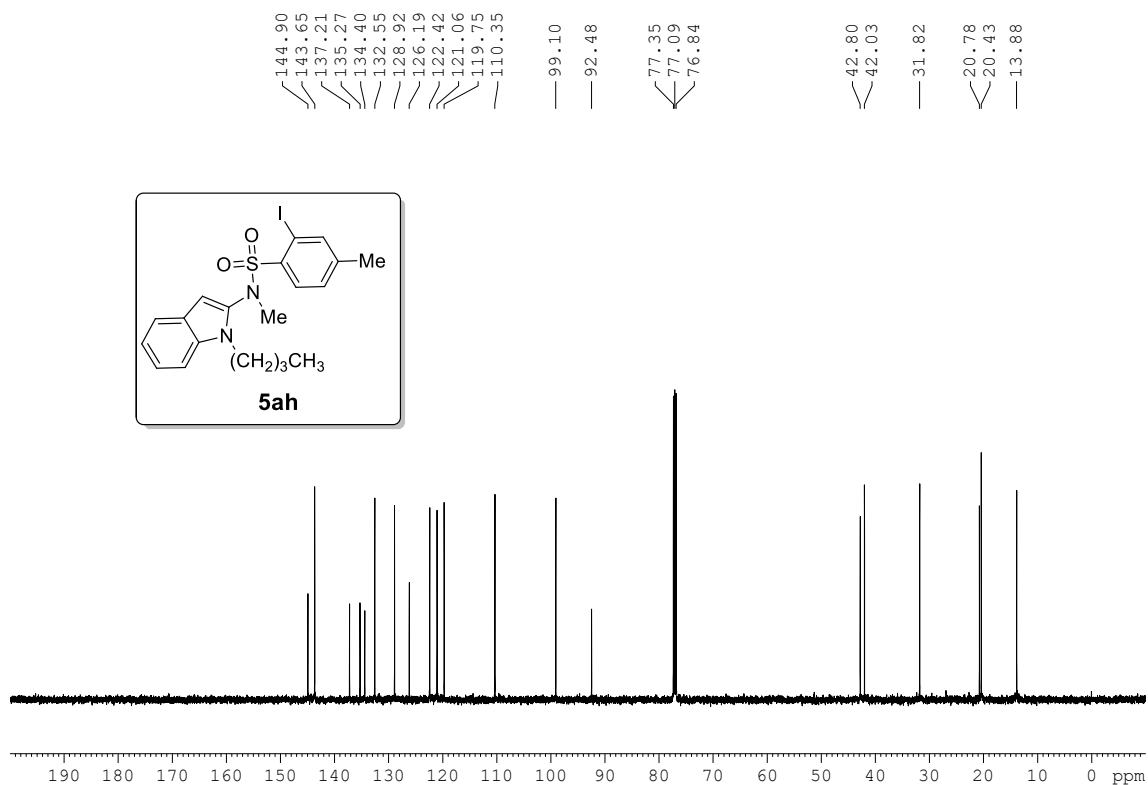

**Figure S20.**  $^{13}\text{C}\{^1\text{H}\}$  NMR spectrum of compound **5ah**

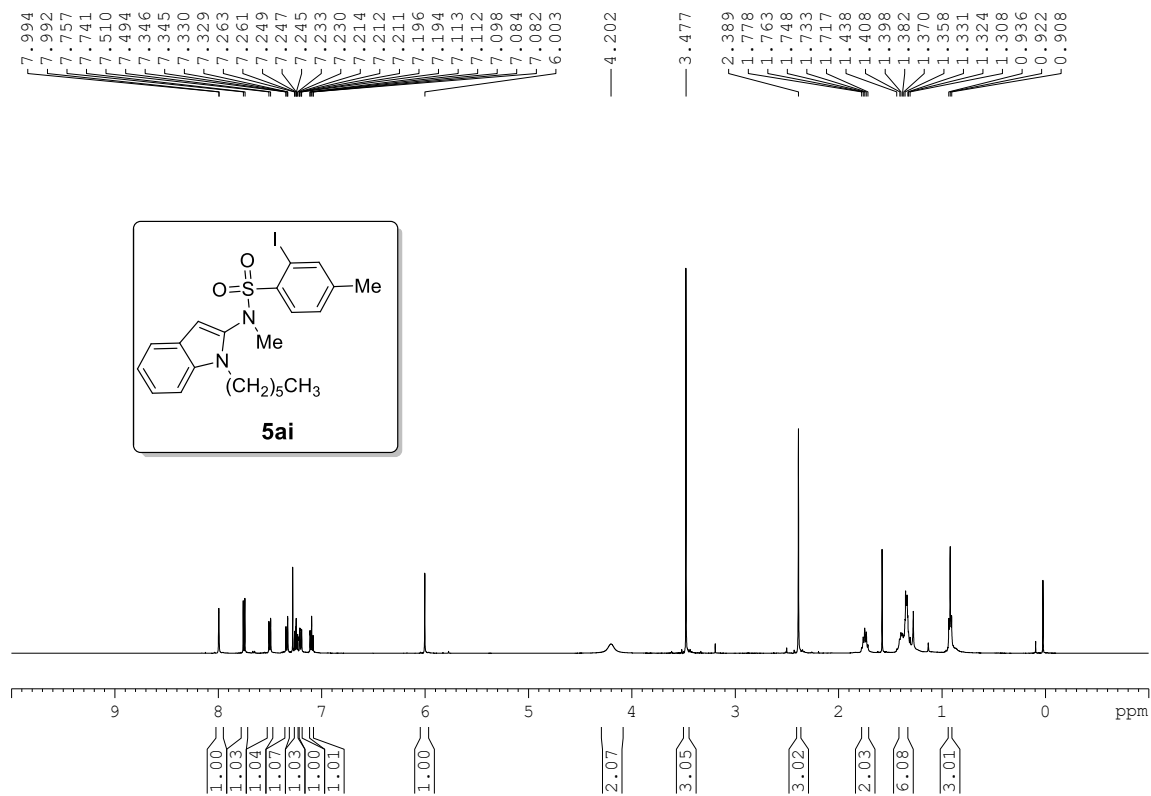

**Figure S21.**  $^1\text{H}$  NMR spectrum of compound **5ai**

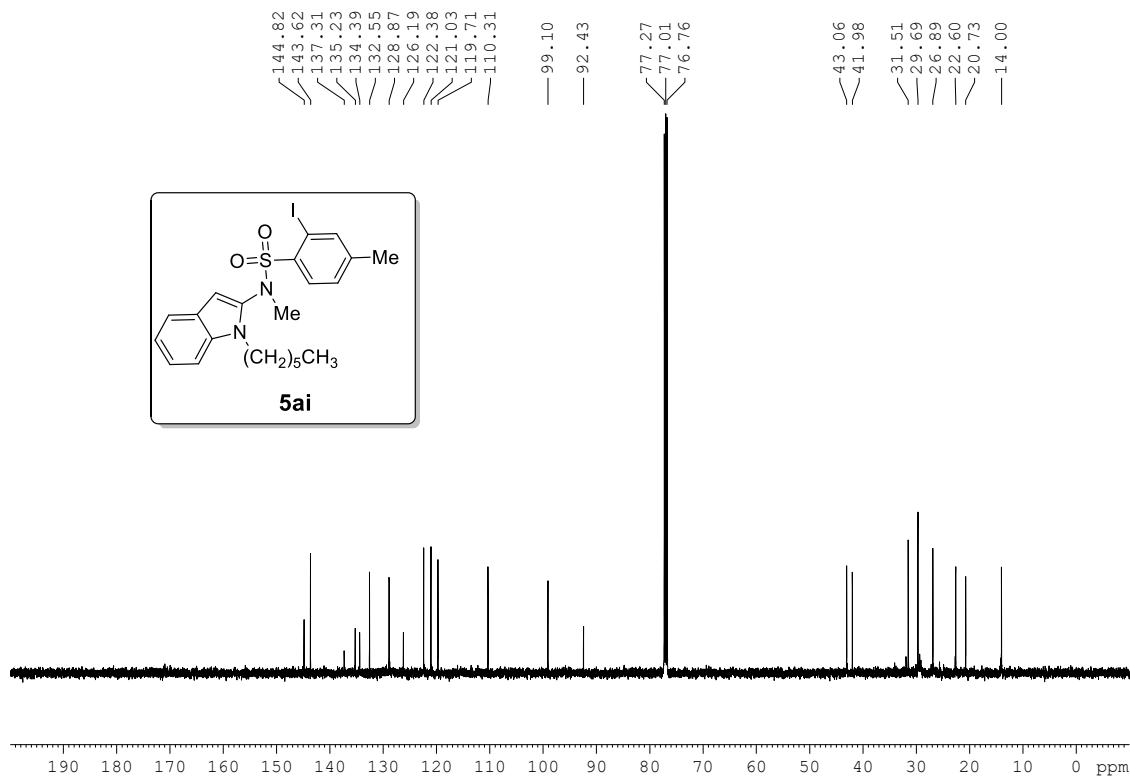

**Figure S22.**  $^{13}\text{C}\{^1\text{H}\}$  NMR spectrum of compound **5ai**

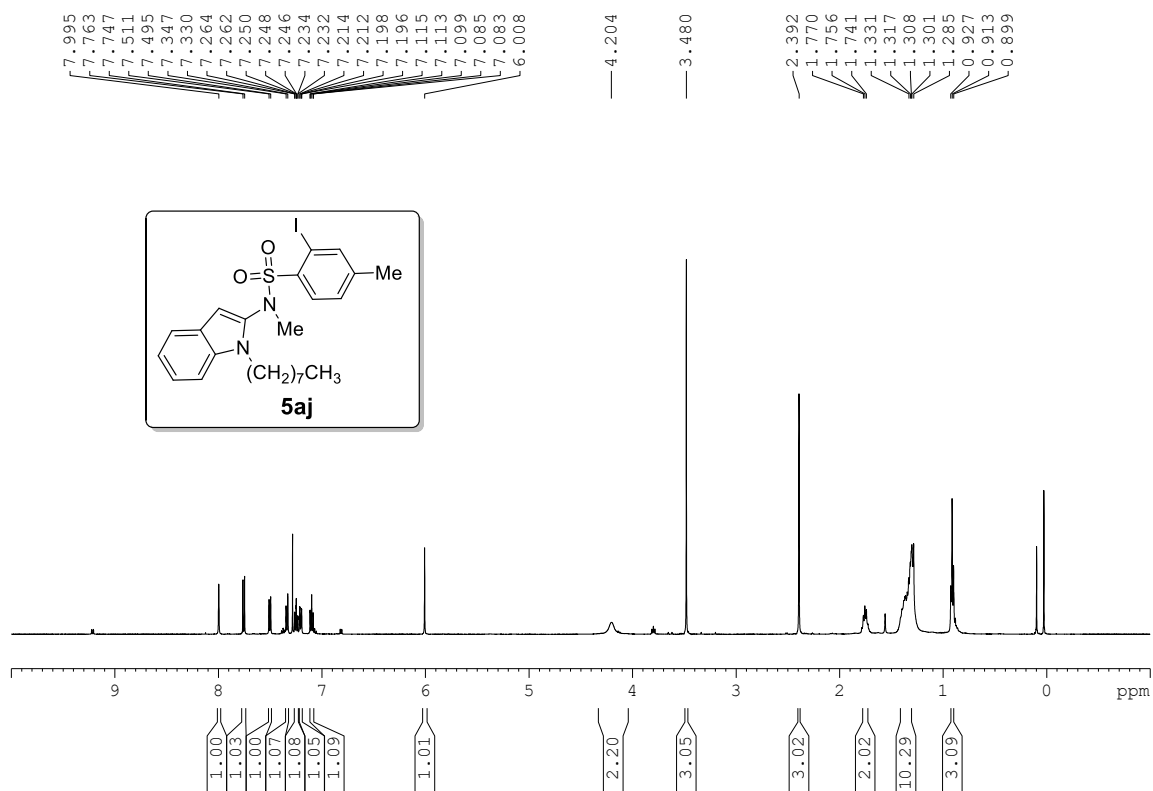

**Figure S23.** <sup>1</sup>H NMR spectrum of compound **5aj**

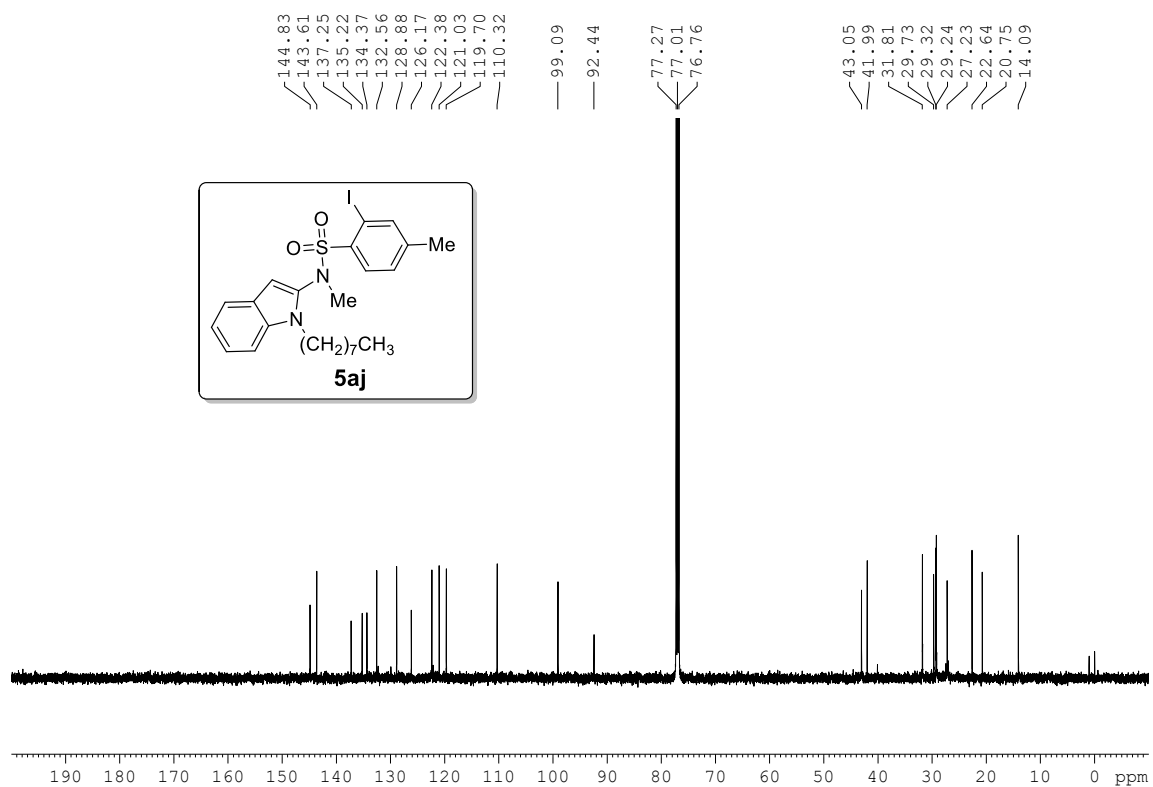

**Figure S24.** <sup>13</sup>C {<sup>1</sup>H} NMR spectrum of compound **5aj**

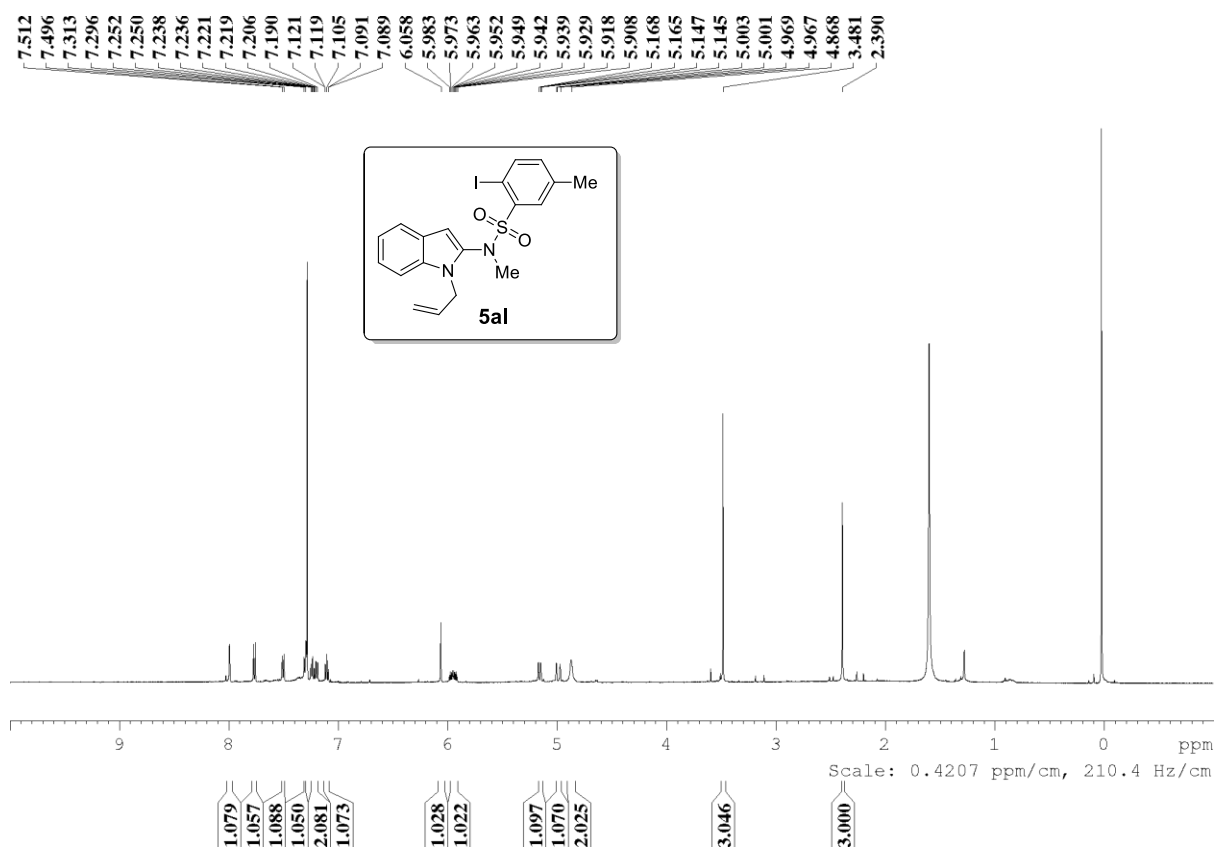

Figure S25.  $^1\text{H}$  NMR spectrum of compound **5al**

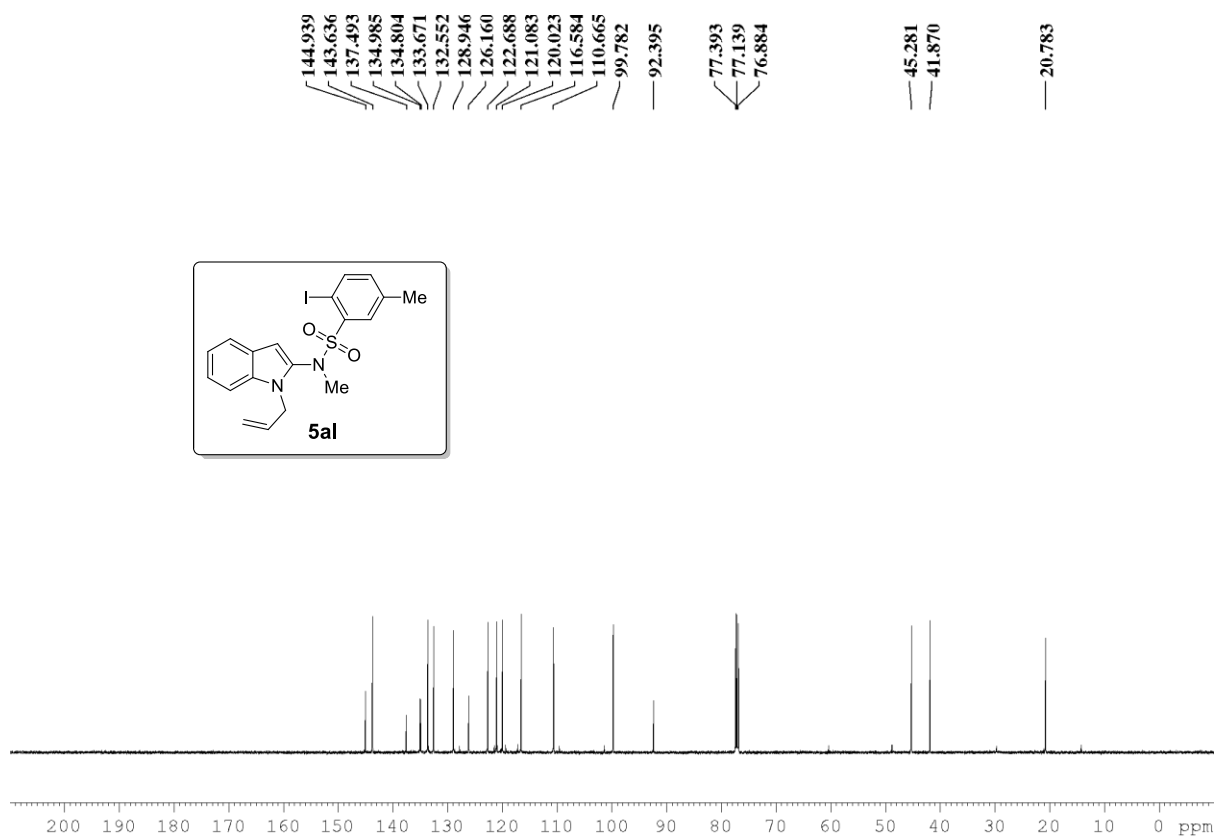

Figure S26.  $^{13}\text{C}\{^1\text{H}\}$  NMR spectrum of compound **5al**

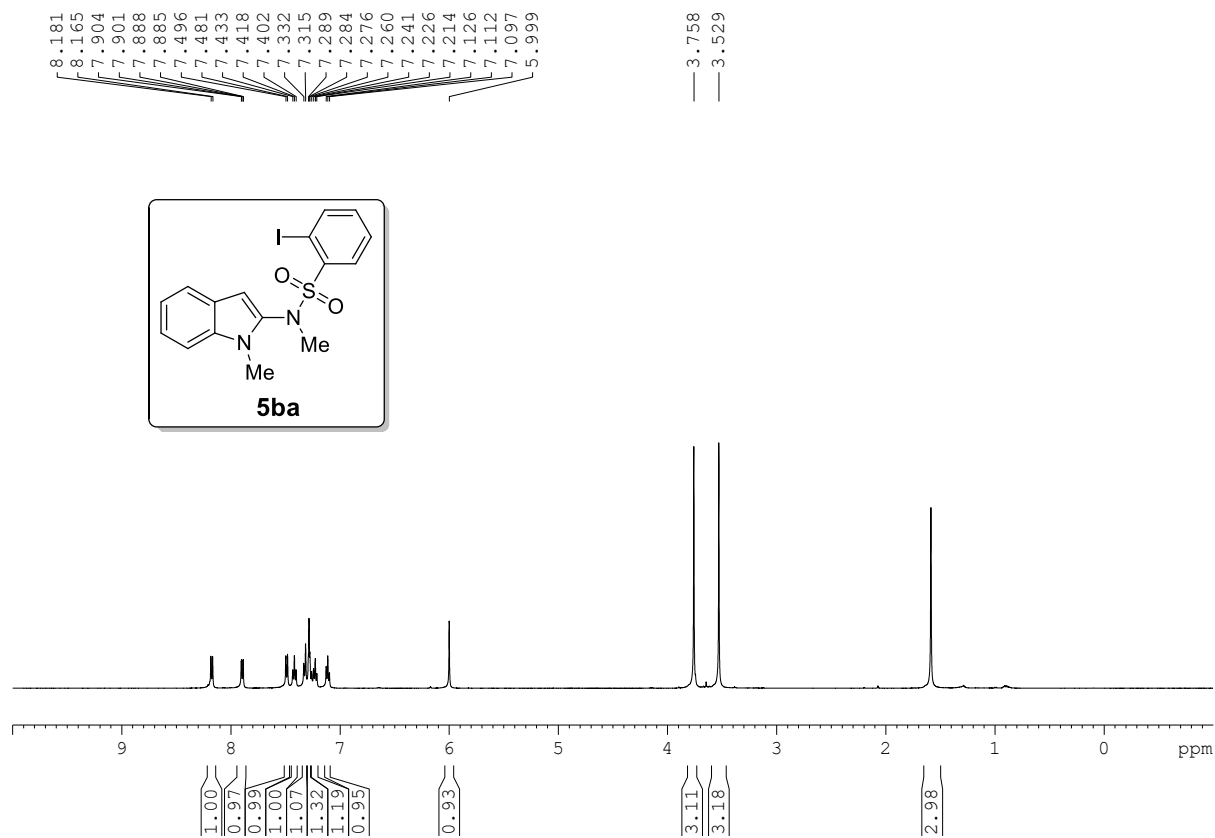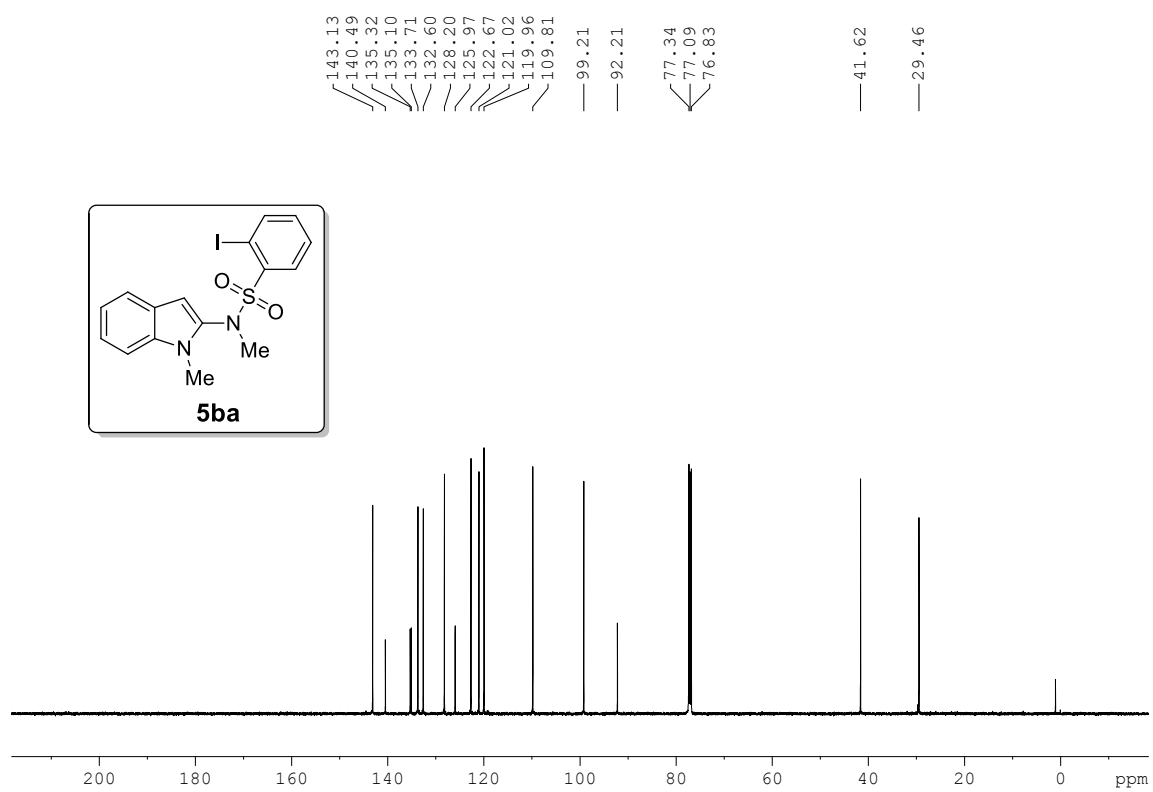

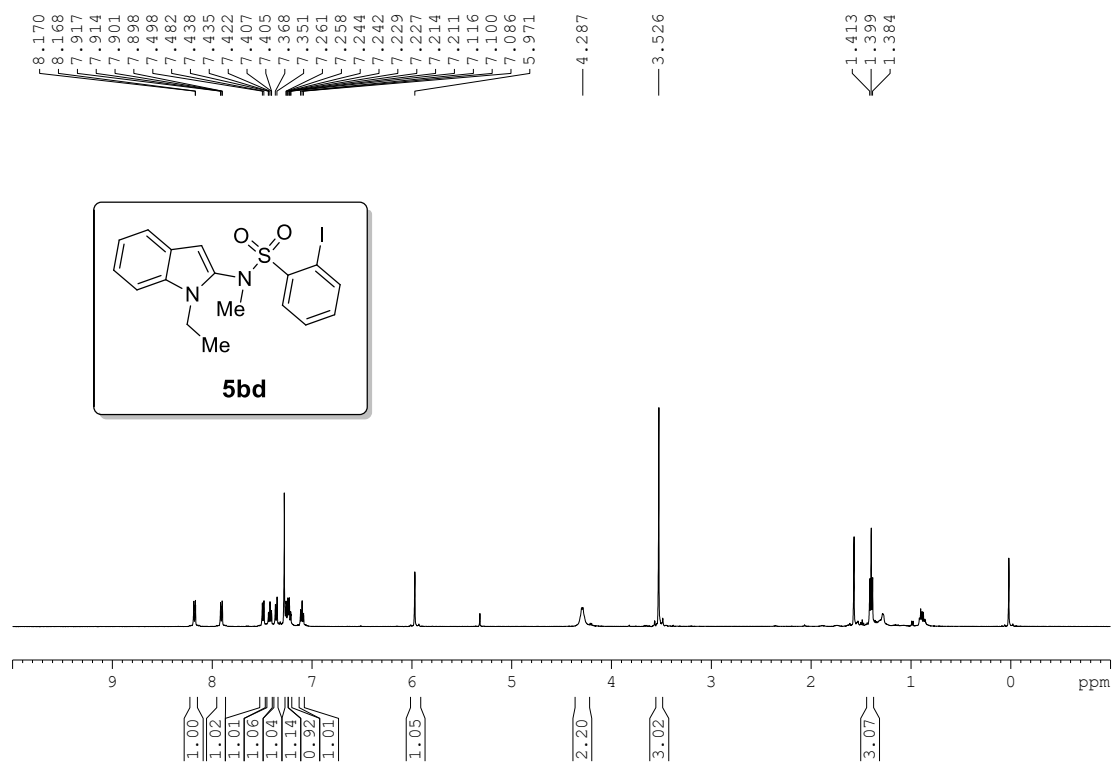

**Figure S29.** <sup>1</sup>H NMR spectrum of compound **5bd**

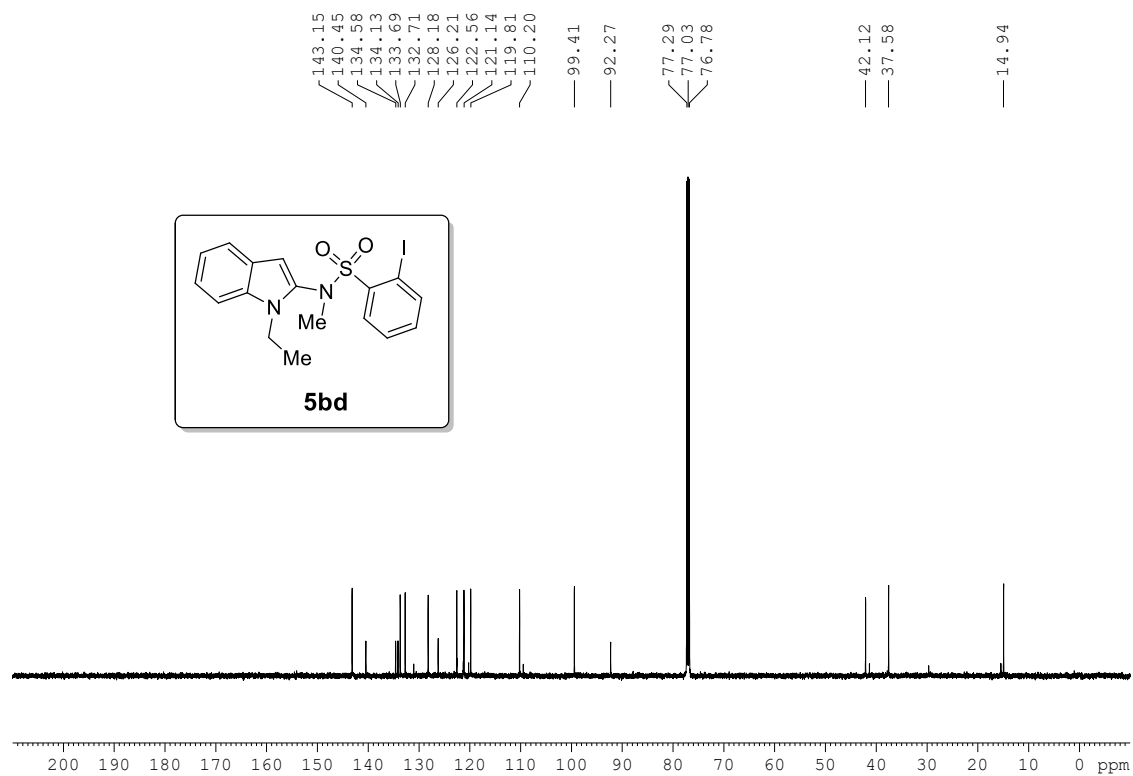

**Figure S30.** <sup>13</sup>C {<sup>1</sup>H} NMR spectrum of compound **5bd**

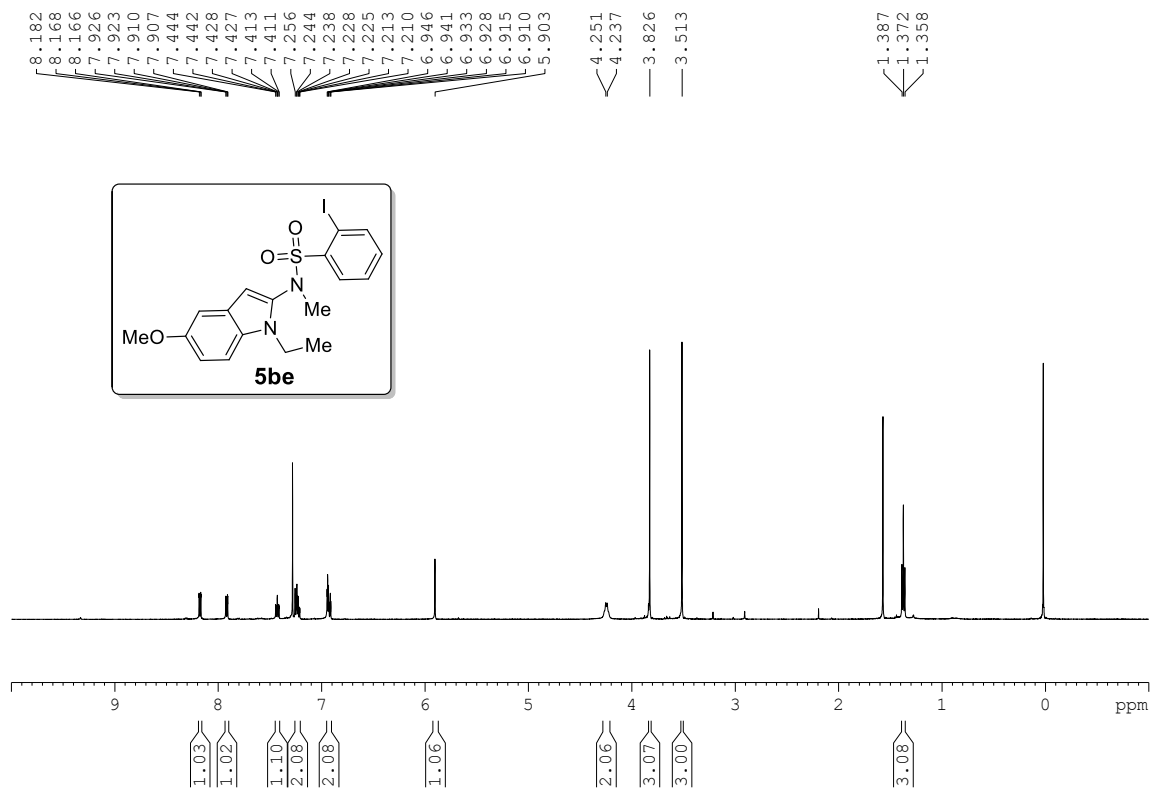

**Figure S31.** <sup>1</sup>H NMR spectrum of compound **5be**

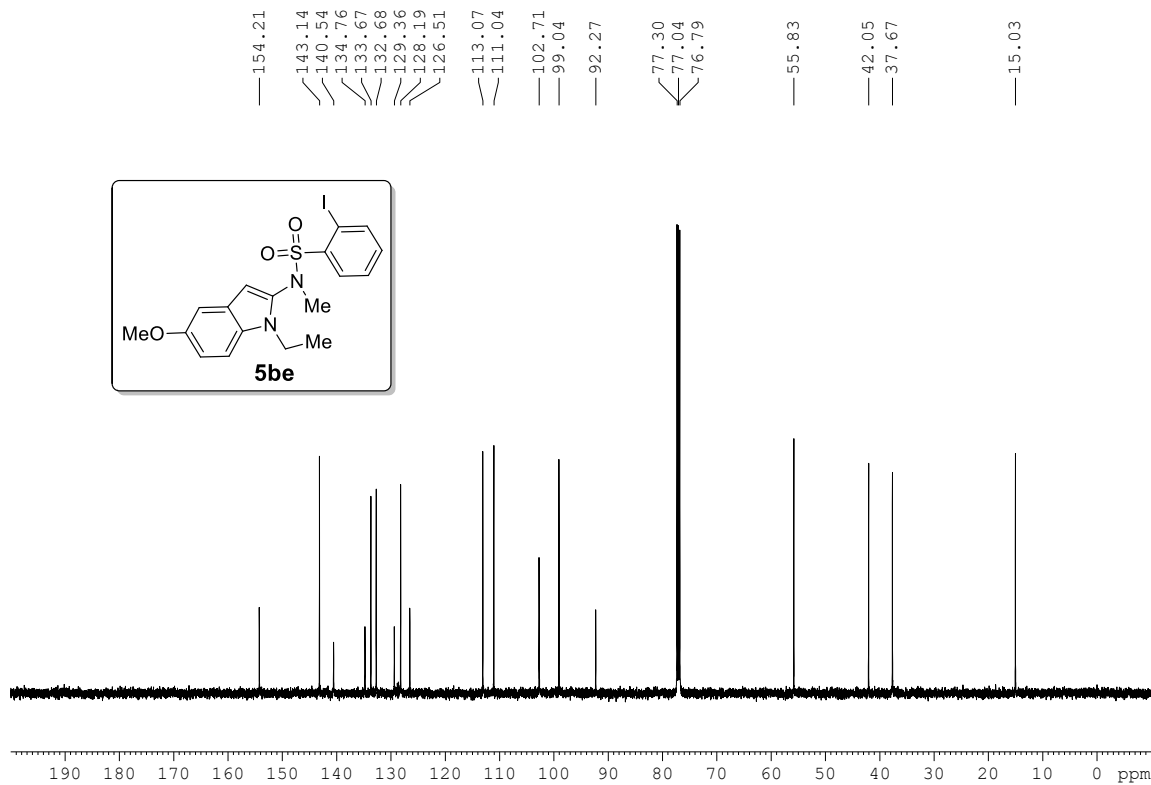

**Figure S32.** <sup>13</sup>C {<sup>1</sup>H} NMR spectrum of compound **5be**



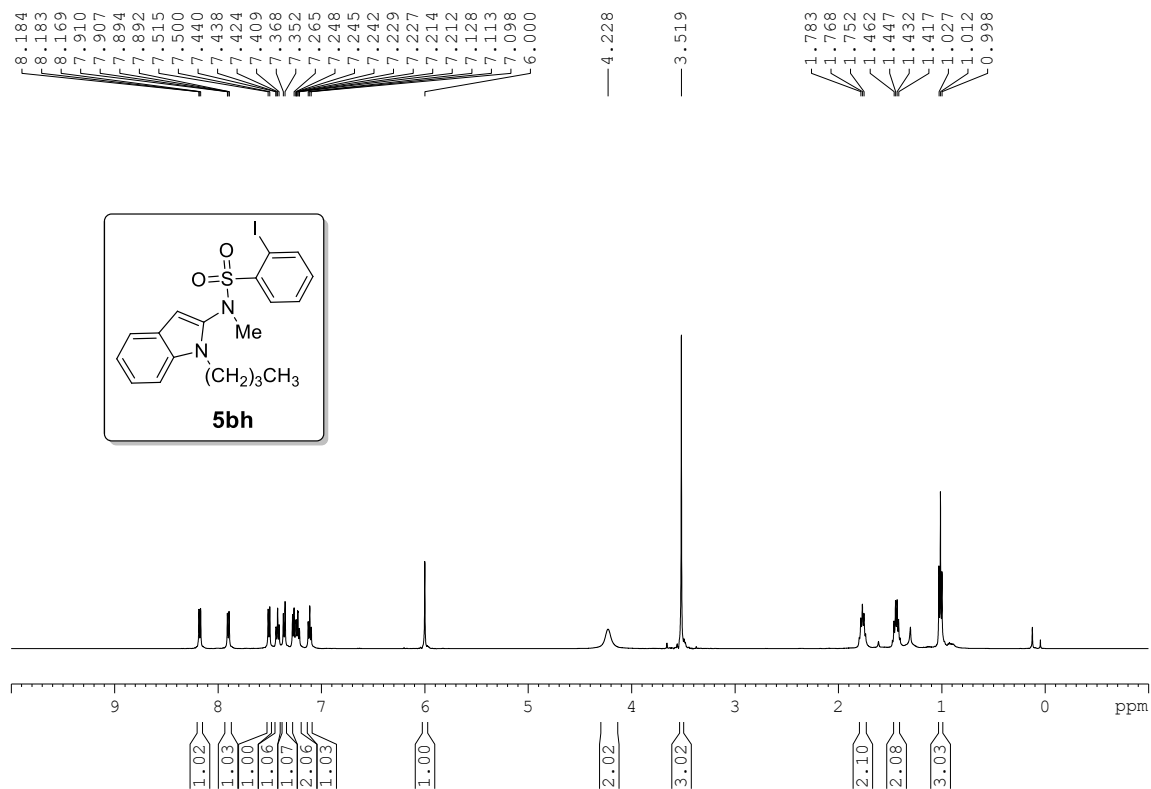

**Figure S33.**  $^1\text{H}$  NMR spectrum of compound **5bh**

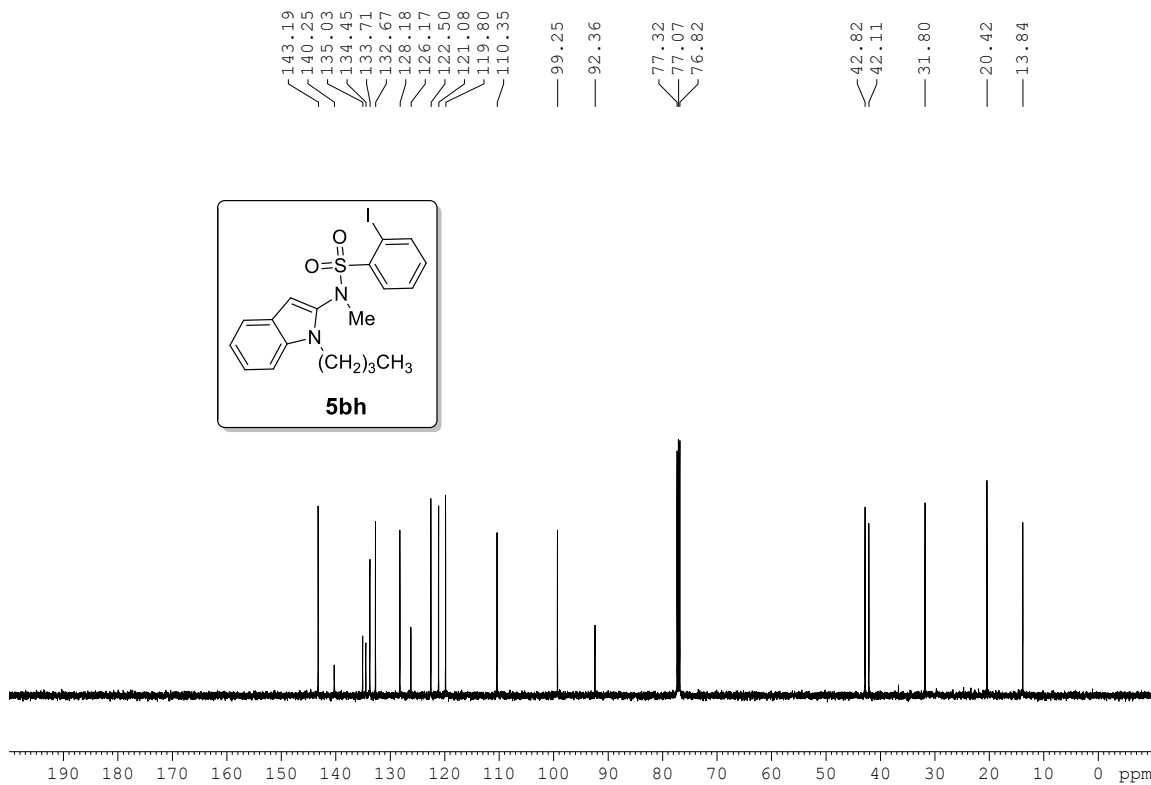

**Figure S34.**  $^{13}\text{C}\{^1\text{H}\}$  NMR spectrum of compound **5bh**

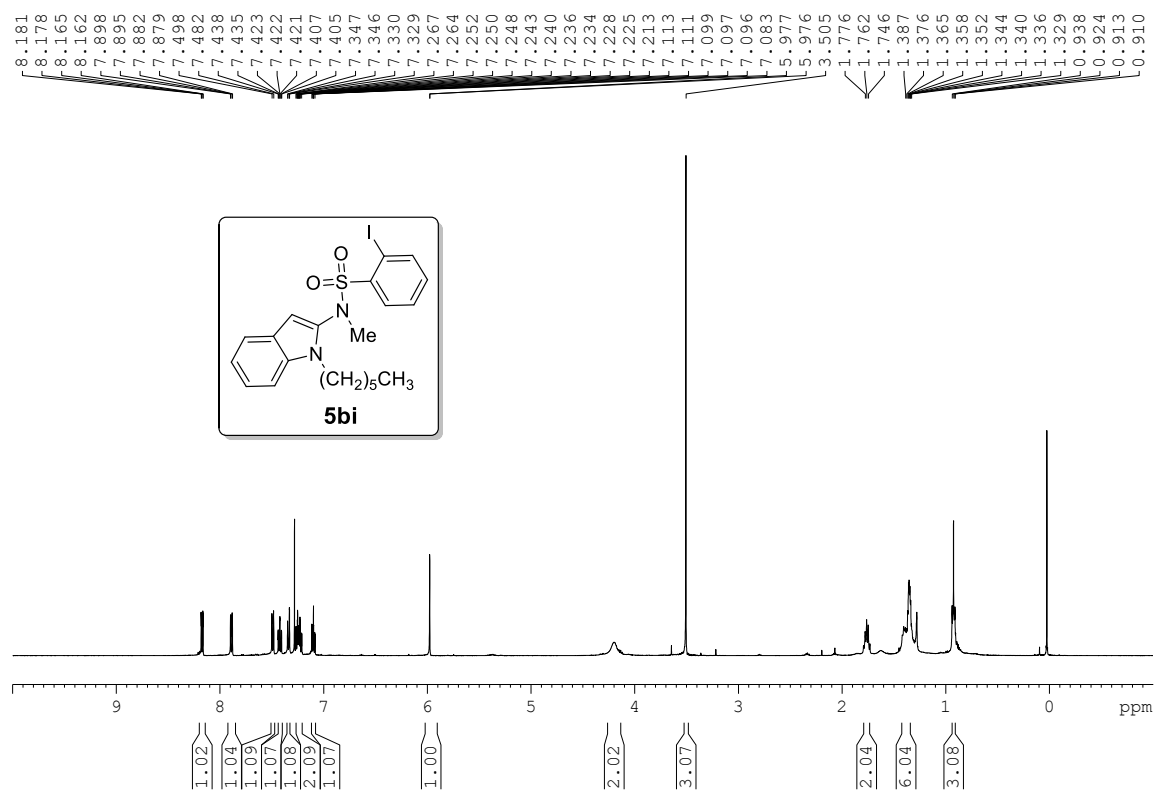

**Figure S35.** <sup>1</sup>H NMR spectrum of compound **5bi**

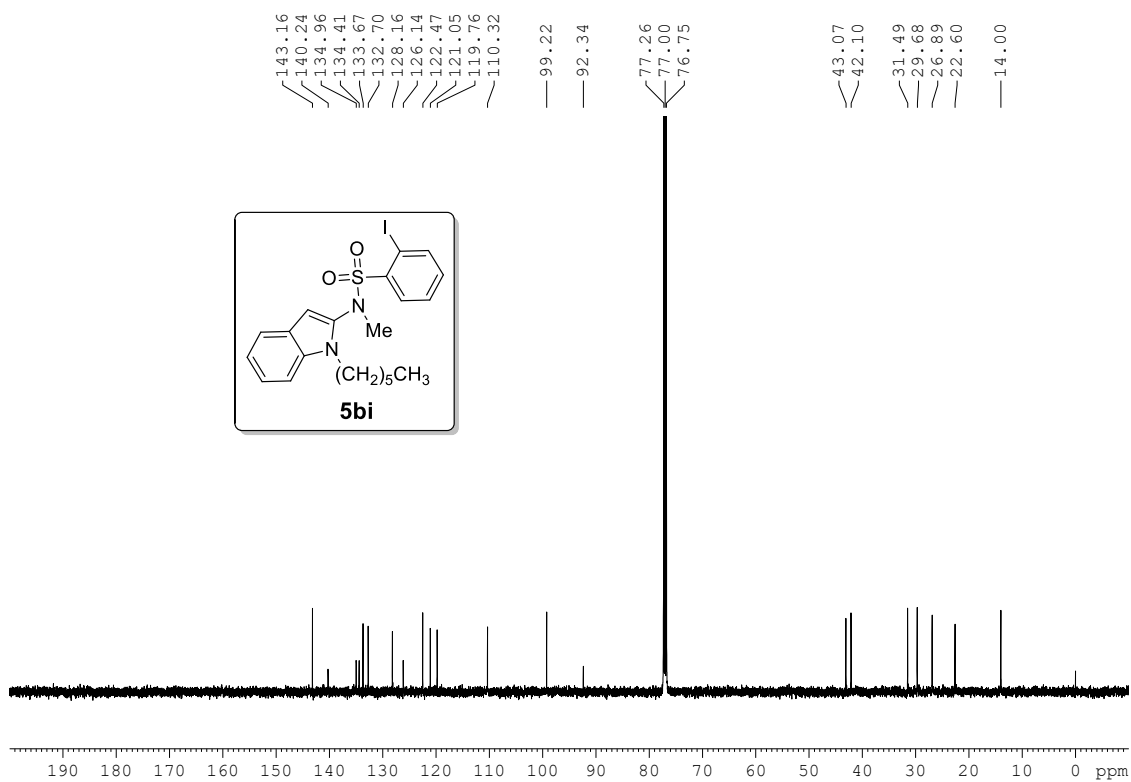

**Figure S36.** <sup>13</sup>C{<sup>1</sup>H} NMR spectrum of compound **5bi**

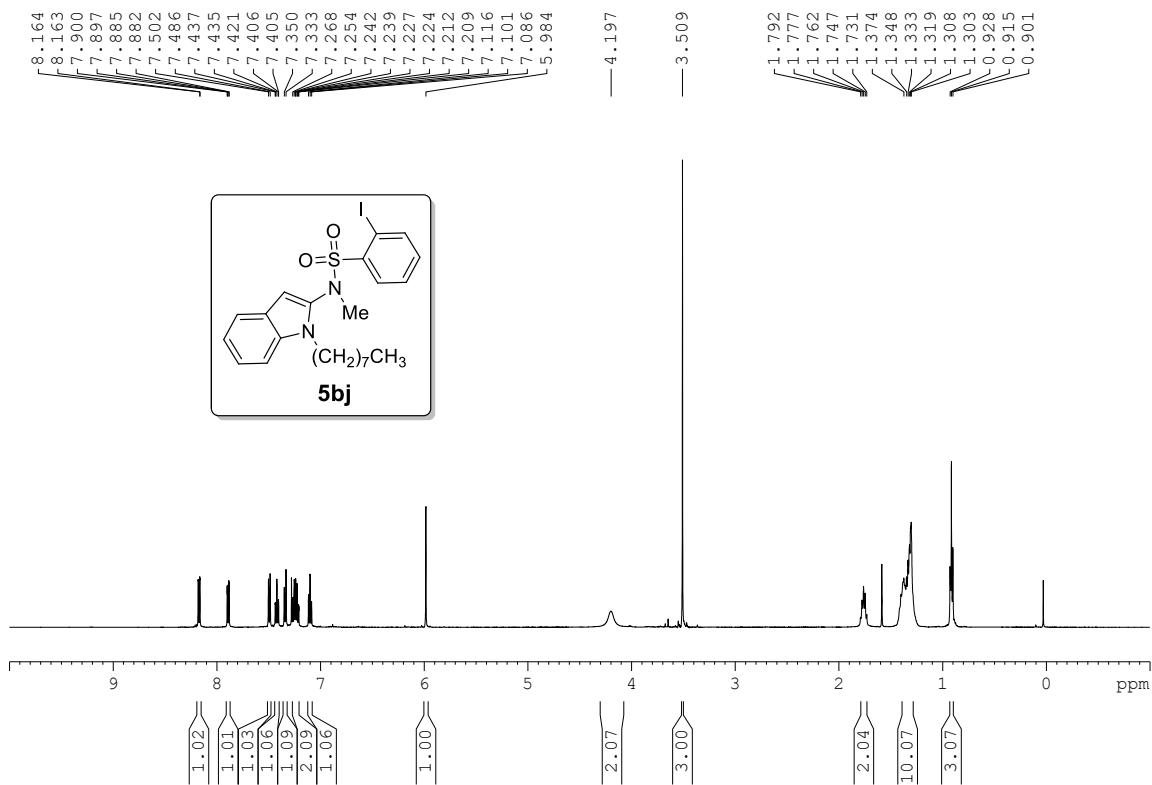

Figure S37. <sup>1</sup>H NMR spectrum of compound **5bj**

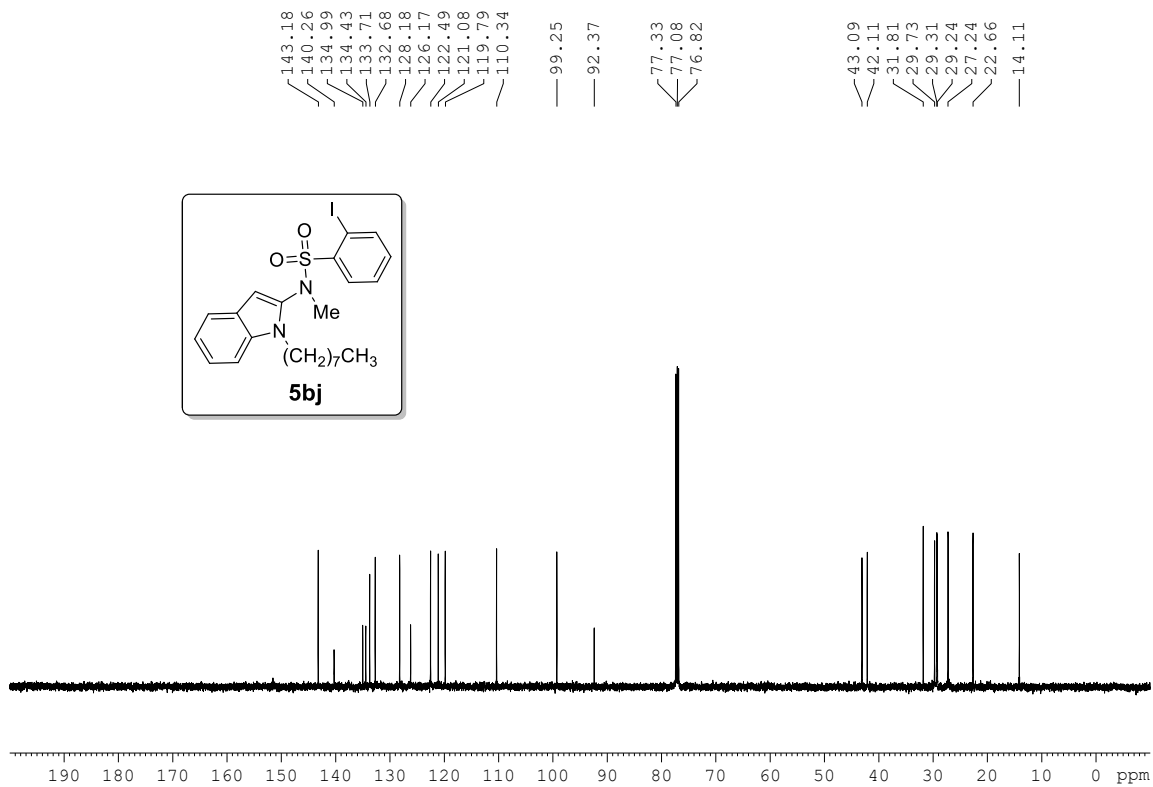

Figure S38. <sup>13</sup>C{<sup>1</sup>H} NMR spectrum of compound **5bj**

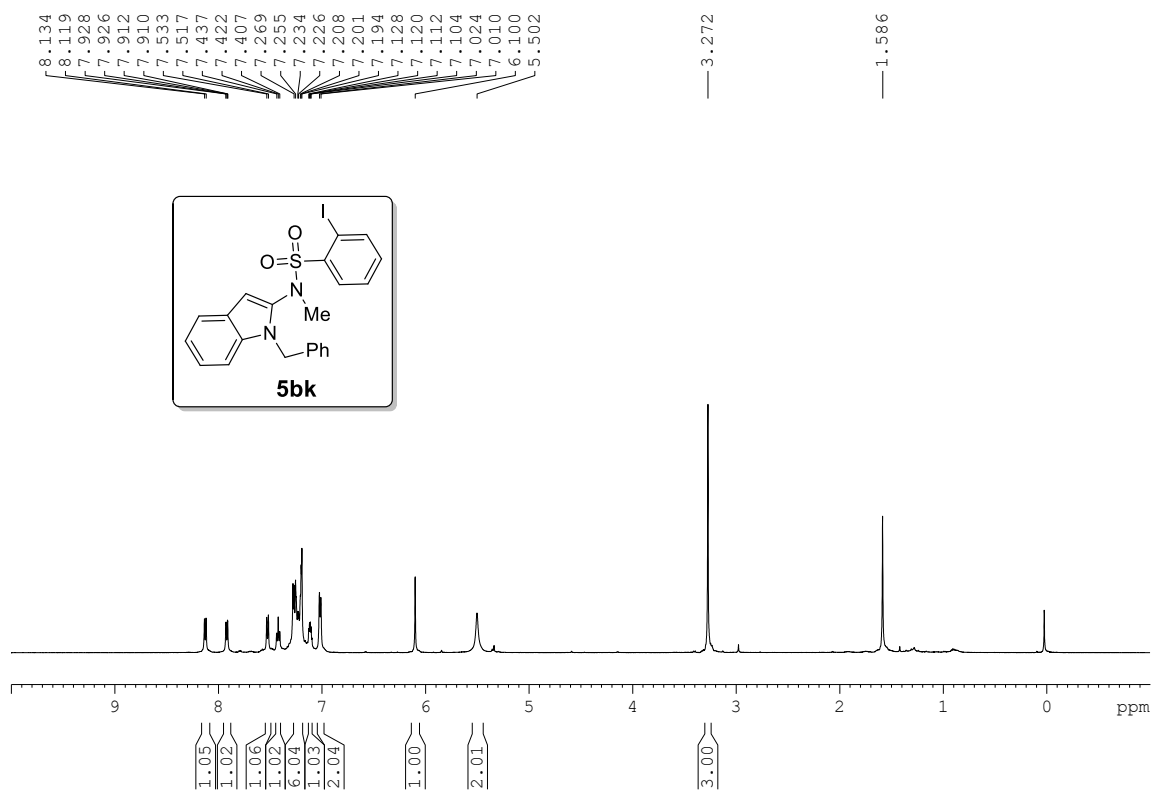

**Figure S39.**  $^1\text{H}$  NMR spectrum of compound **5bk**

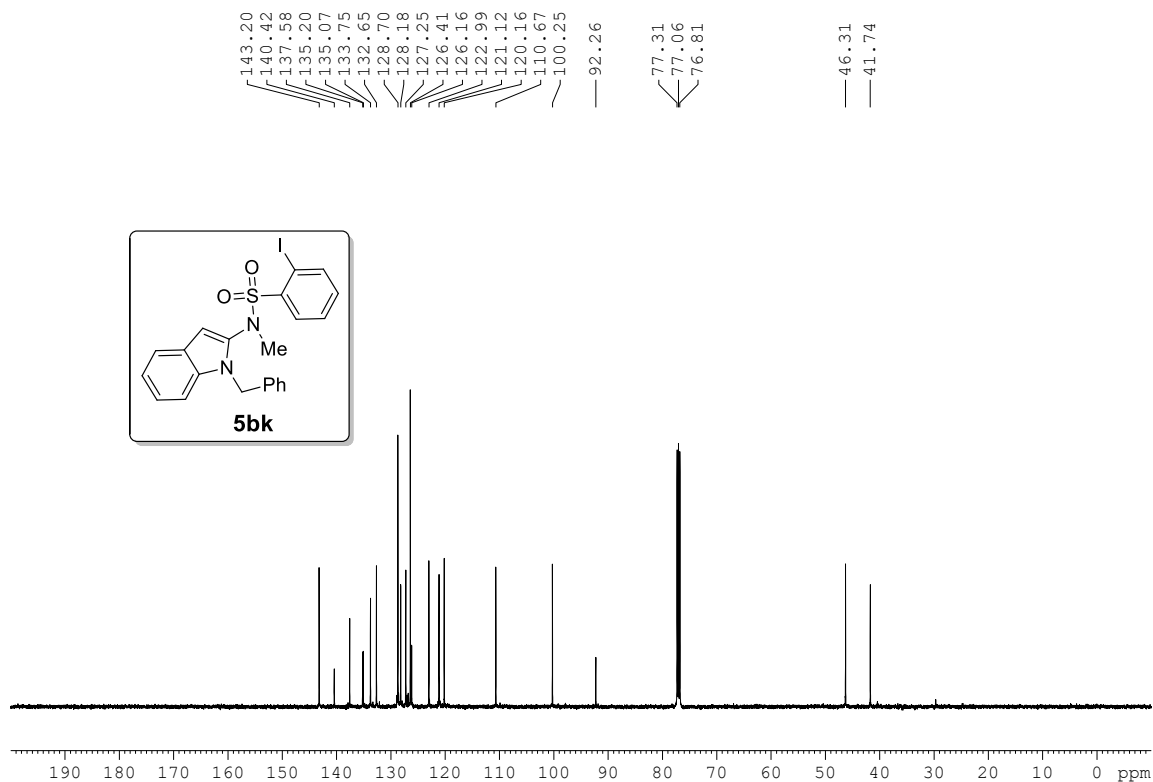

**Figure S40.**  $^{13}\text{C}\{^1\text{H}\}$  NMR spectrum of compound **5bk**

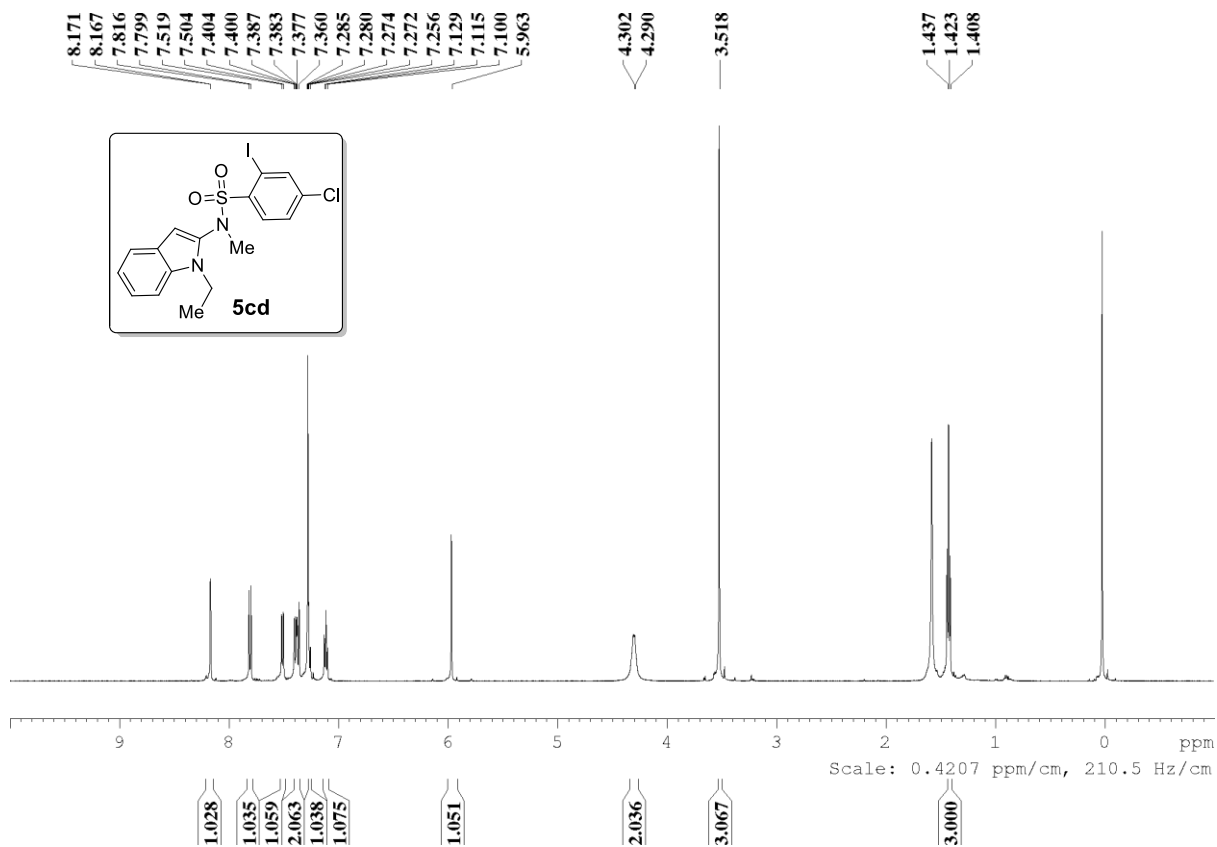

**Figure S41.** <sup>1</sup>H NMR spectrum of compound **5cd**

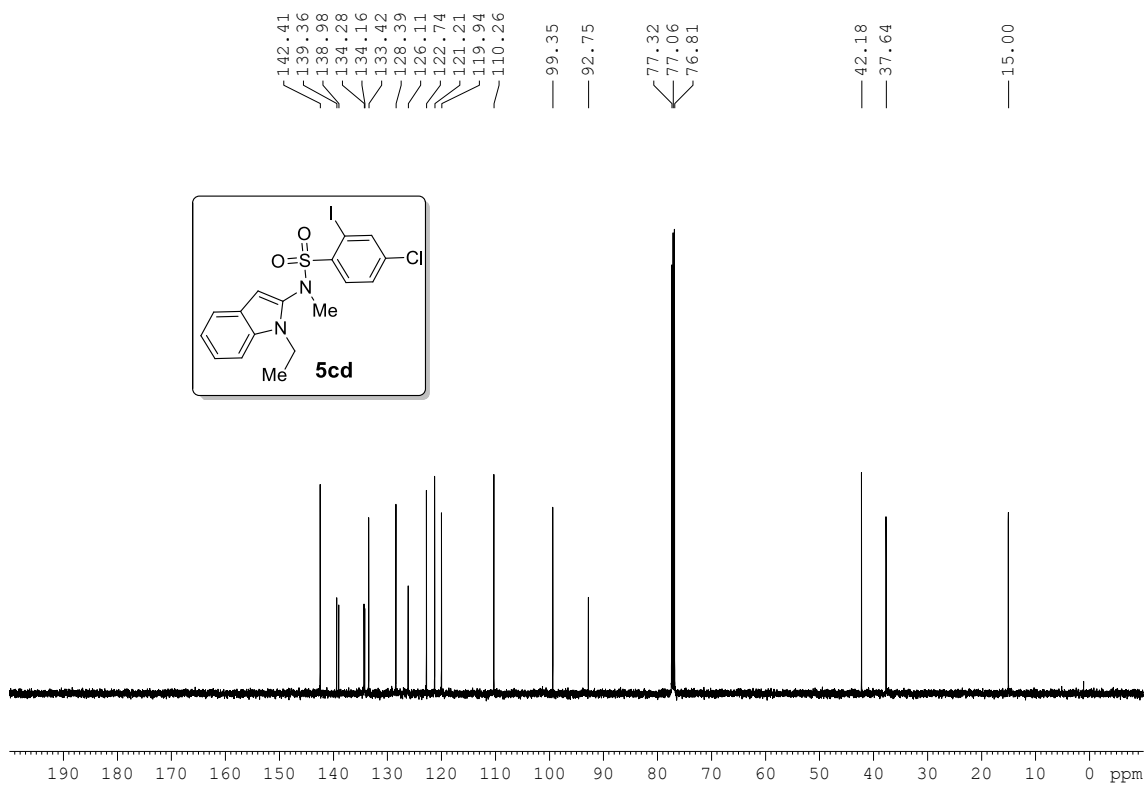

**Figure S42.** <sup>13</sup>C {<sup>1</sup>H} NMR spectrum of compound **5cd**

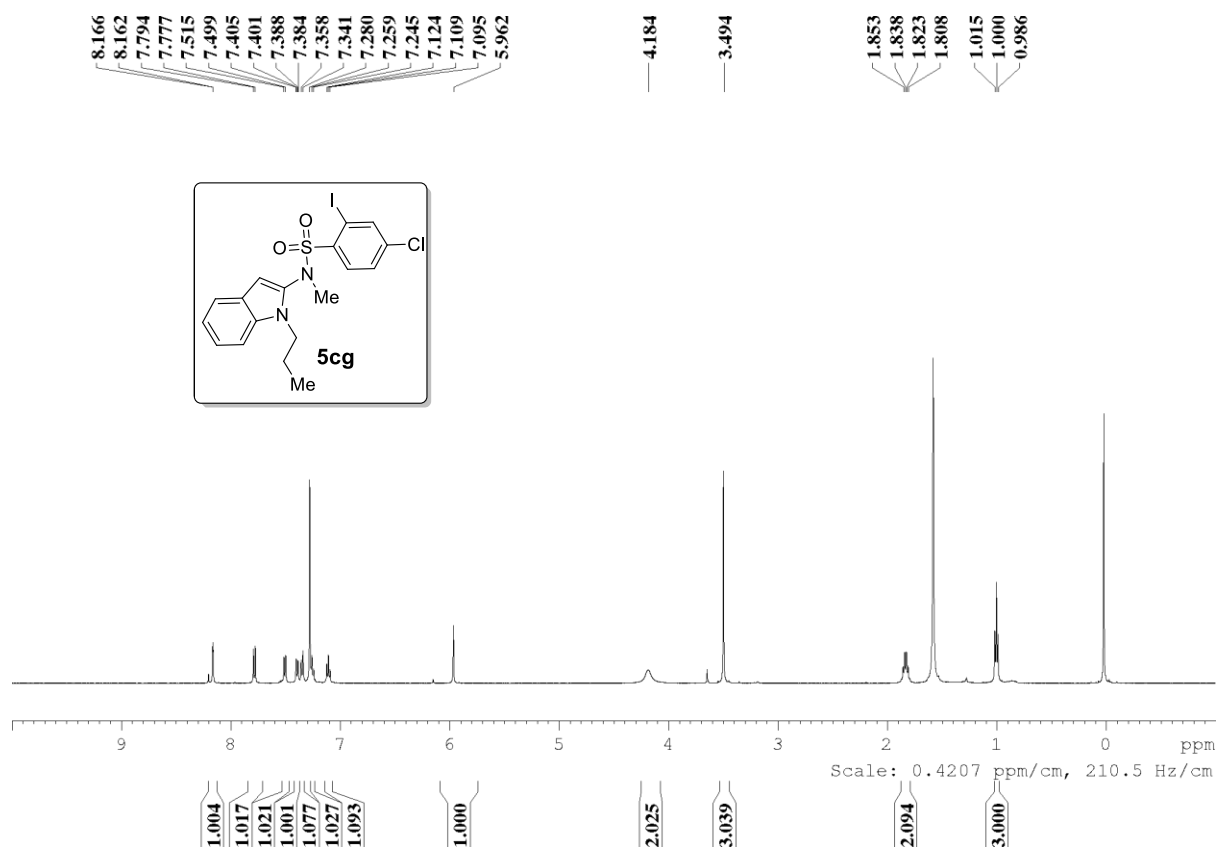

**Figure S43.  $^1\text{H}$  NMR spectrum of compound **5cg****

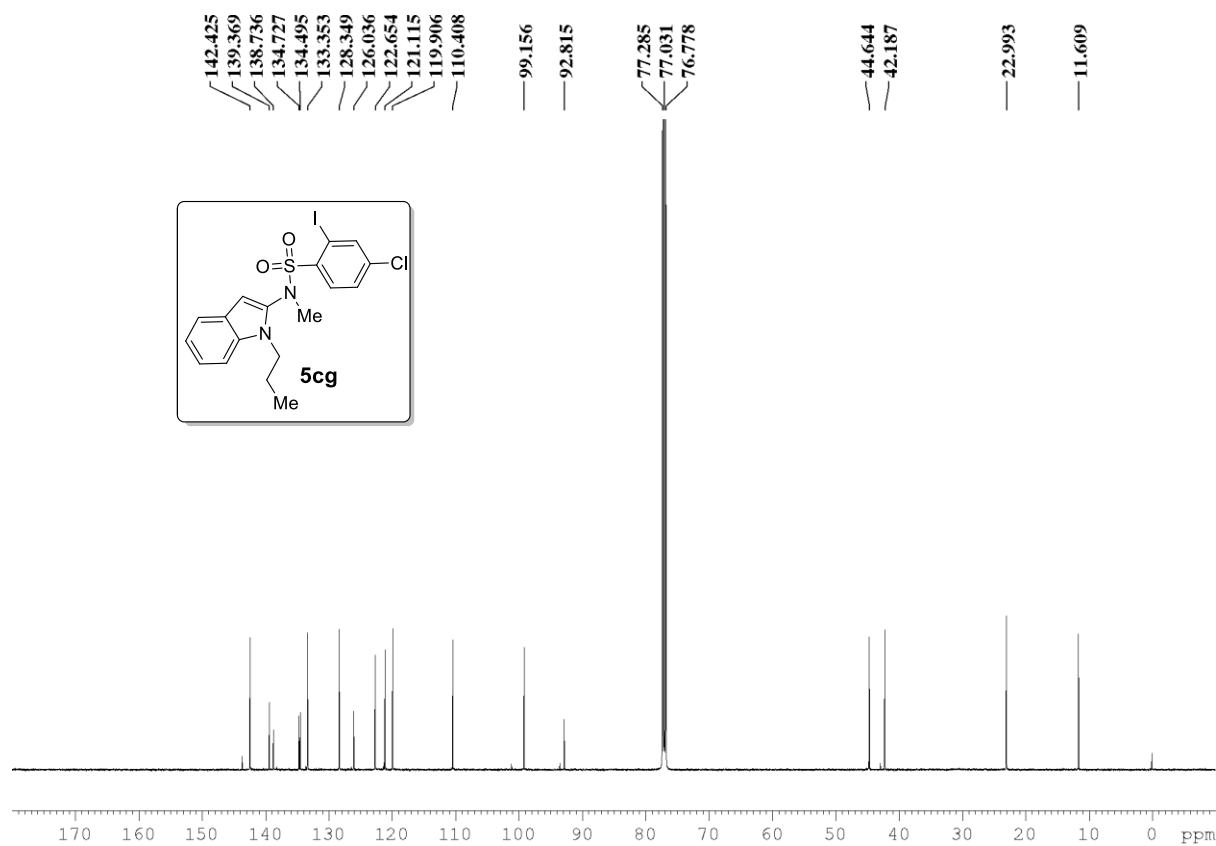

**Figure S44.  $^{13}\text{C}\{^1\text{H}\}$  NMR spectrum of compound **5cg****

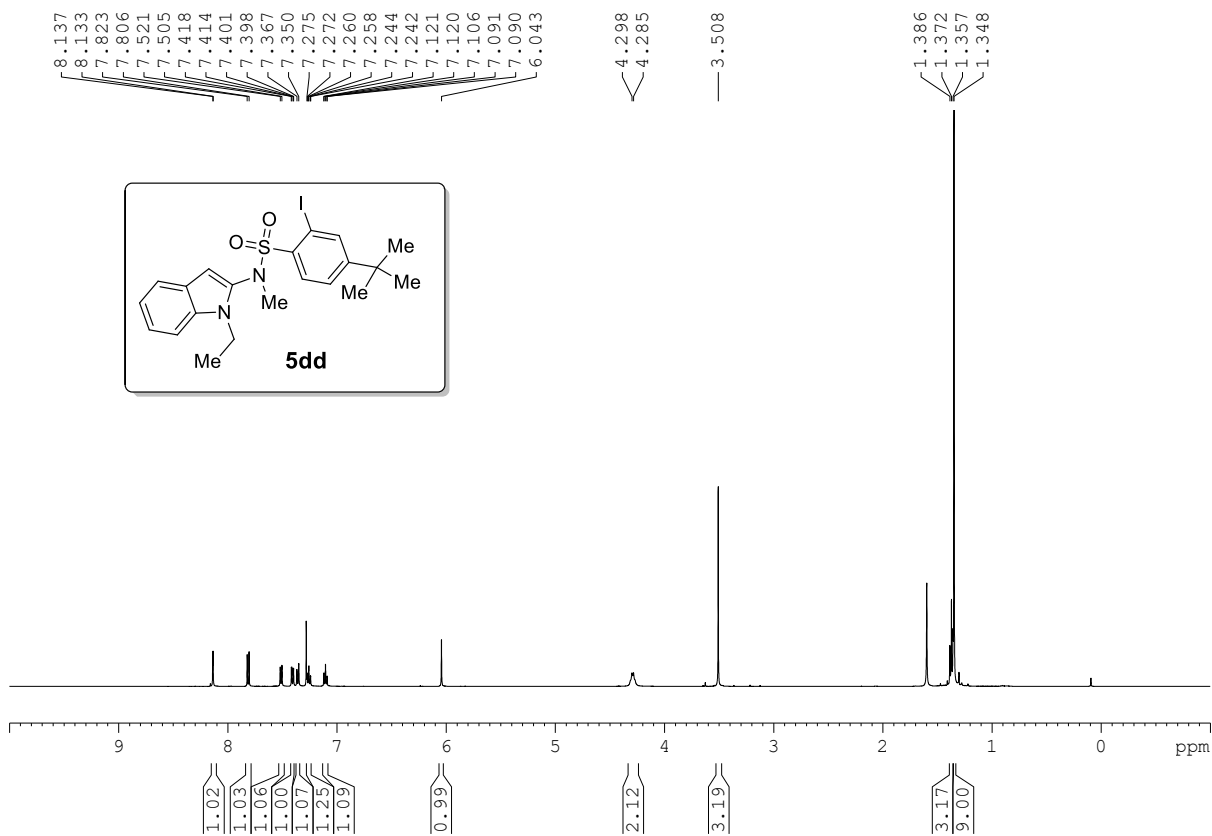

**Figure S45.** <sup>1</sup>H NMR spectrum of compound **5dd**

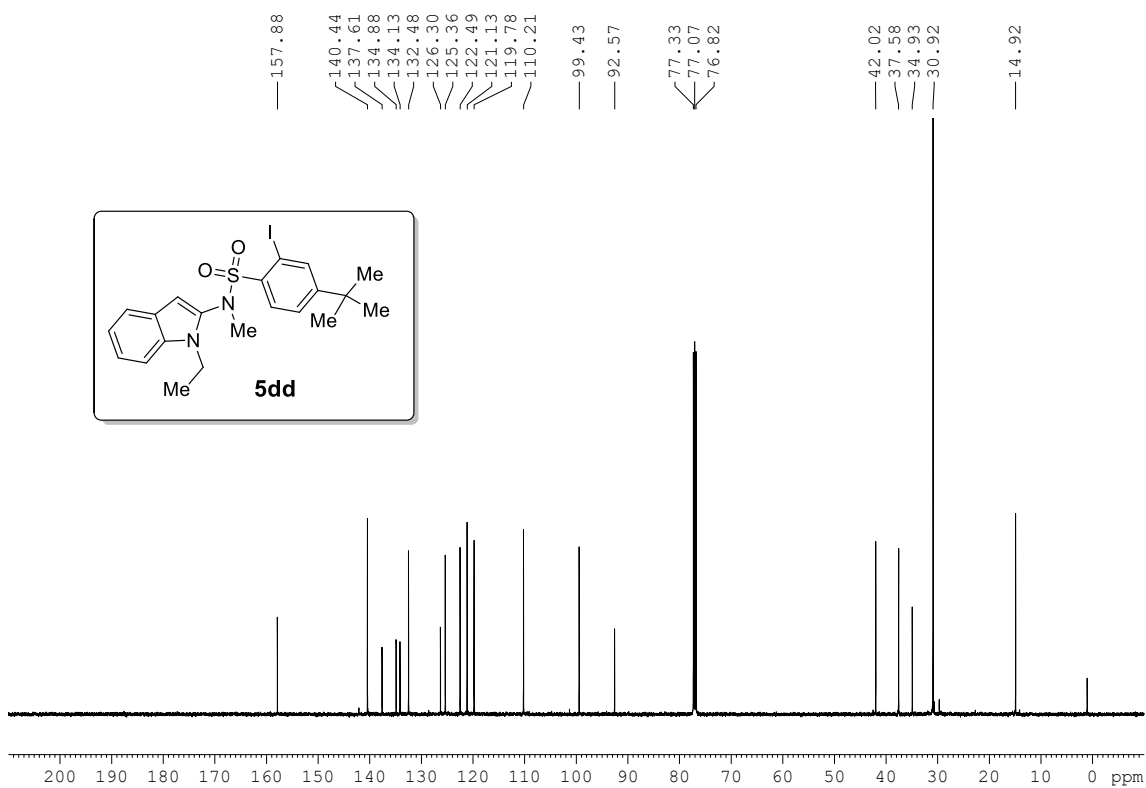

**Figure S46.** <sup>13</sup>C {<sup>1</sup>H} NMR spectrum of compound **5dd**

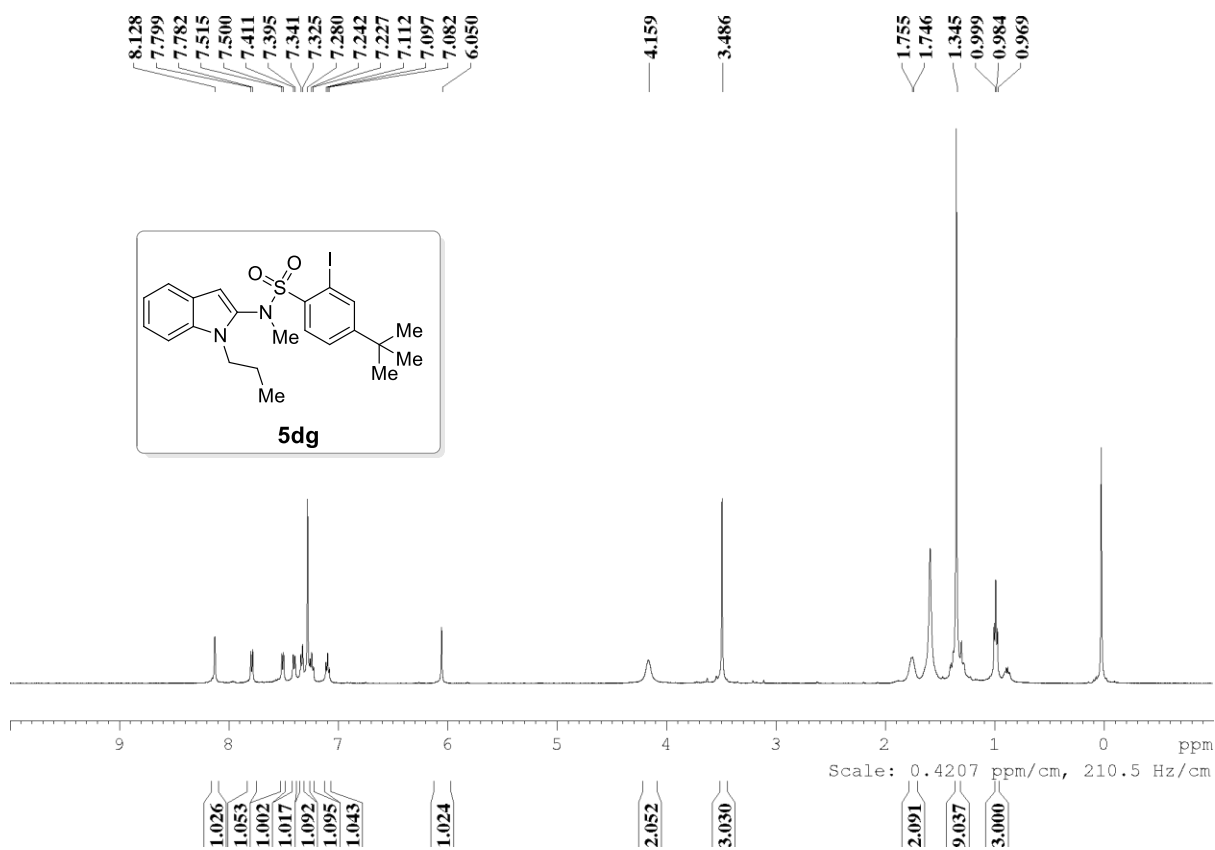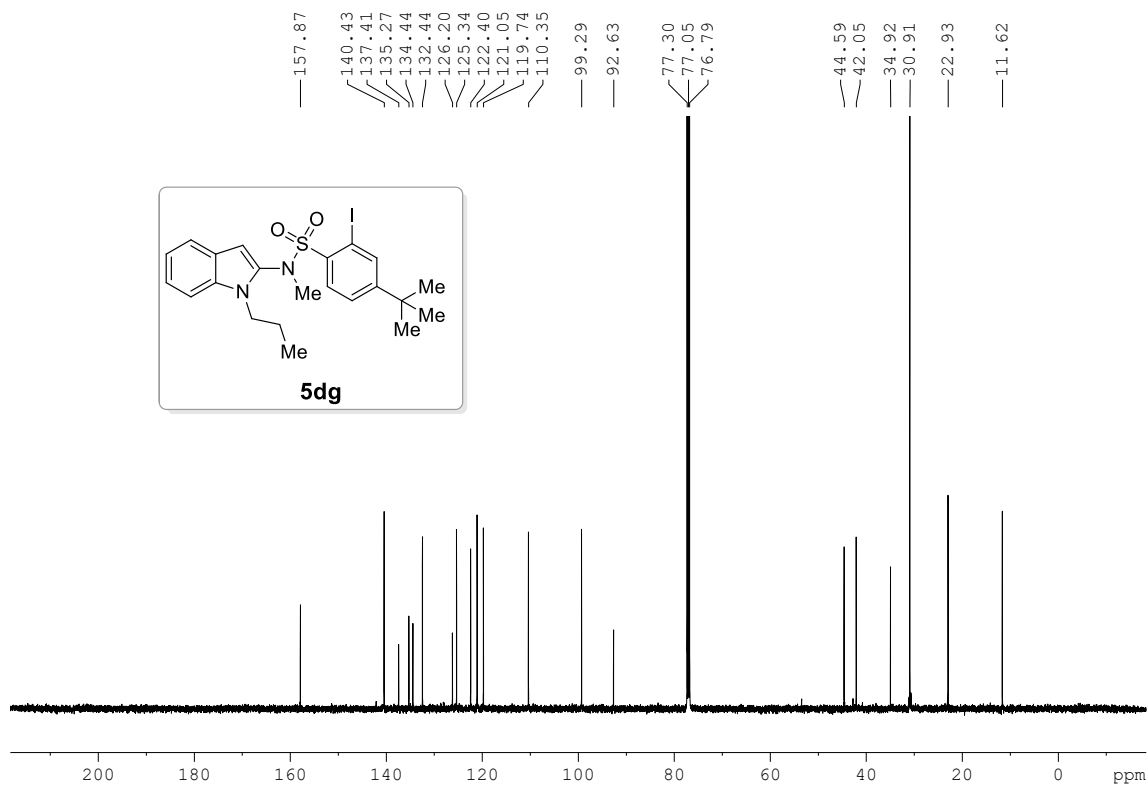



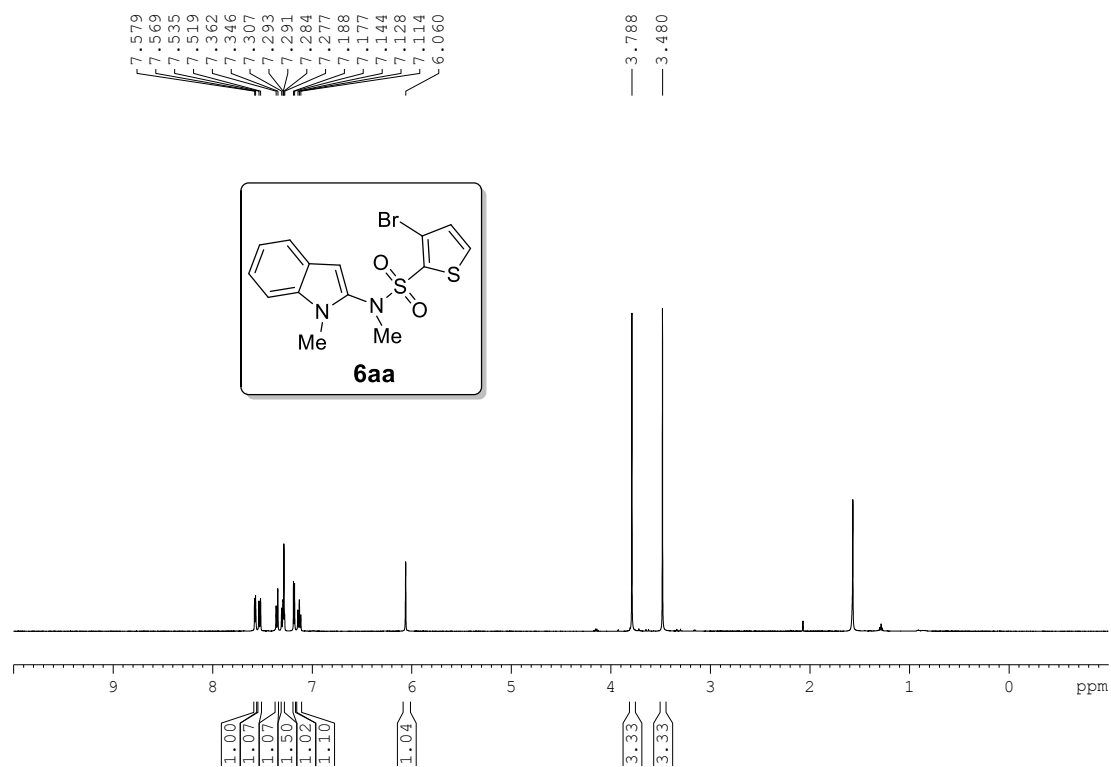

**Figure S49.**  $^1\text{H}$  NMR spectrum of compound **6aa**

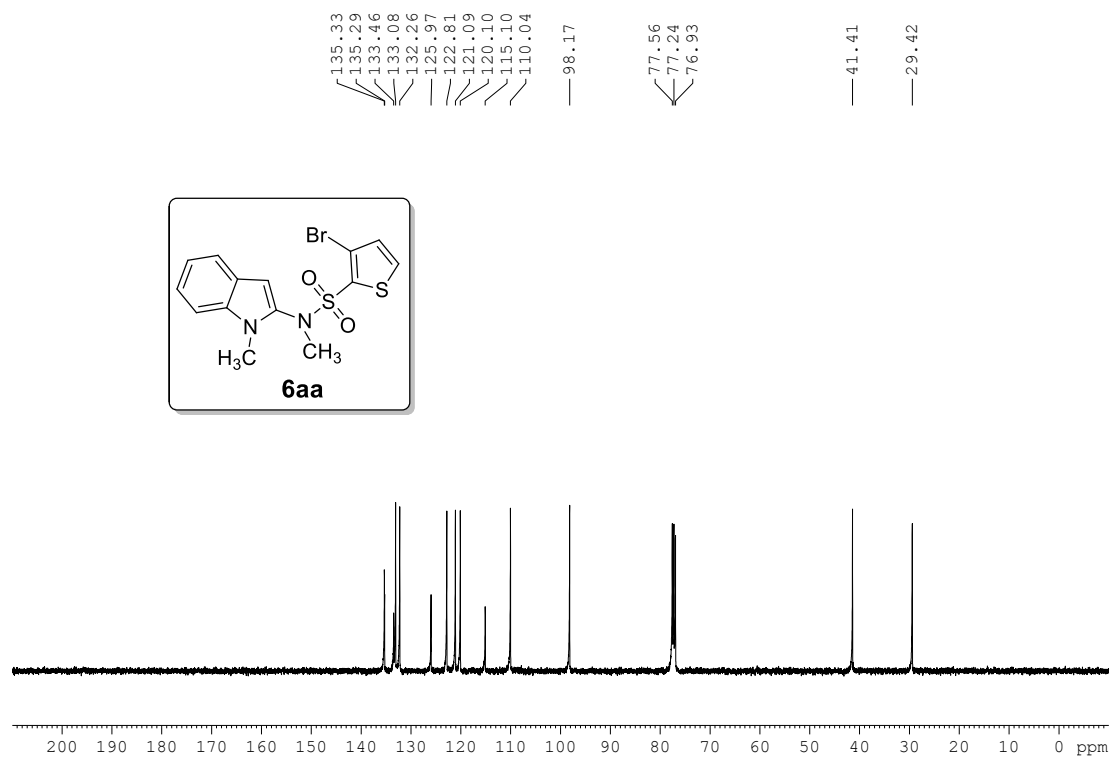

**Figure S50.**  $^{13}\text{C}\{^1\text{H}\}$  NMR spectrum of compound **6aa**

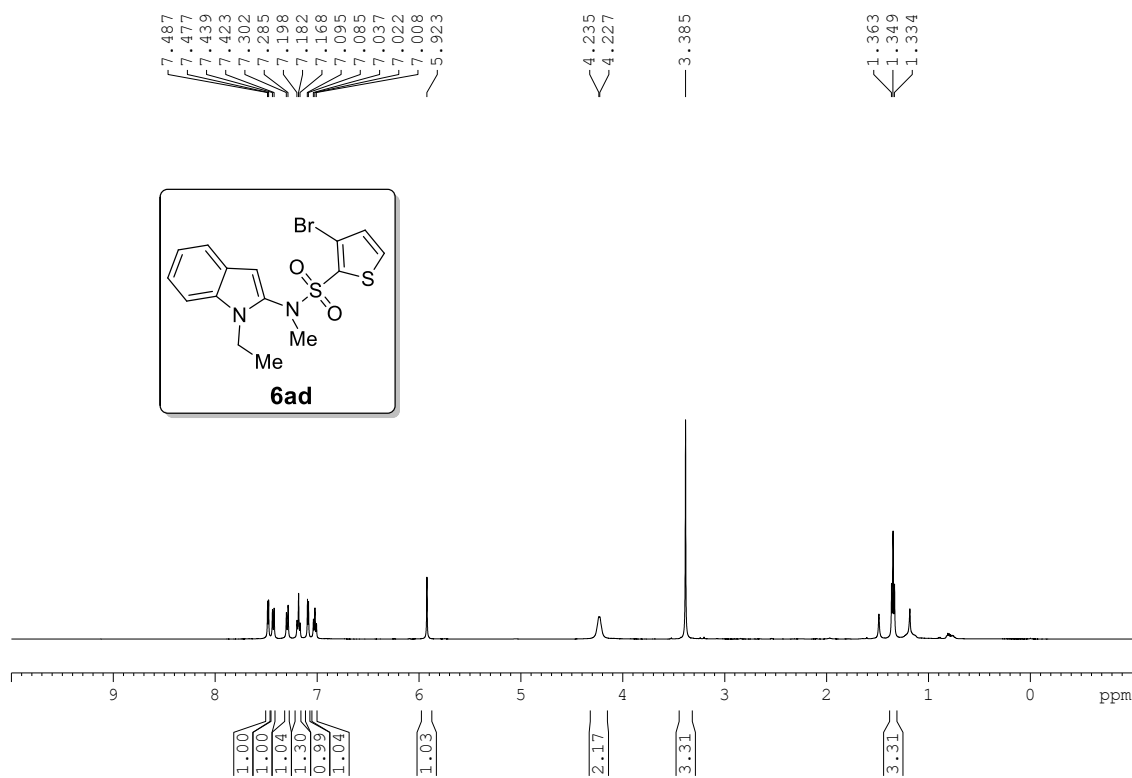

**Figure S51.** <sup>1</sup>H NMR spectrum of compound **6ad**

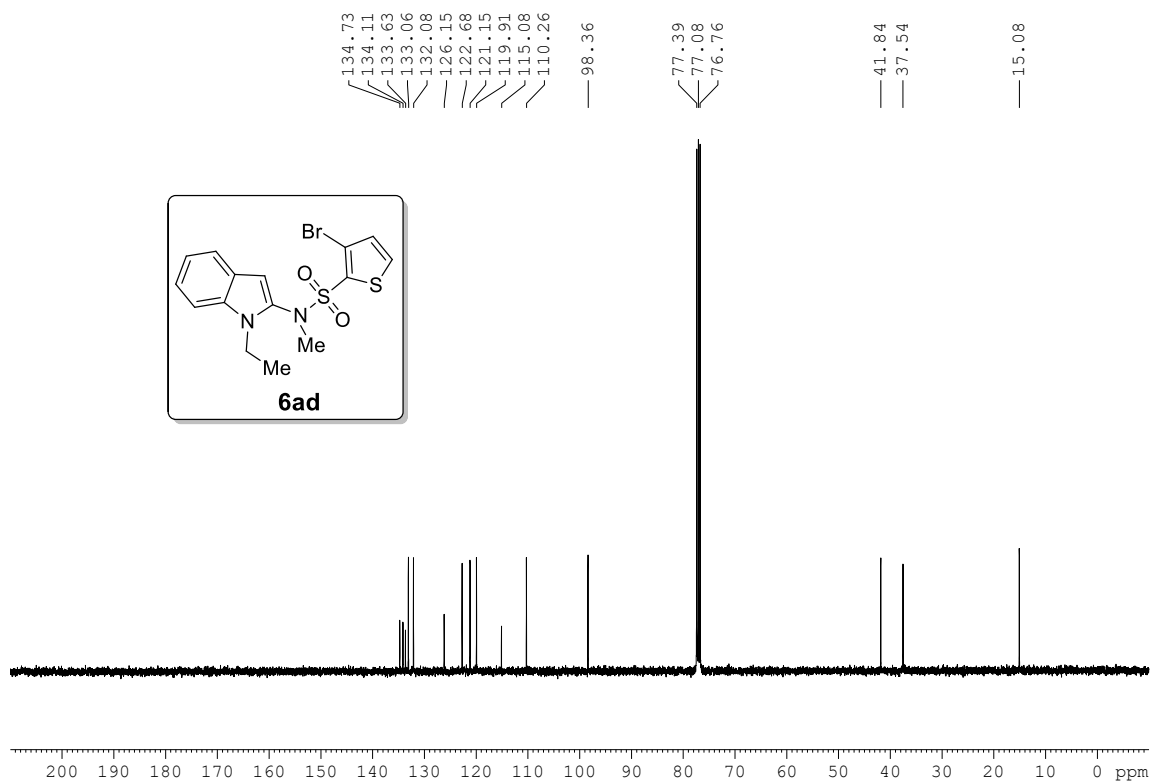

**Figure S52.** <sup>13</sup>C {<sup>1</sup>H} NMR spectrum of compound **6ad**

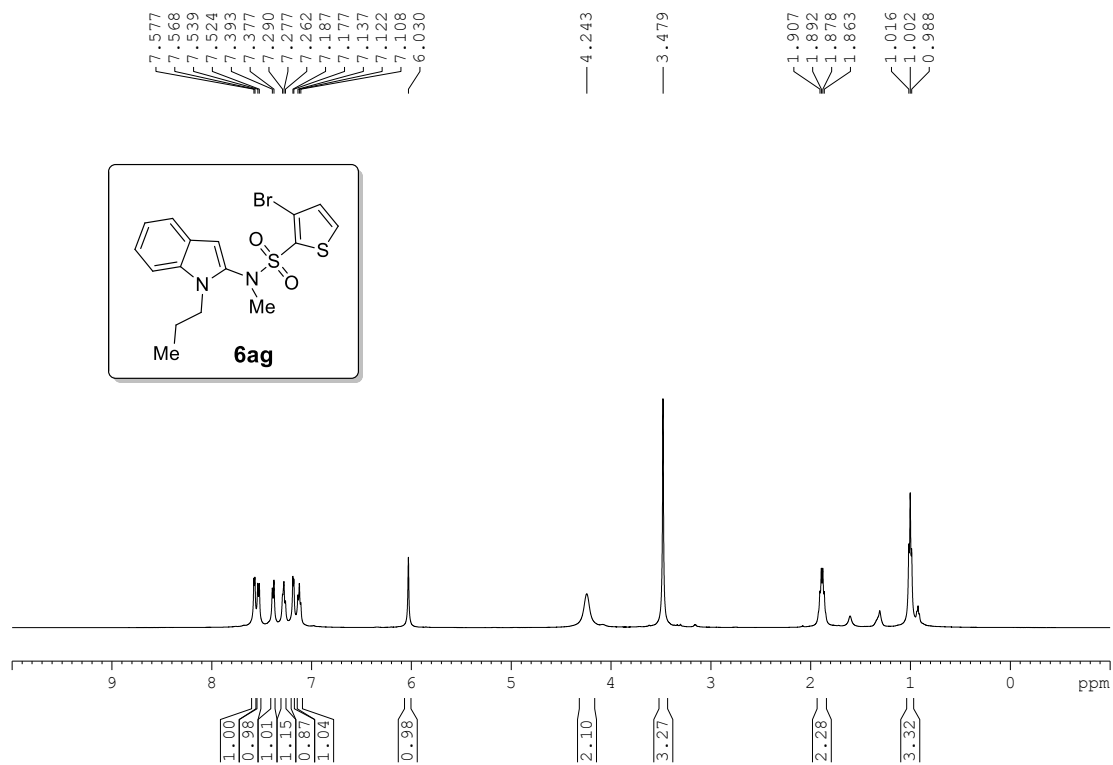

**Figure S53.**  $^1\text{H}$  NMR spectrum of compound **6ag**

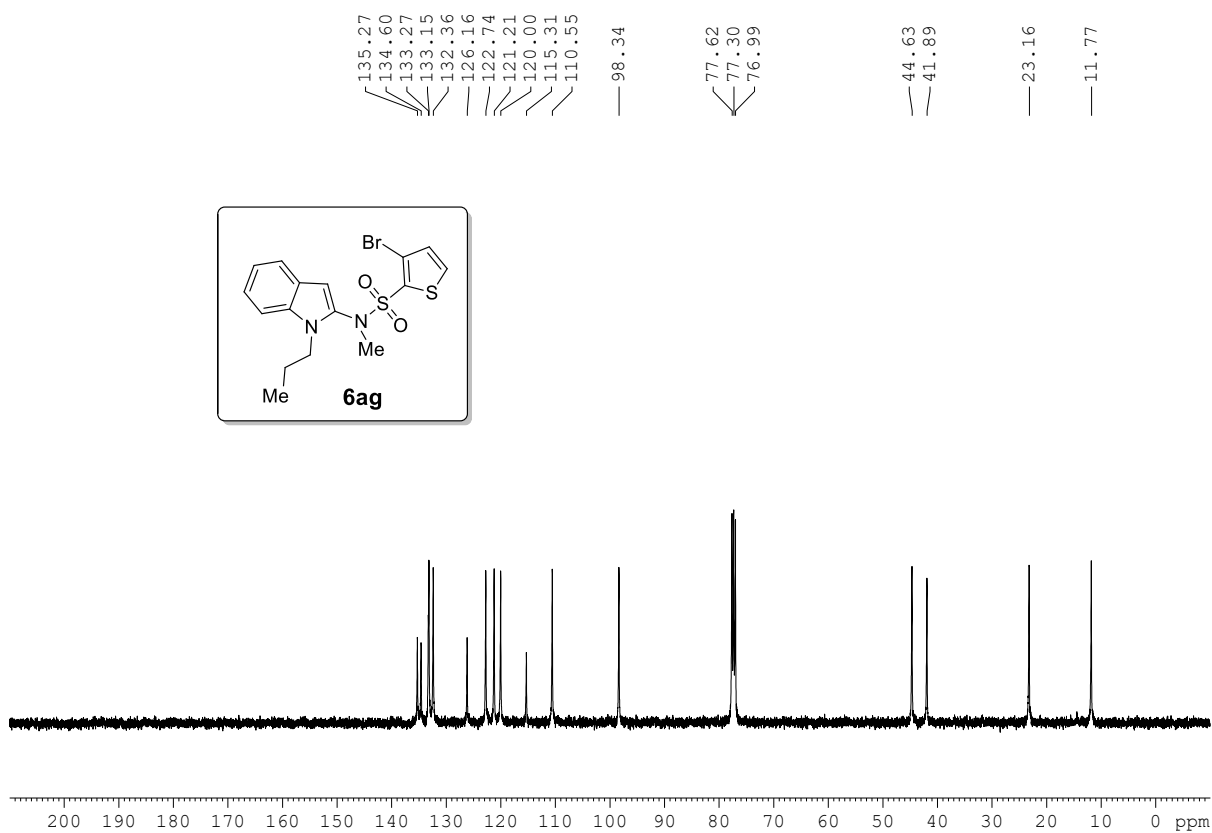

**Figure S54.**  $^{13}\text{C}\{^1\text{H}\}$  NMR spectrum of compound **6ag**

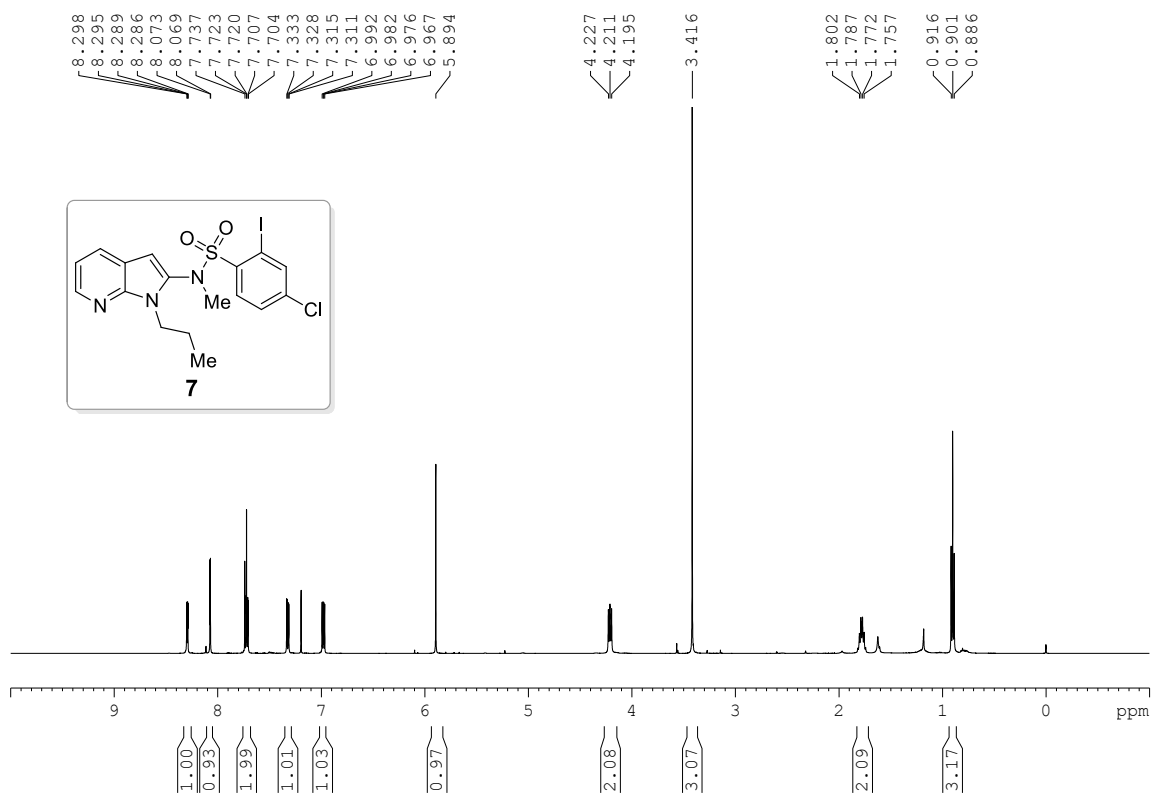

**Figure S55.  $^1\text{H}$  NMR spectrum of compound **7****

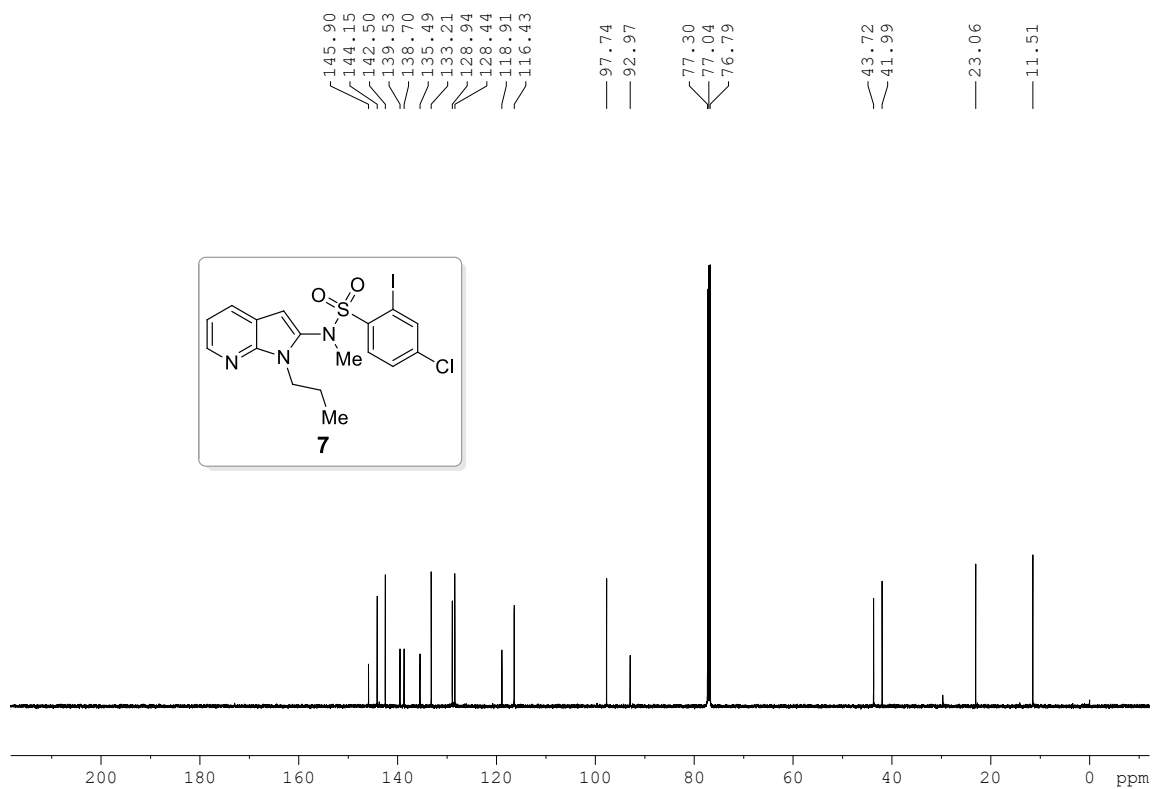

**Figure S56.  $^{13}\text{C}\{^1\text{H}\}$  NMR spectrum of compound **7****

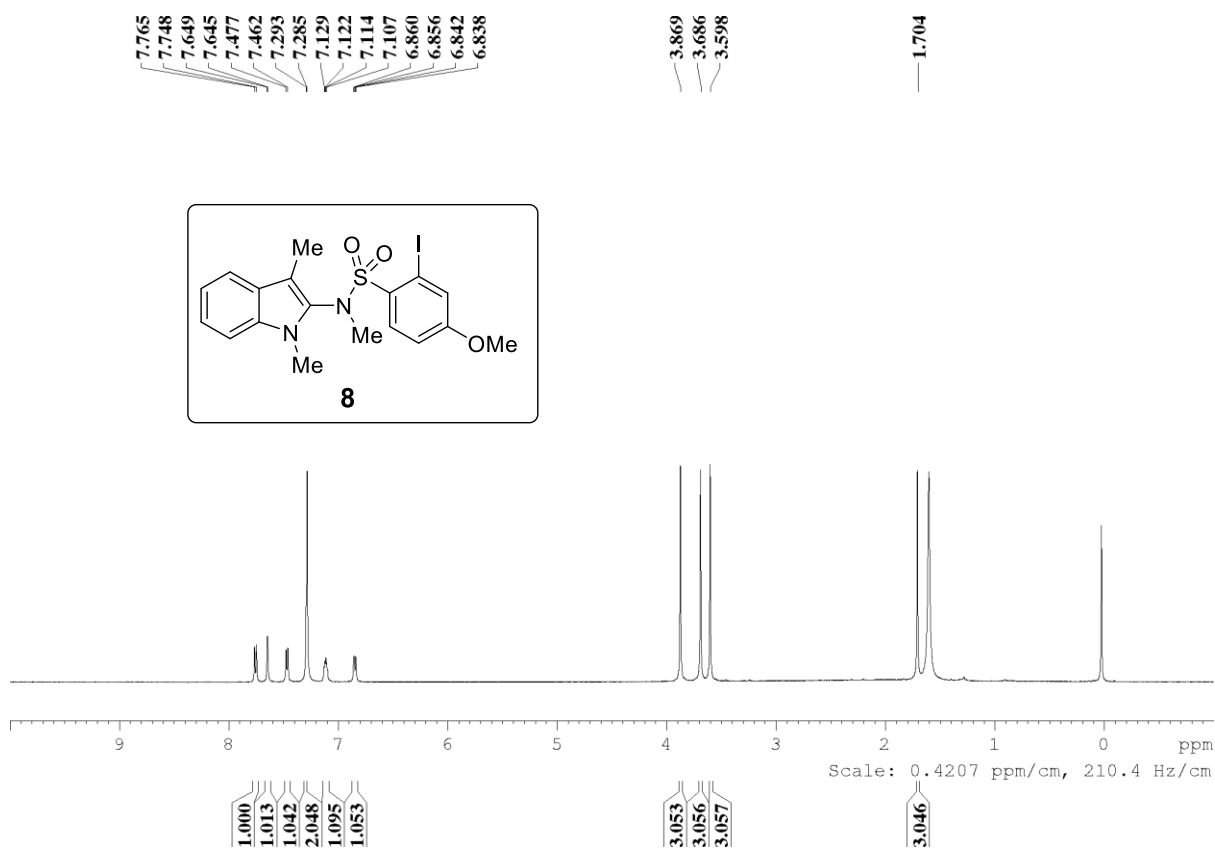

**Figure S57.** <sup>1</sup>H NMR spectrum of compound **8**

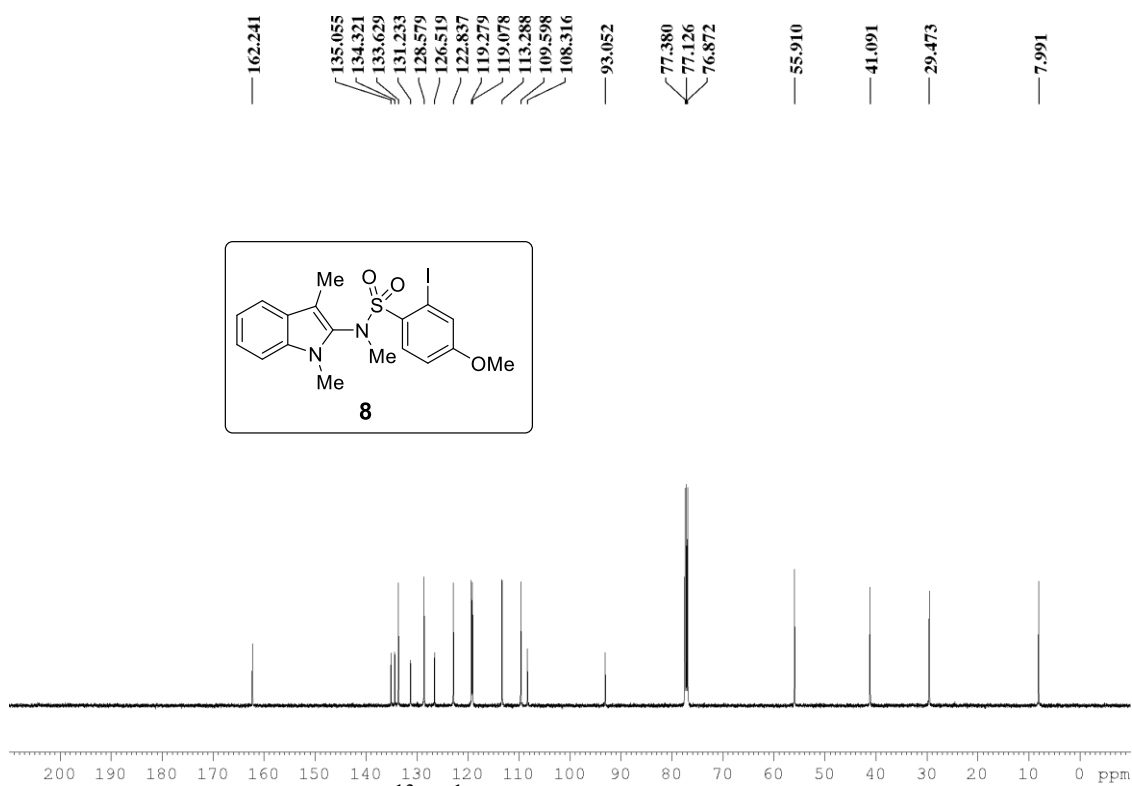

**Figure S58.** <sup>13</sup>C {<sup>1</sup>H} NMR spectrum of compound **8**

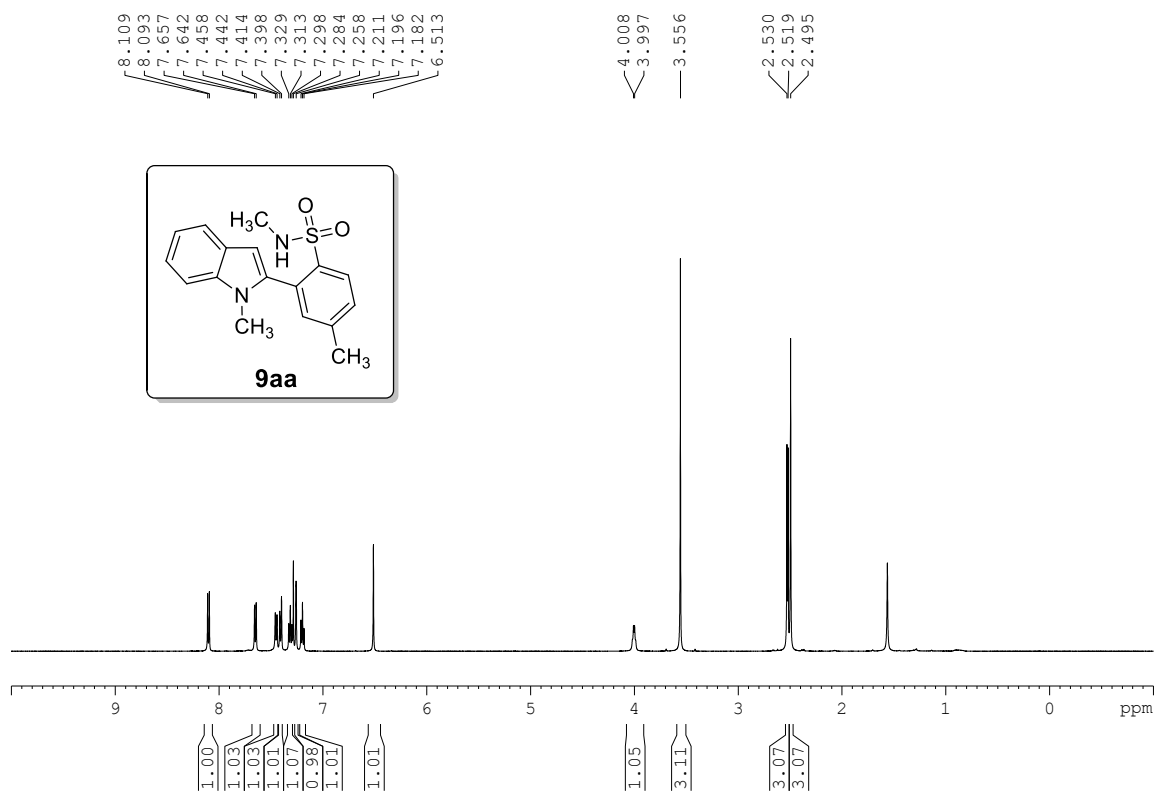

**Figure S59.**  $^1\text{H}$  NMR spectrum of compound **9aa**

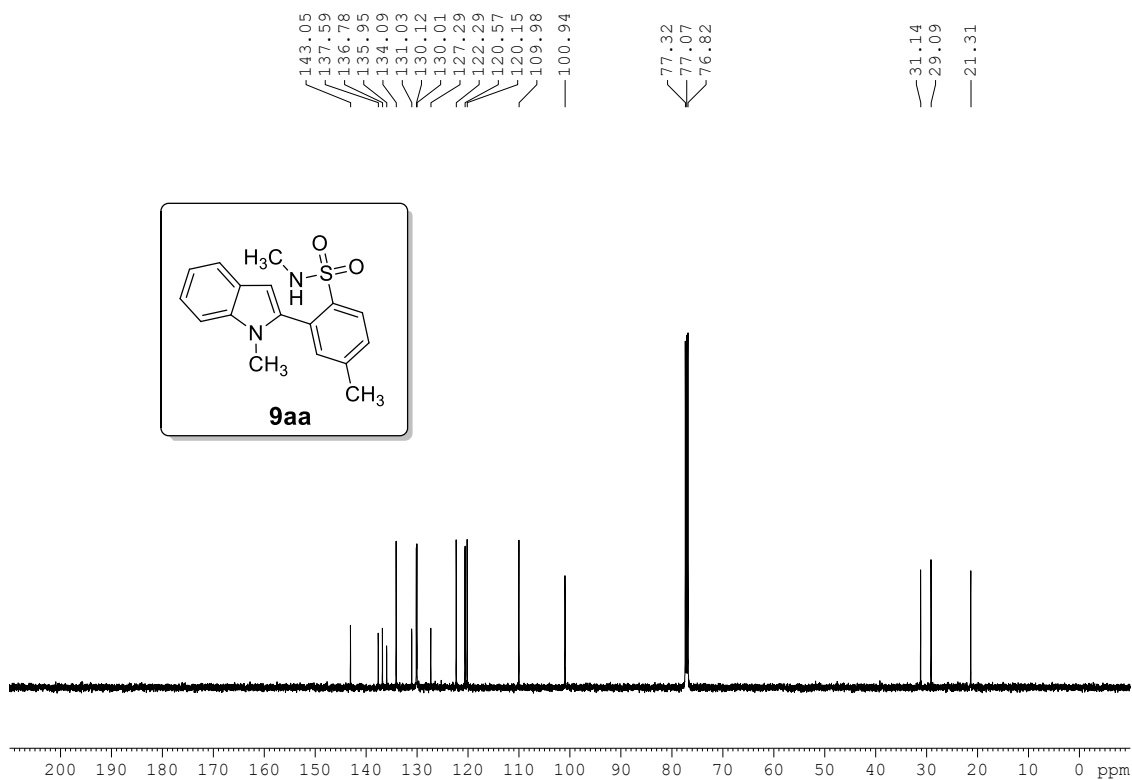

**Figure S60.**  $^{13}\text{C}\{^1\text{H}\}$  NMR spectrum of compound **9aa**

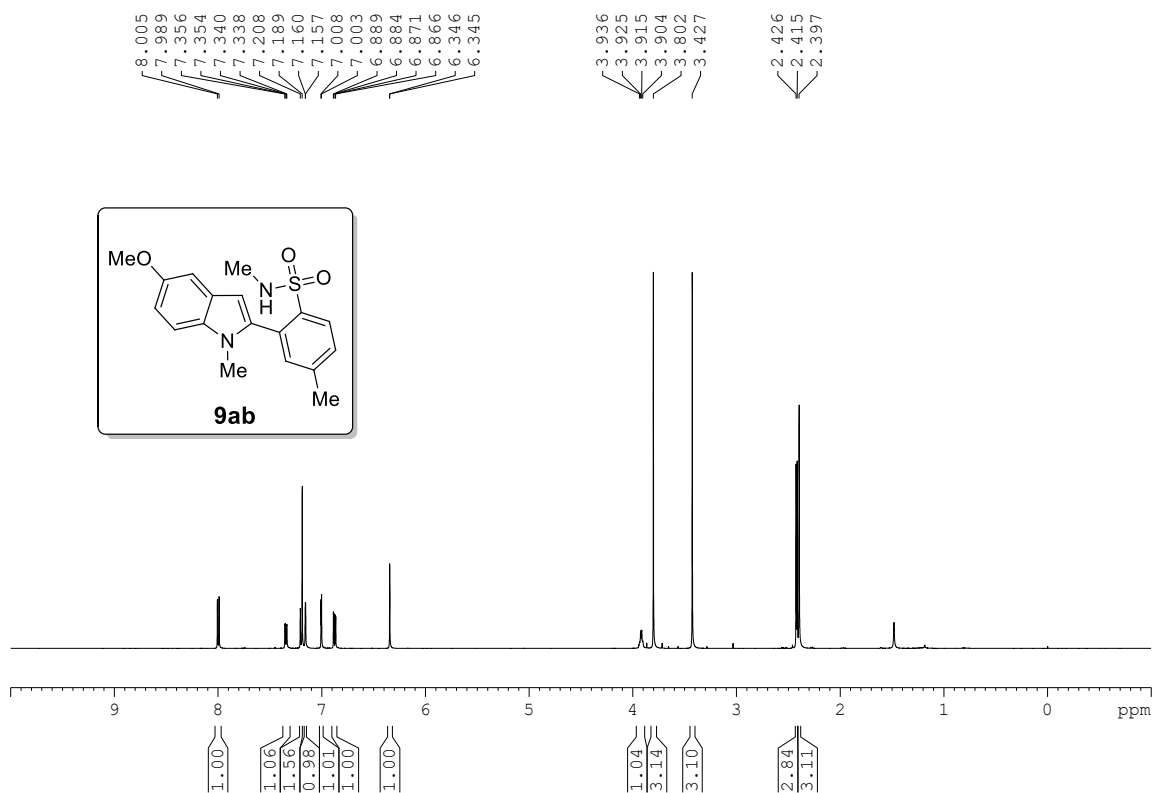

**Figure S61.** <sup>1</sup>H NMR spectrum of compound **9ab**

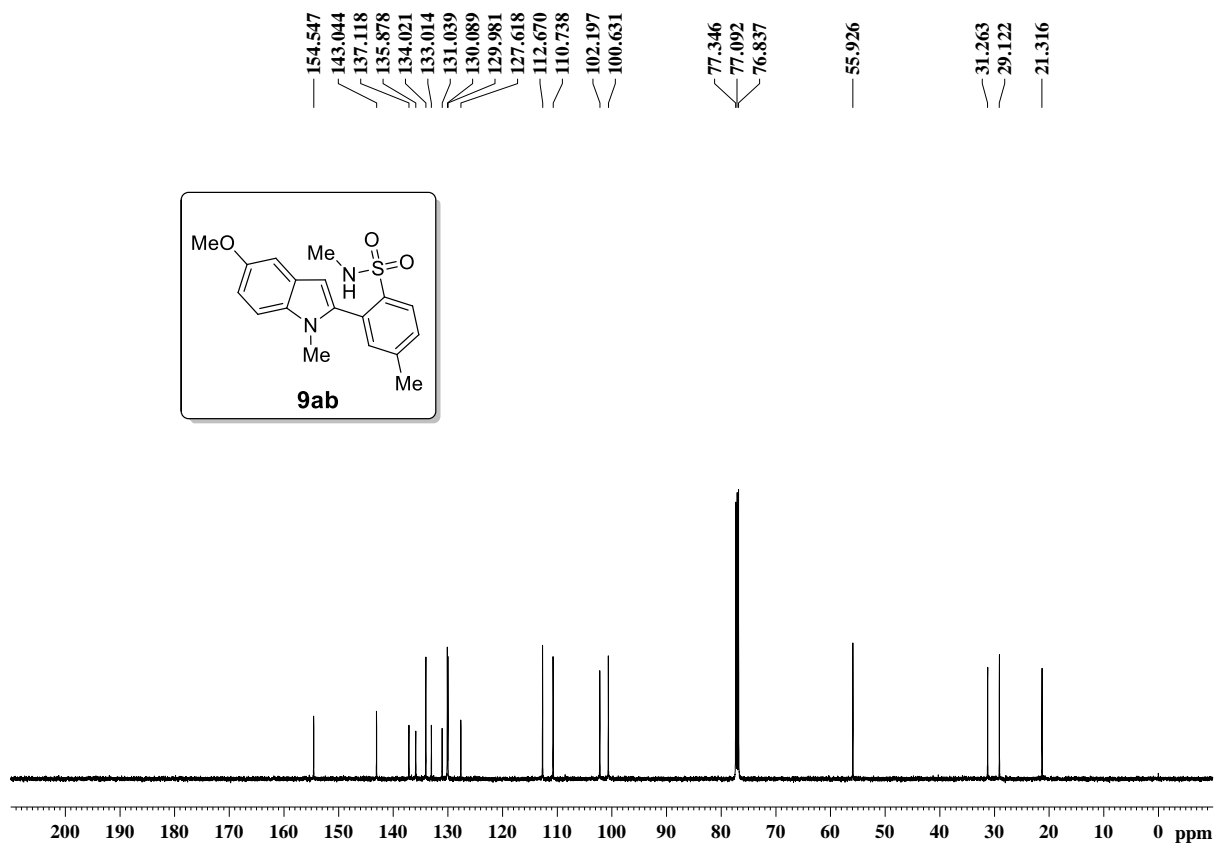

**Figure S62.** <sup>13</sup>C {<sup>1</sup>H} NMR spectrum of compound **9ab**

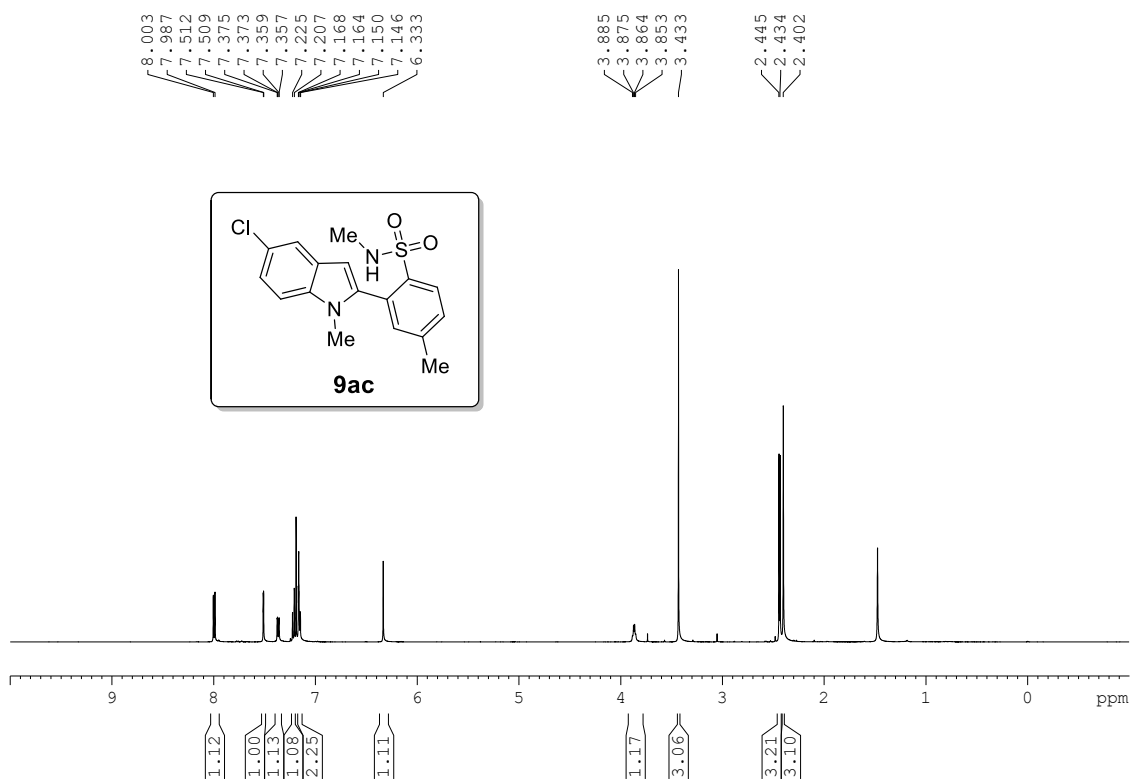

Figure S63.  $^1\text{H}$  NMR spectrum of compound **9ac**

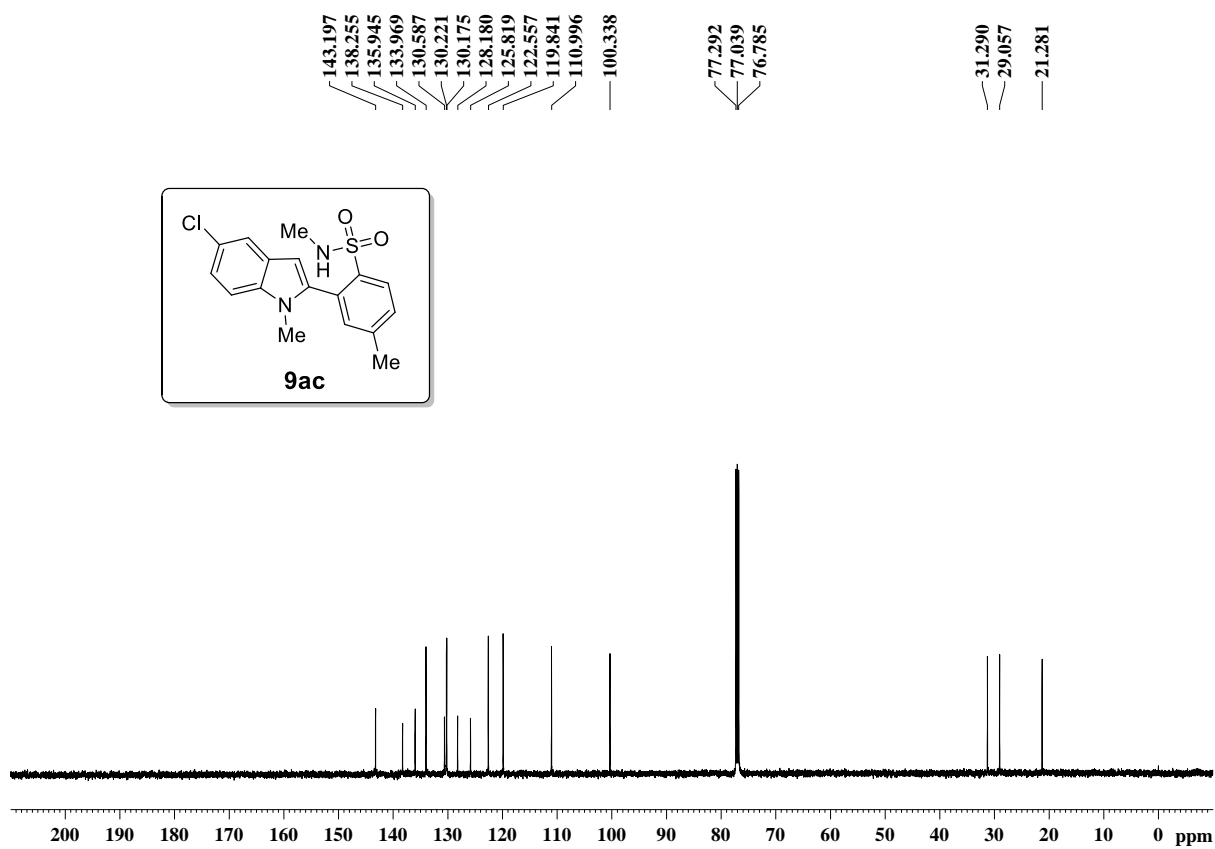

Figure S64.  $^{13}\text{C}\{^1\text{H}\}$  NMR spectrum of compound **9ac**



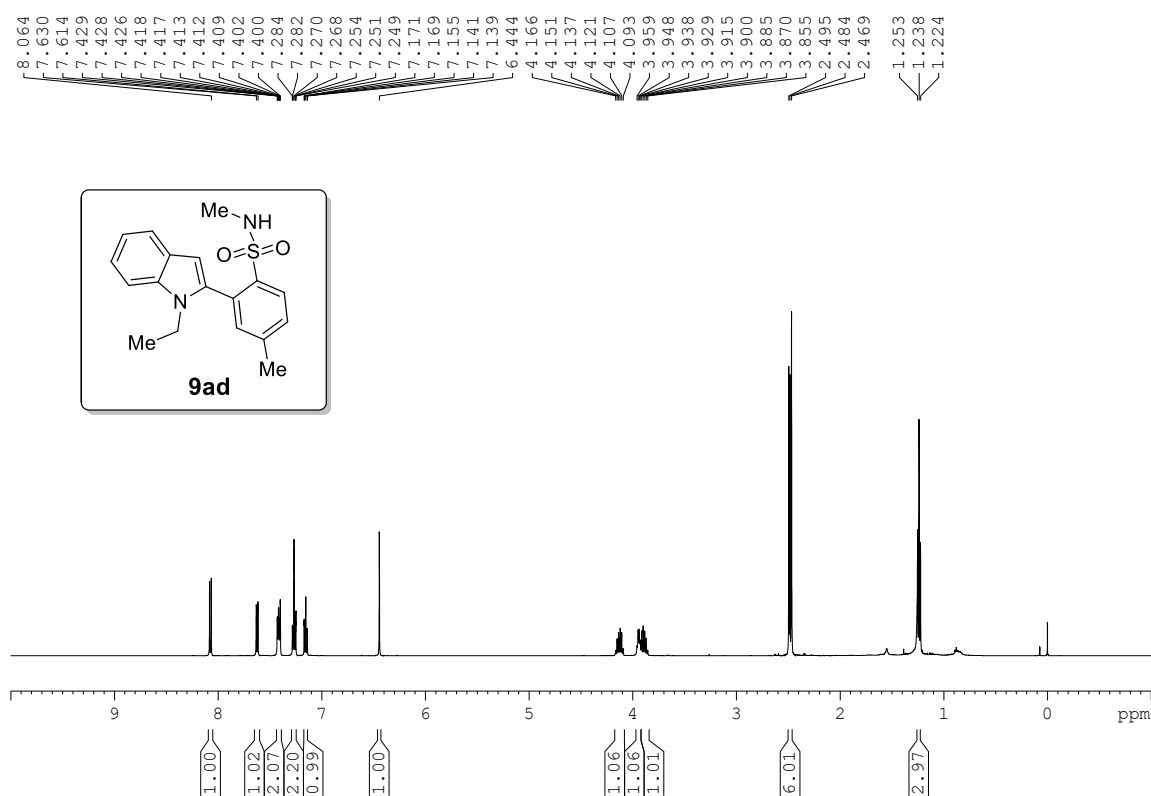

Figure S65. <sup>1</sup>H NMR spectrum of compound **9ad**

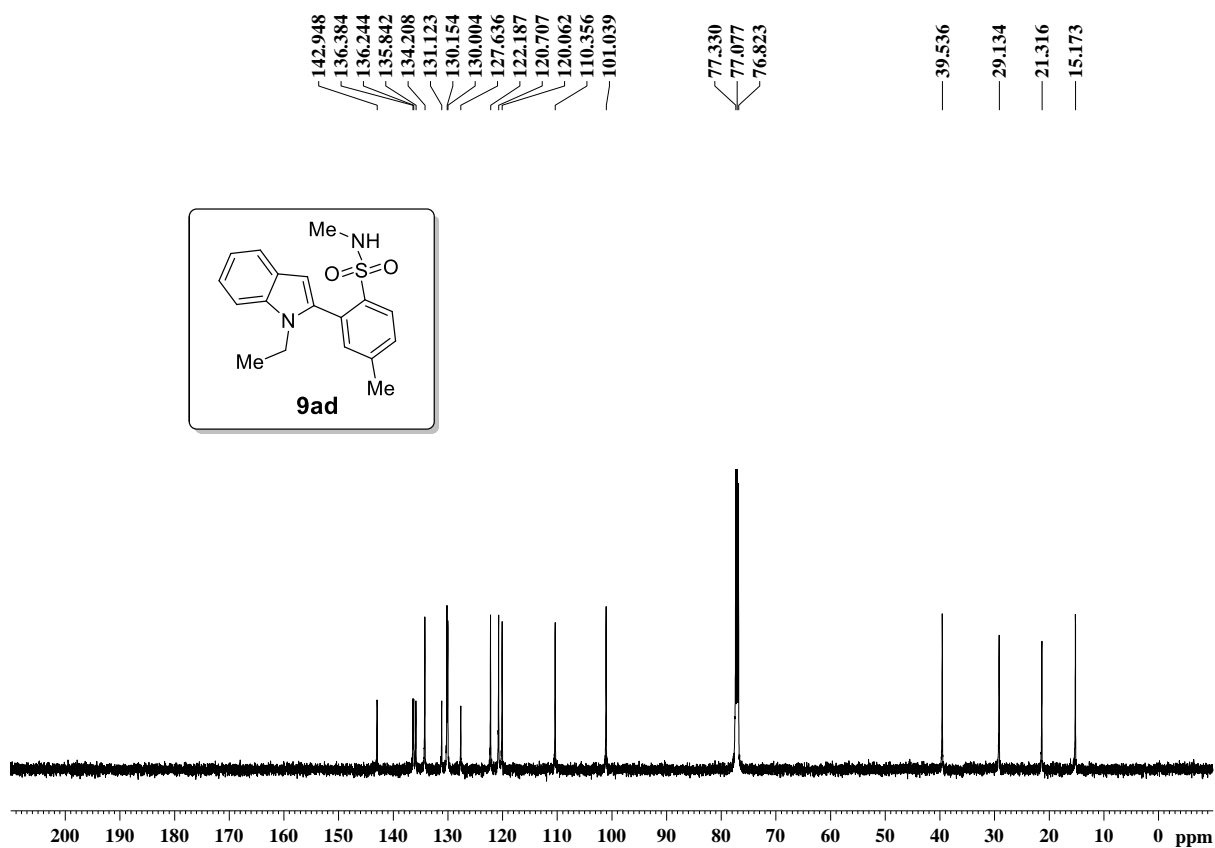

Figure S66. <sup>13</sup>C {<sup>1</sup>H} NMR spectrum of compound **9ad**

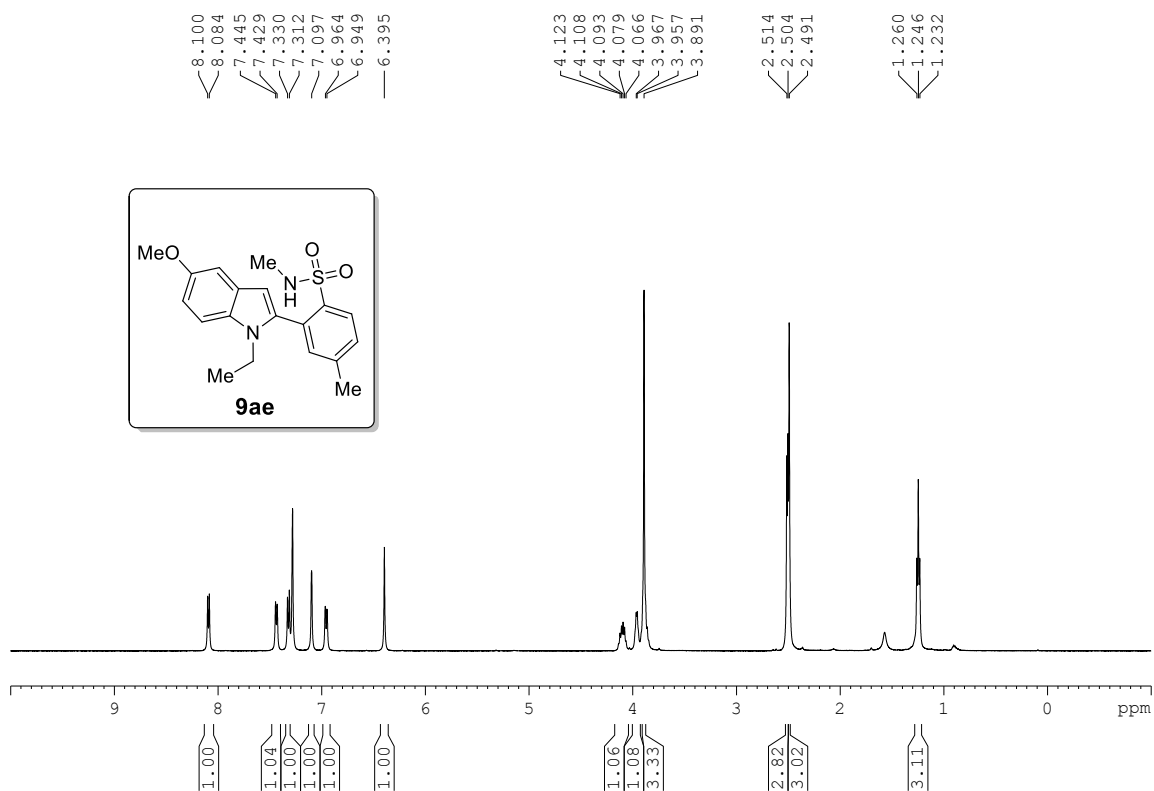

Figure S67. <sup>1</sup>H NMR spectrum of compound **9ae**

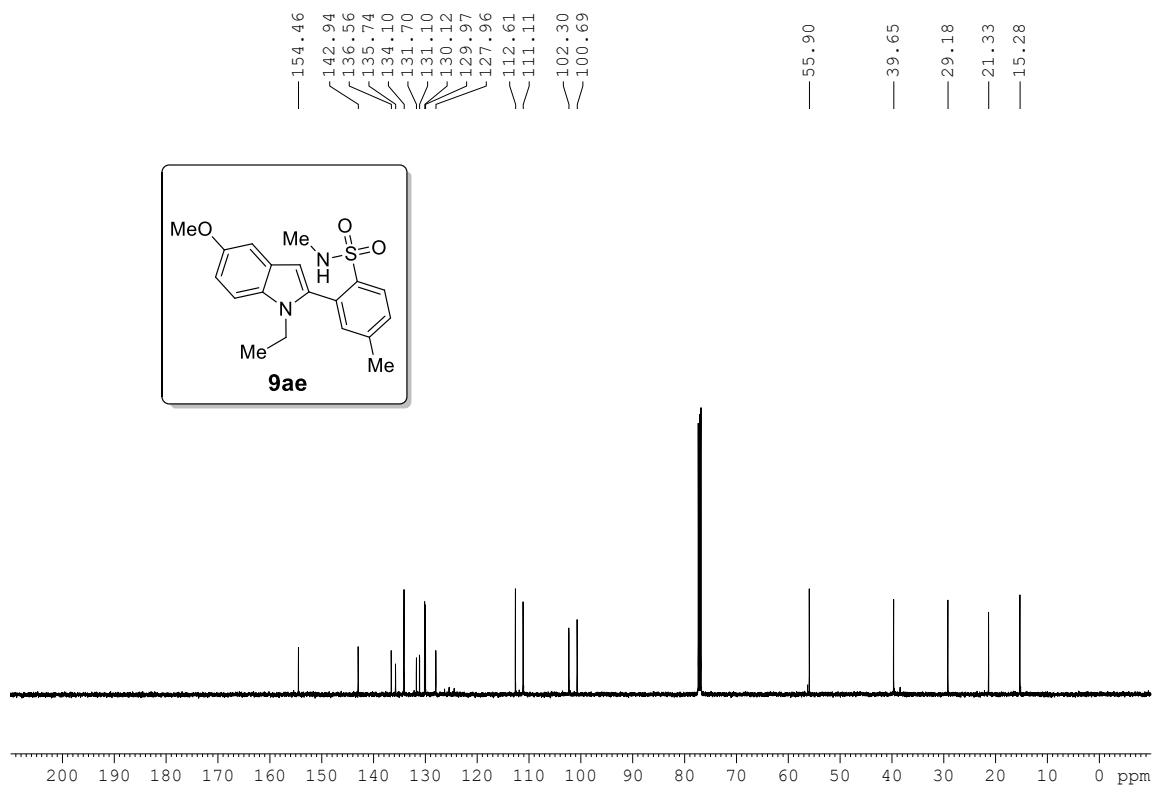

Figure S68. <sup>13</sup>C {<sup>1</sup>H} NMR spectrum of compound **9ae**

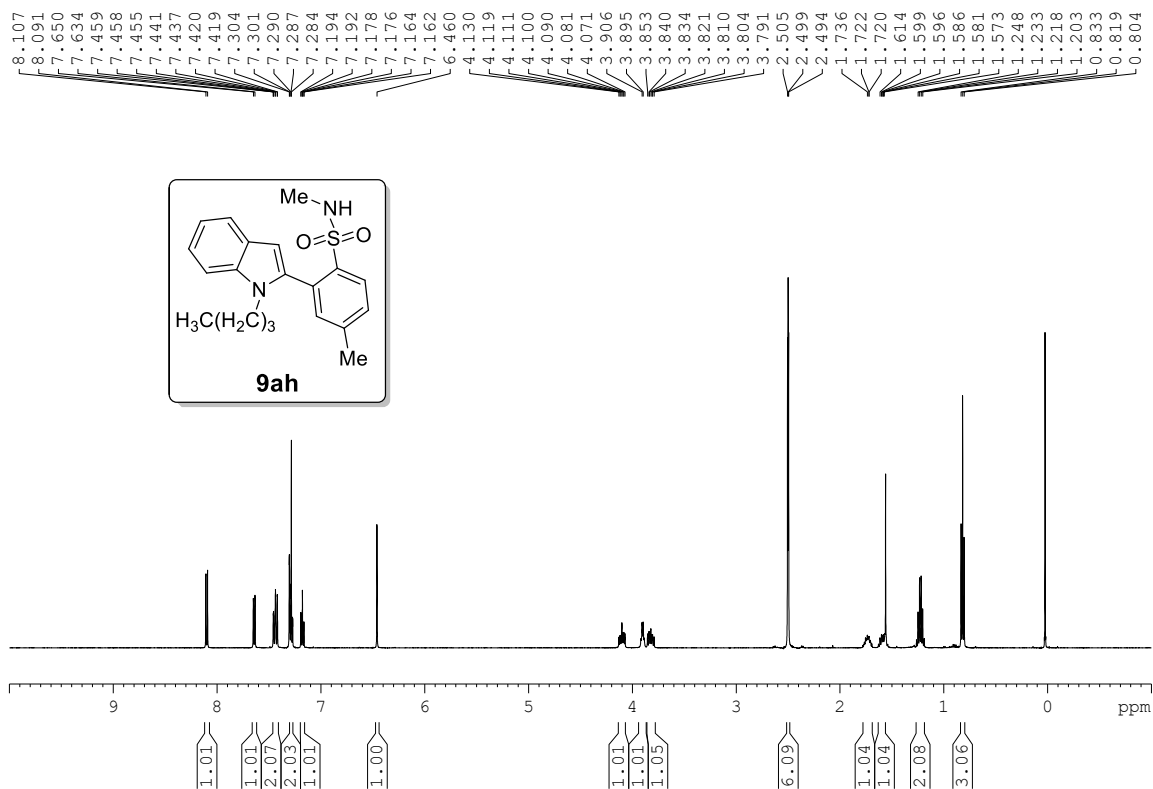

**Figure S69.** <sup>1</sup>H NMR spectrum of compound **9ah**

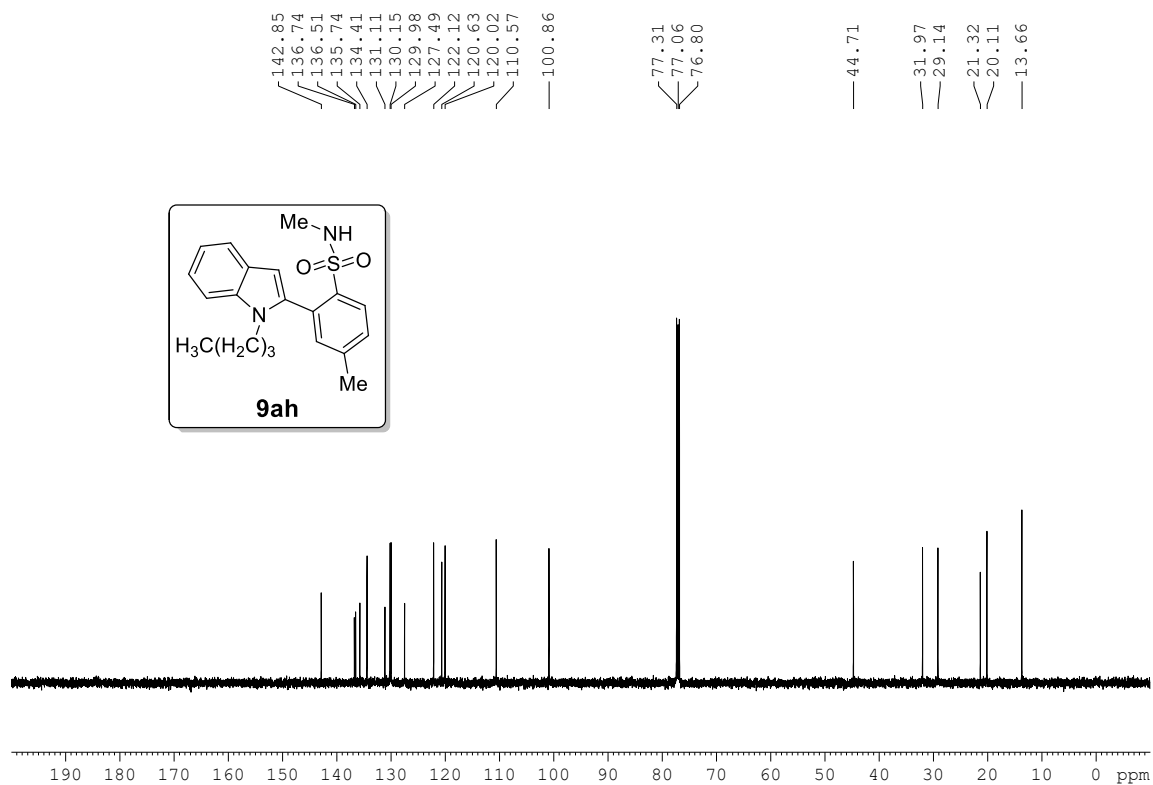

**Figure S70.** <sup>13</sup>C {<sup>1</sup>H} NMR spectrum of compound **9ah**

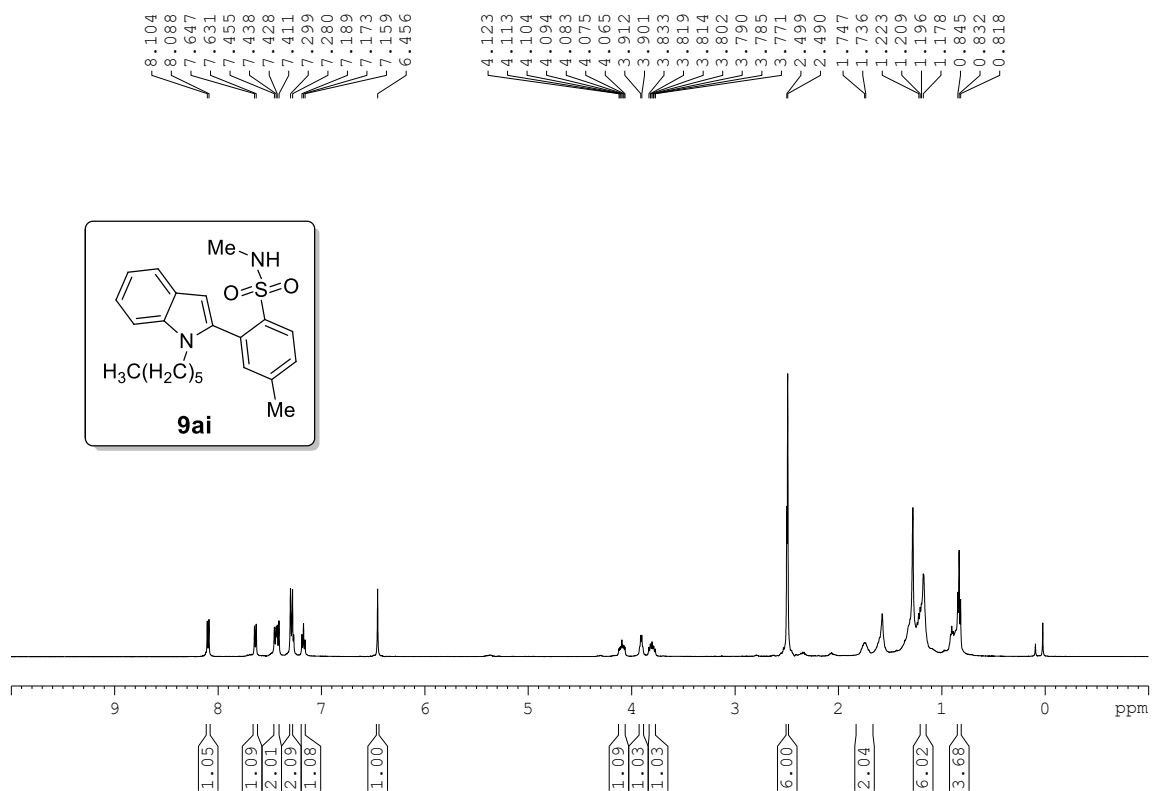

**Figure S71.** <sup>1</sup>H NMR spectrum of compound **9ai**

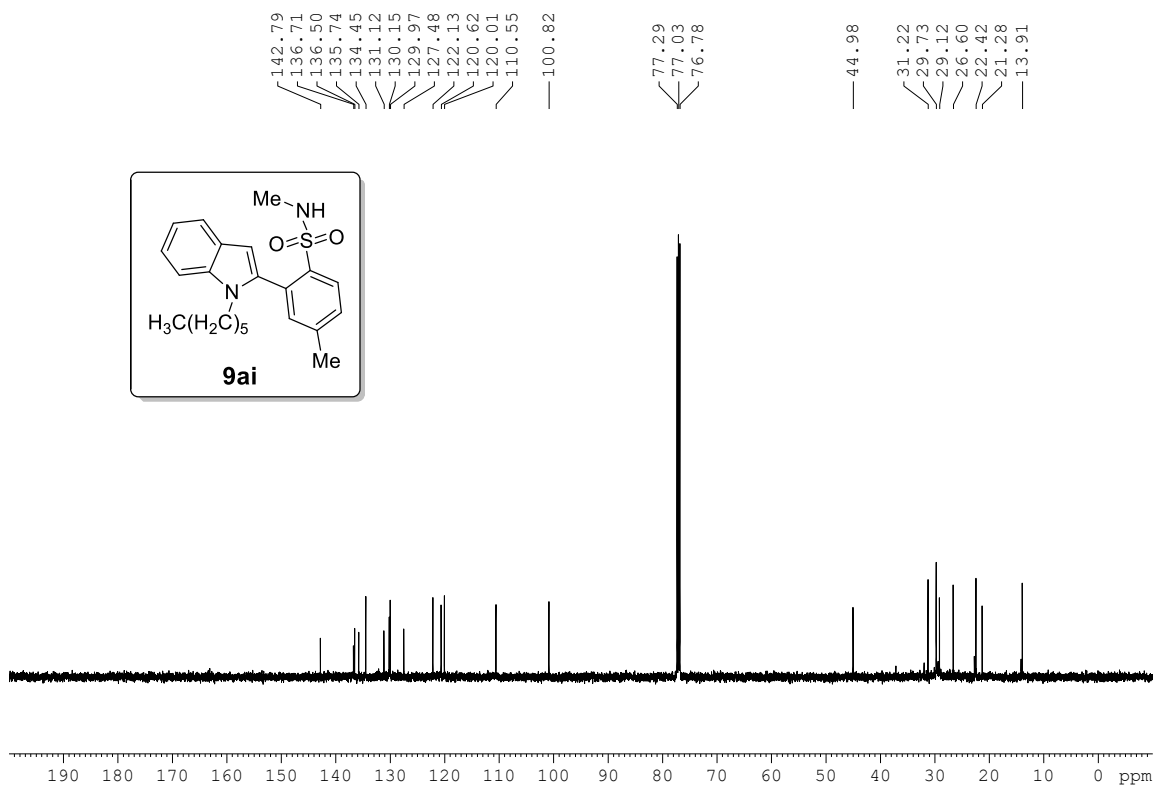

**Figure S72.** <sup>13</sup>C{<sup>1</sup>H} NMR spectrum of compound **9ai**

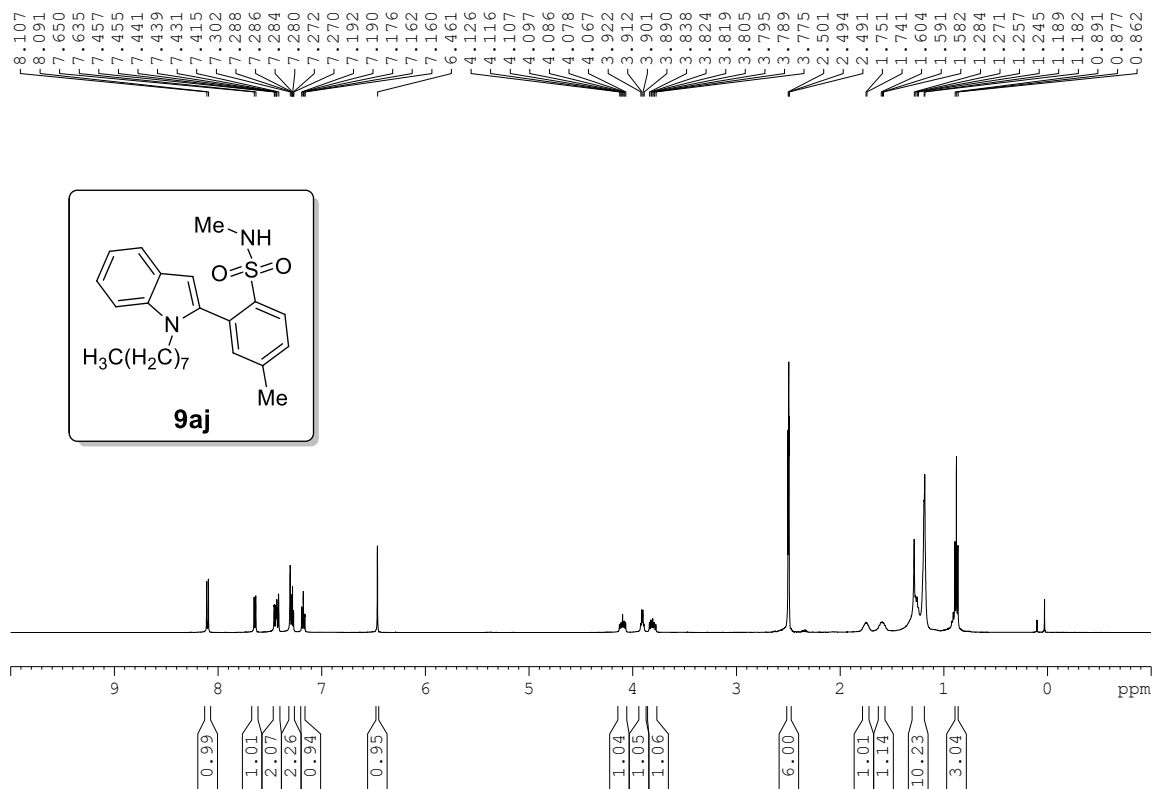

**Figure S73.** <sup>1</sup>H NMR spectrum of compound **9aj**

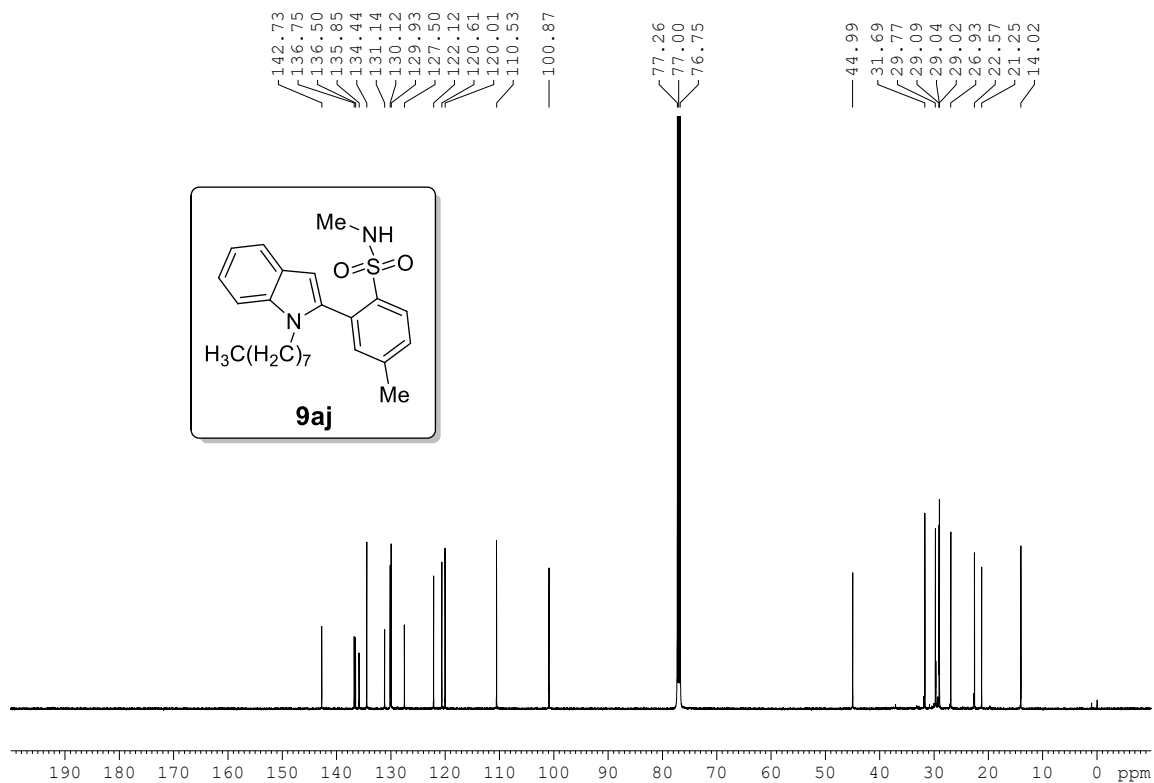

**Figure S74.** <sup>13</sup>C{<sup>1</sup>H} NMR spectrum of compound **9aj**

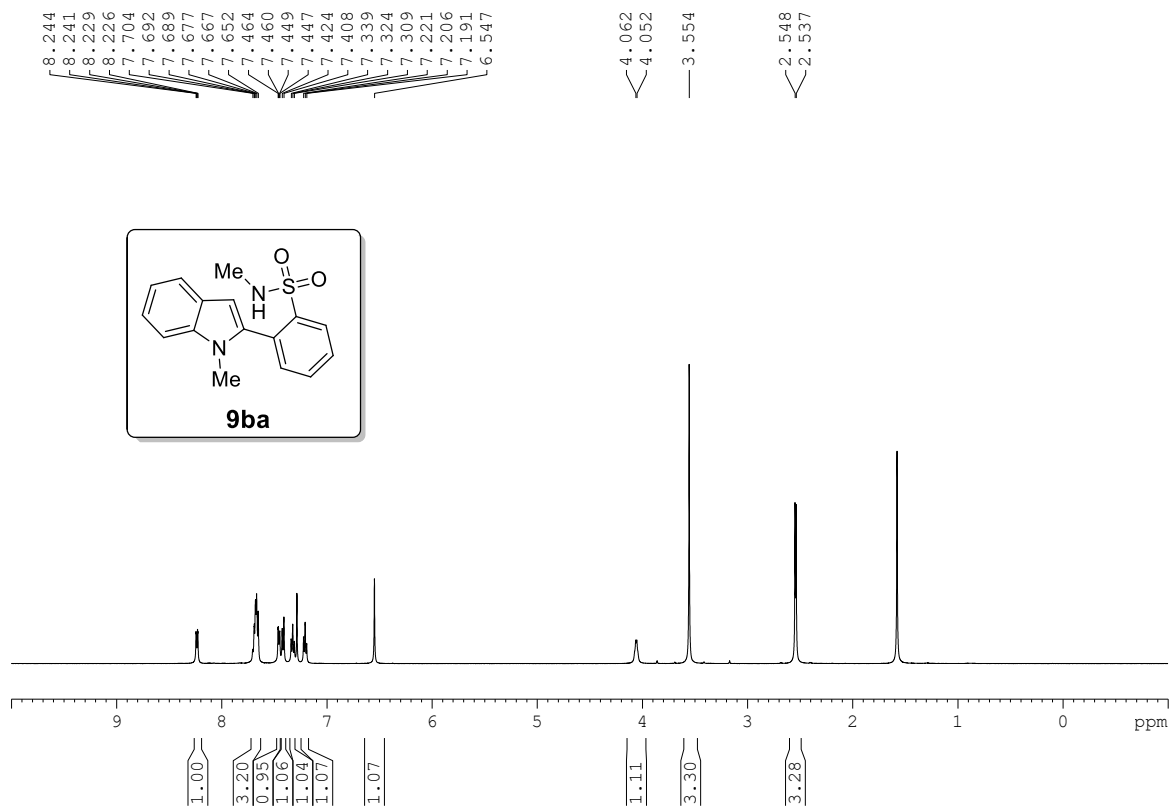

**Figure S75.**  $^1\text{H}$  NMR spectrum of compound **9ba**

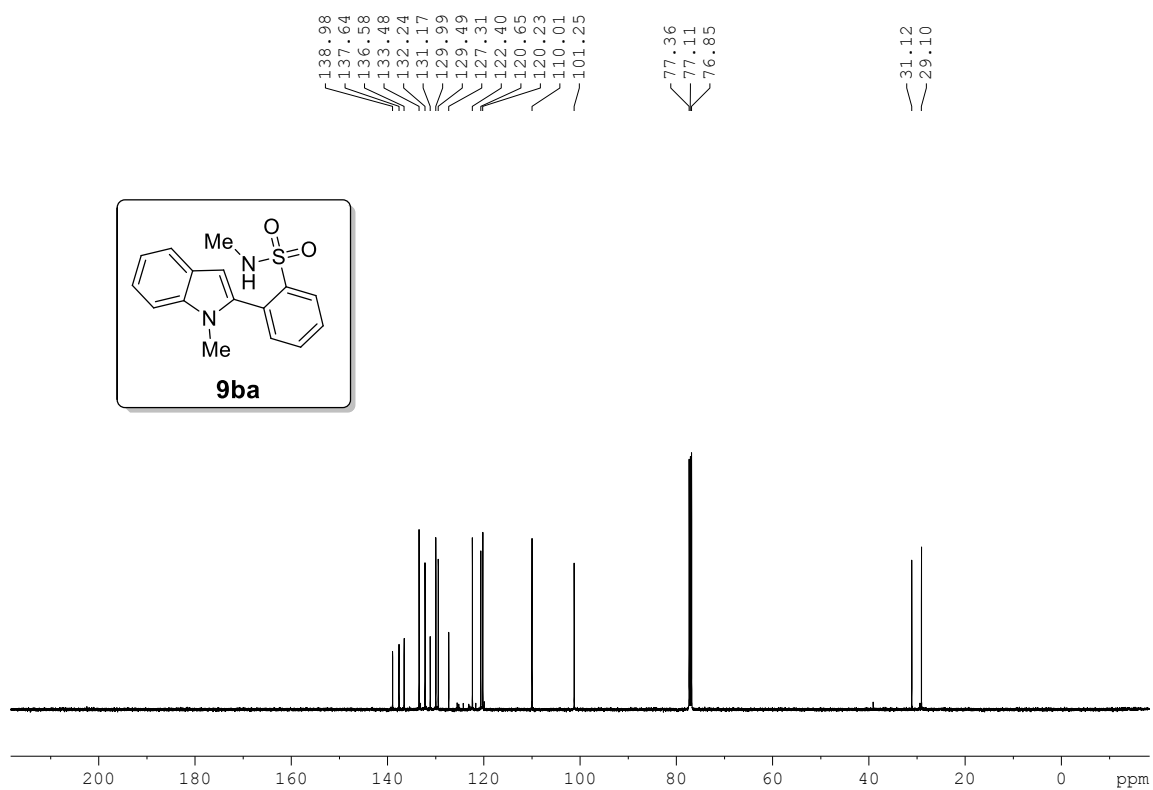

**Figure S76.**  $^{13}\text{C}\{^1\text{H}\}$  NMR spectrum of compound **9ba**

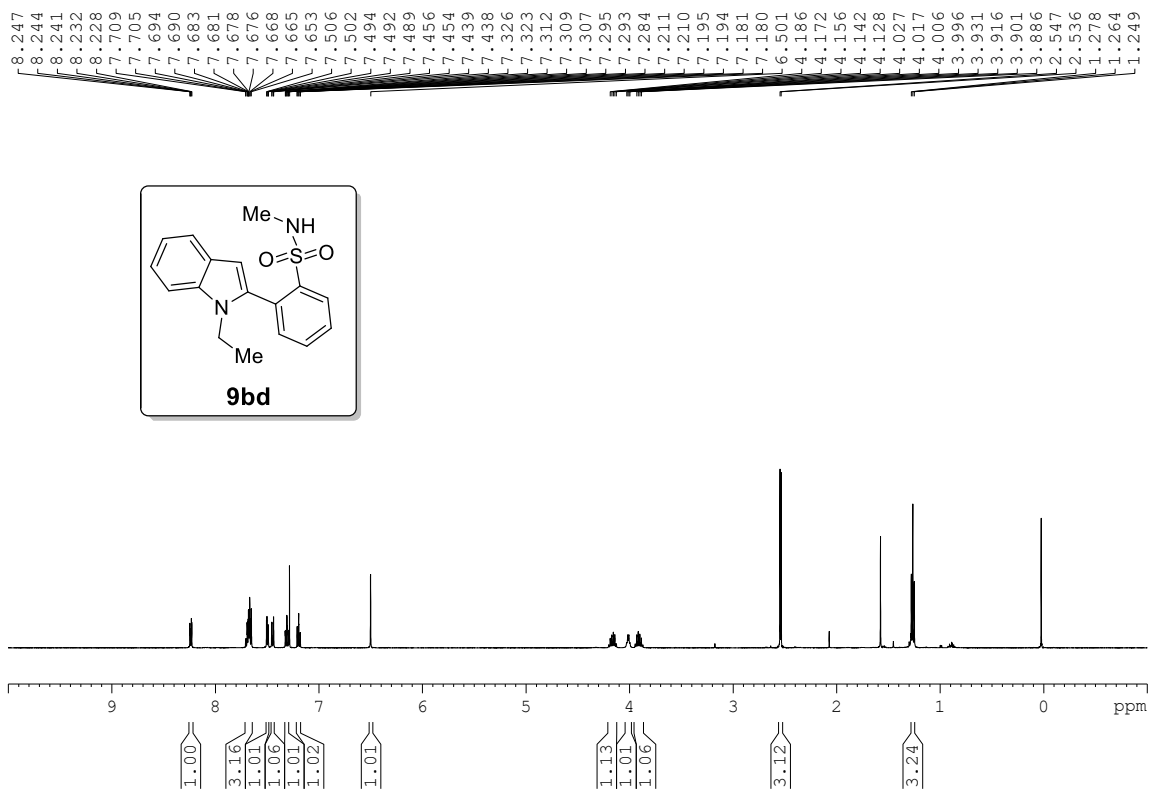

**Figure S77.**  $^1\text{H}$  NMR spectrum of compound **9bd**

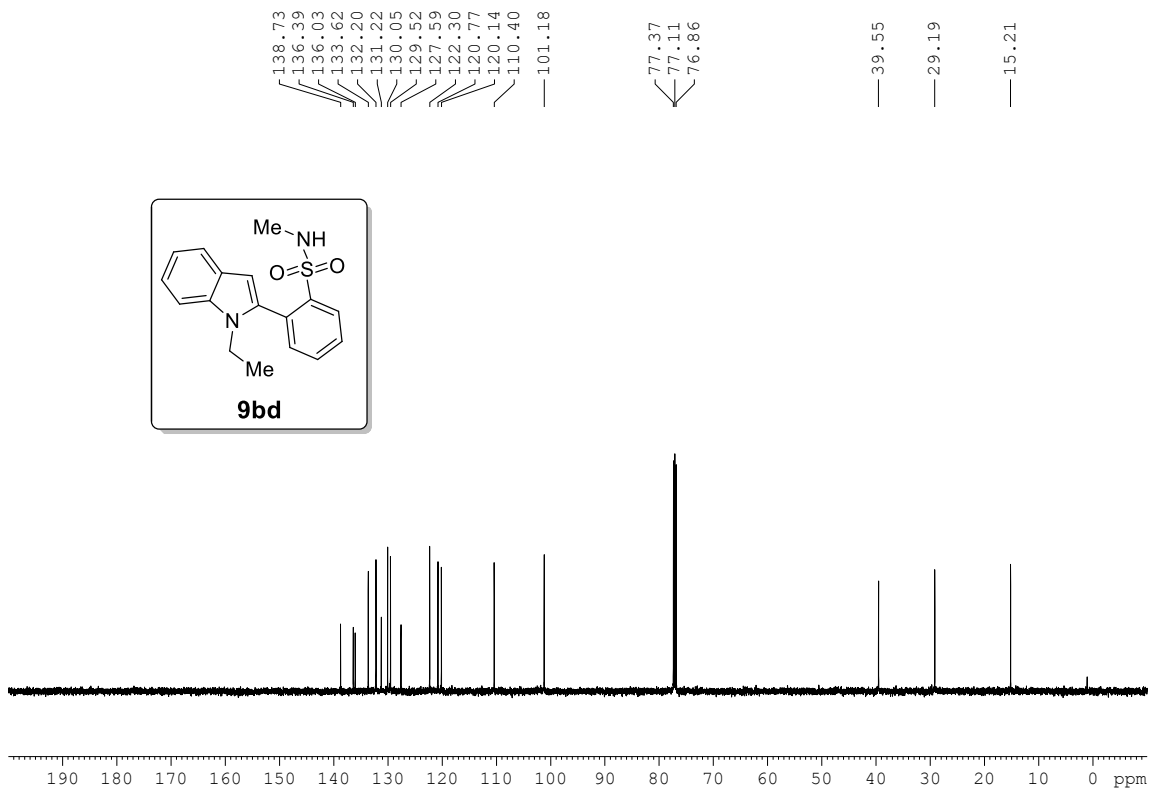

**Figure S78.**  $^{13}\text{C}\{^1\text{H}\}$  NMR spectrum of compound **9bd**

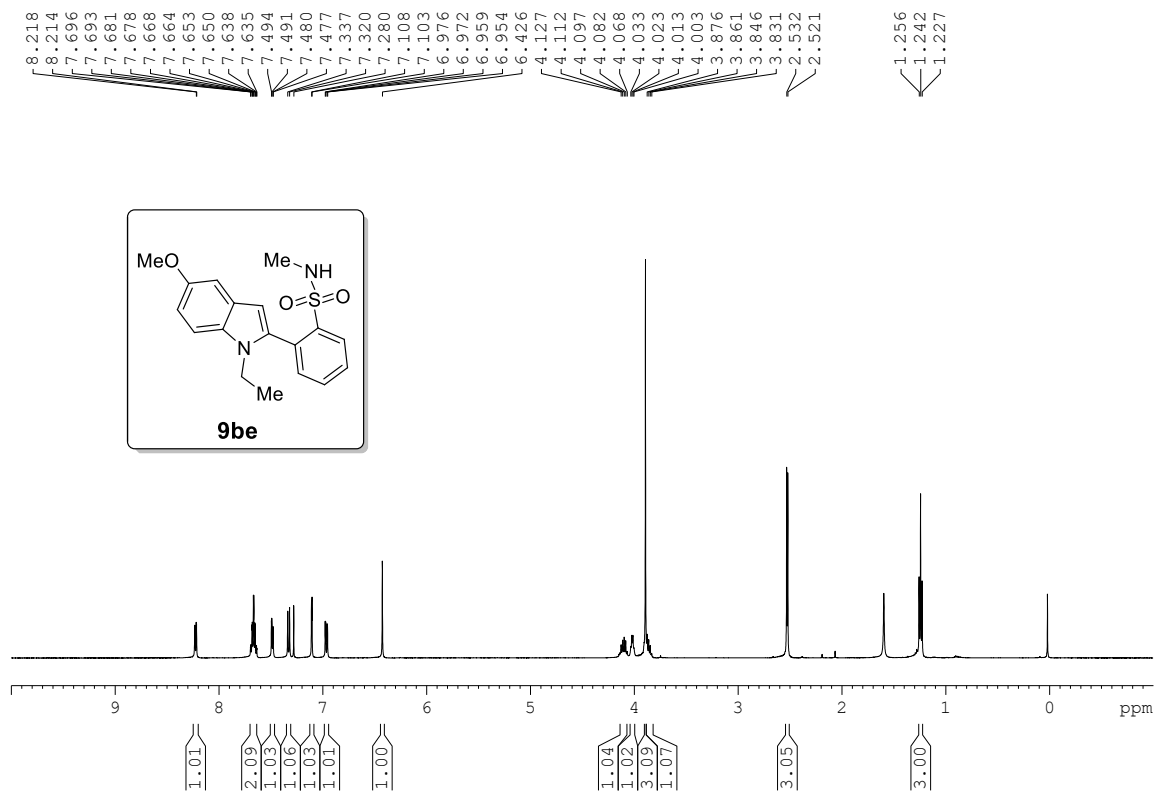

**Figure S79.** <sup>1</sup>H NMR spectrum of compound **9be**

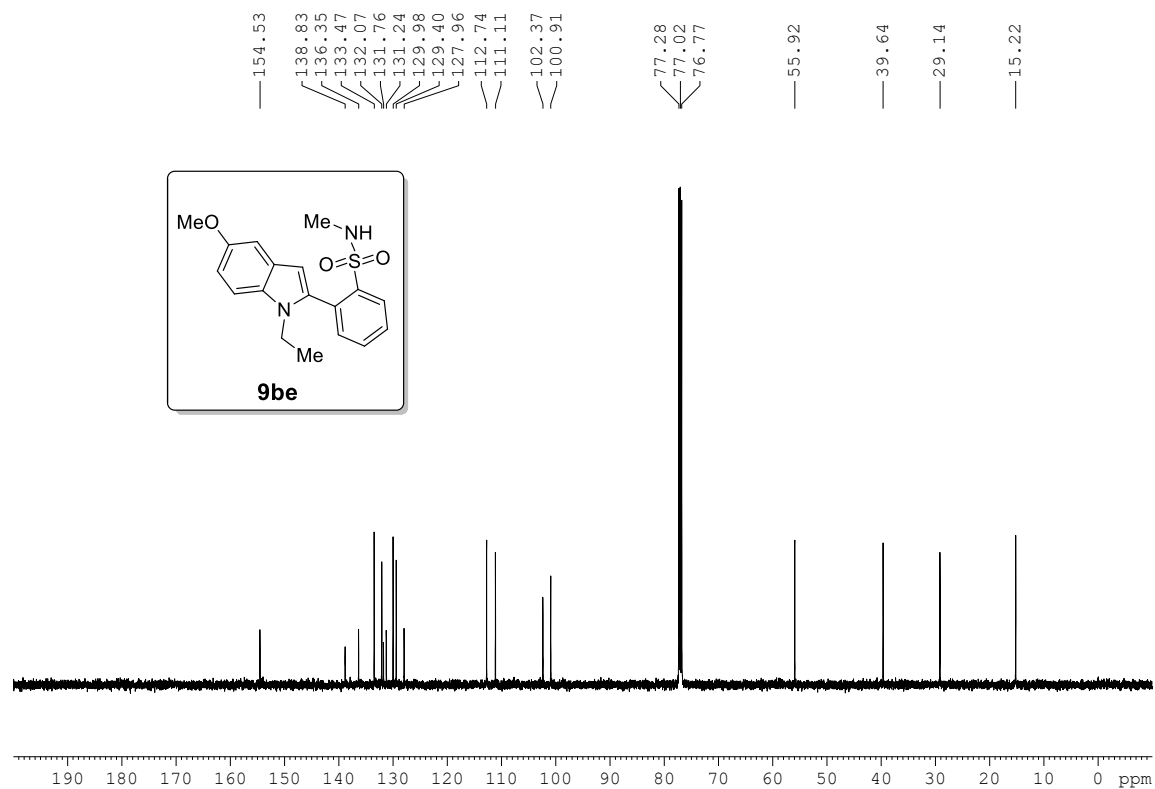

**Figure S80.** <sup>13</sup>C{<sup>1</sup>H} NMR spectrum of compound **9be**



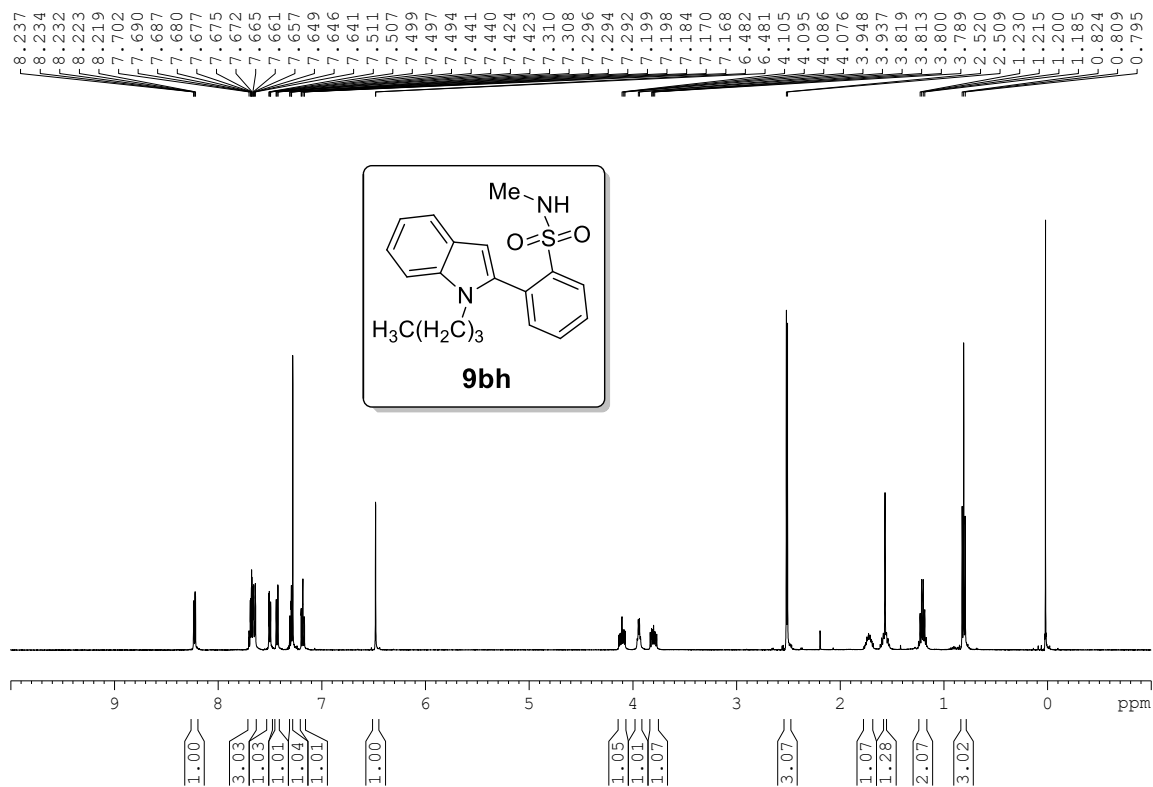

**Figure S81.** <sup>1</sup>H NMR spectrum of compound **9bh**

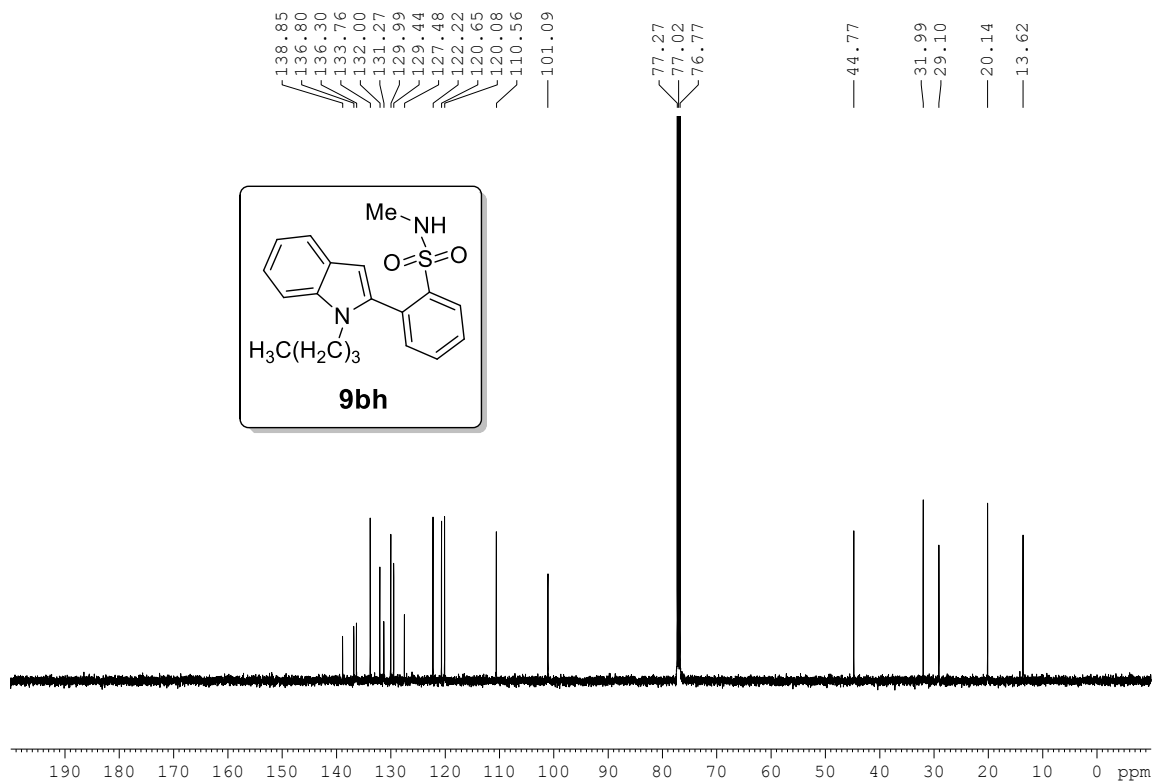

**Figure S82.** <sup>13</sup>C {<sup>1</sup>H} NMR spectrum of compound **9bh**

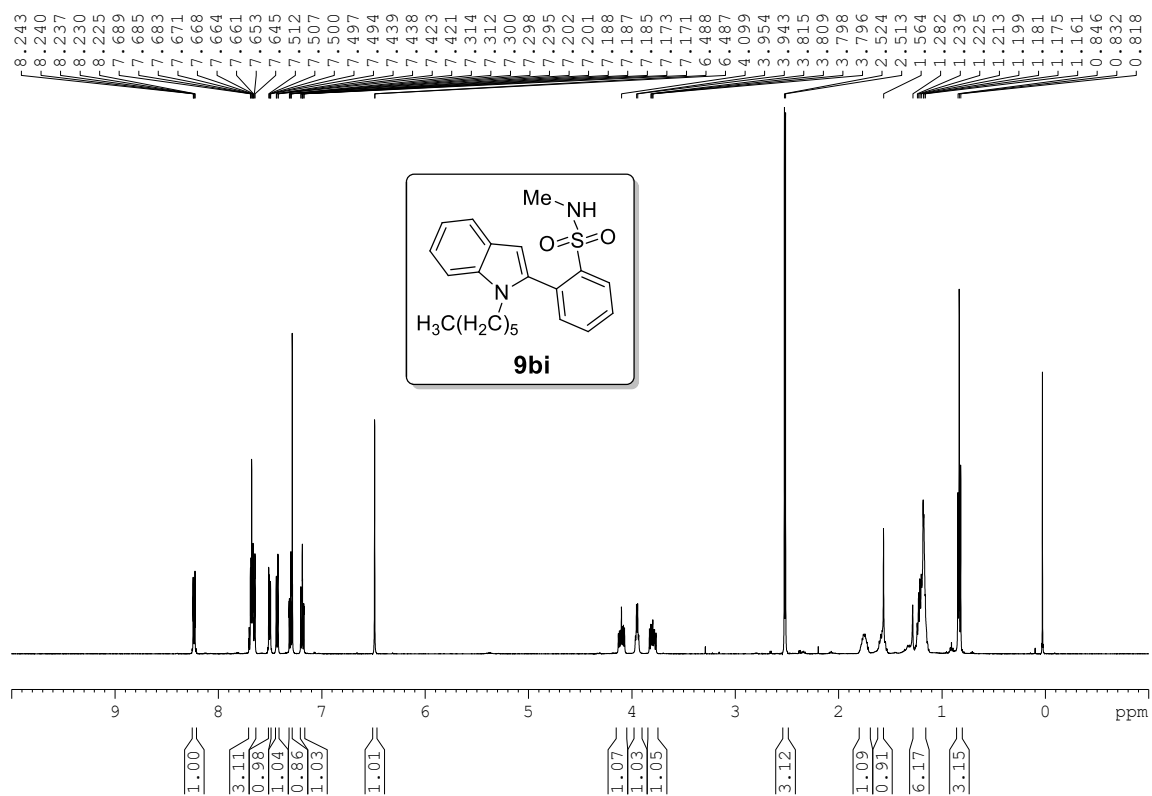

**Figure S83.** <sup>1</sup>H NMR spectrum of compound **9bi**

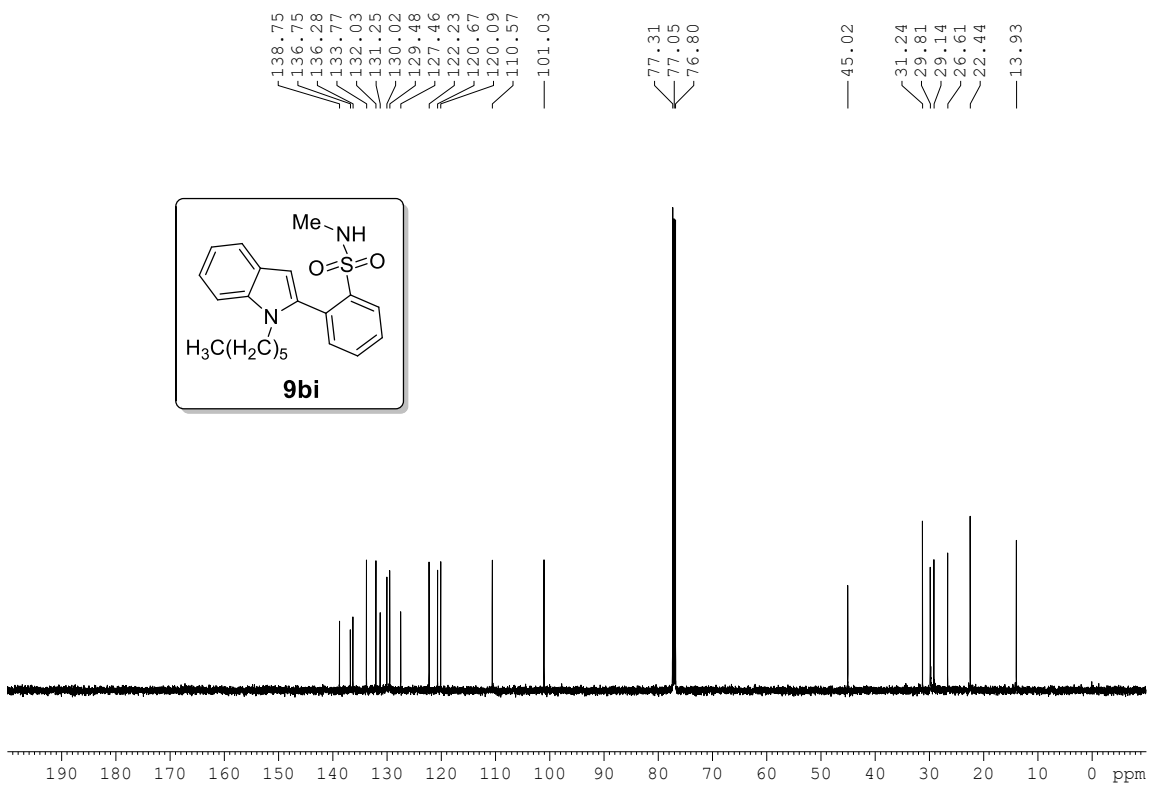

**Figure S84.** <sup>13</sup>C{<sup>1</sup>H} NMR spectrum of compound **9bi**

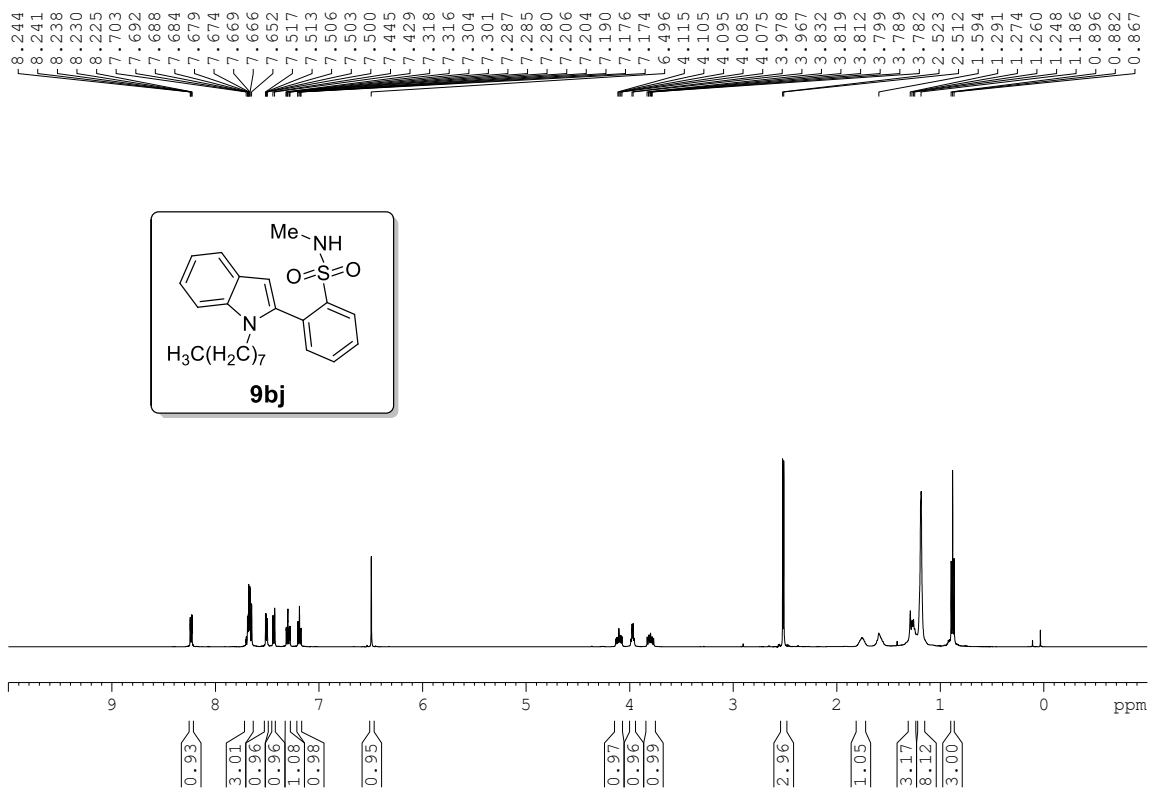

**Figure S85.** <sup>1</sup>H NMR spectrum of compound **9bj**

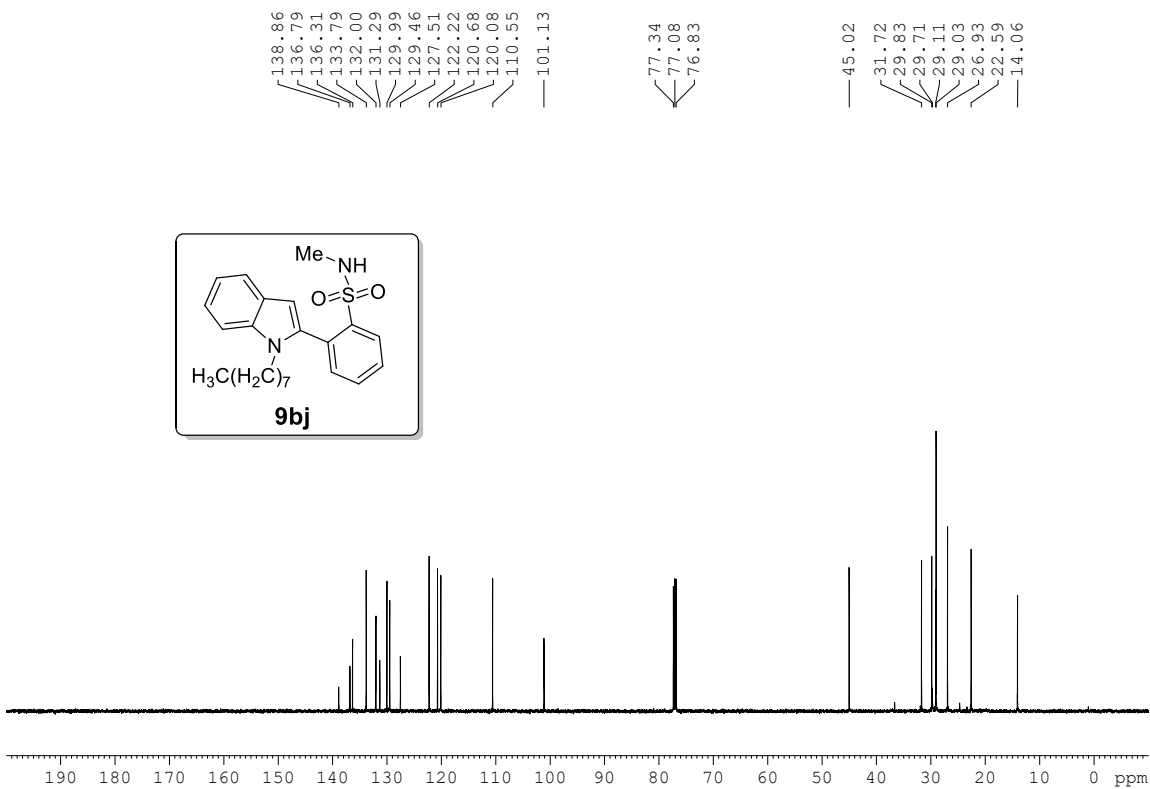

**Figure S86.** <sup>13</sup>C {<sup>1</sup>H} NMR spectrum of compound **9bj**

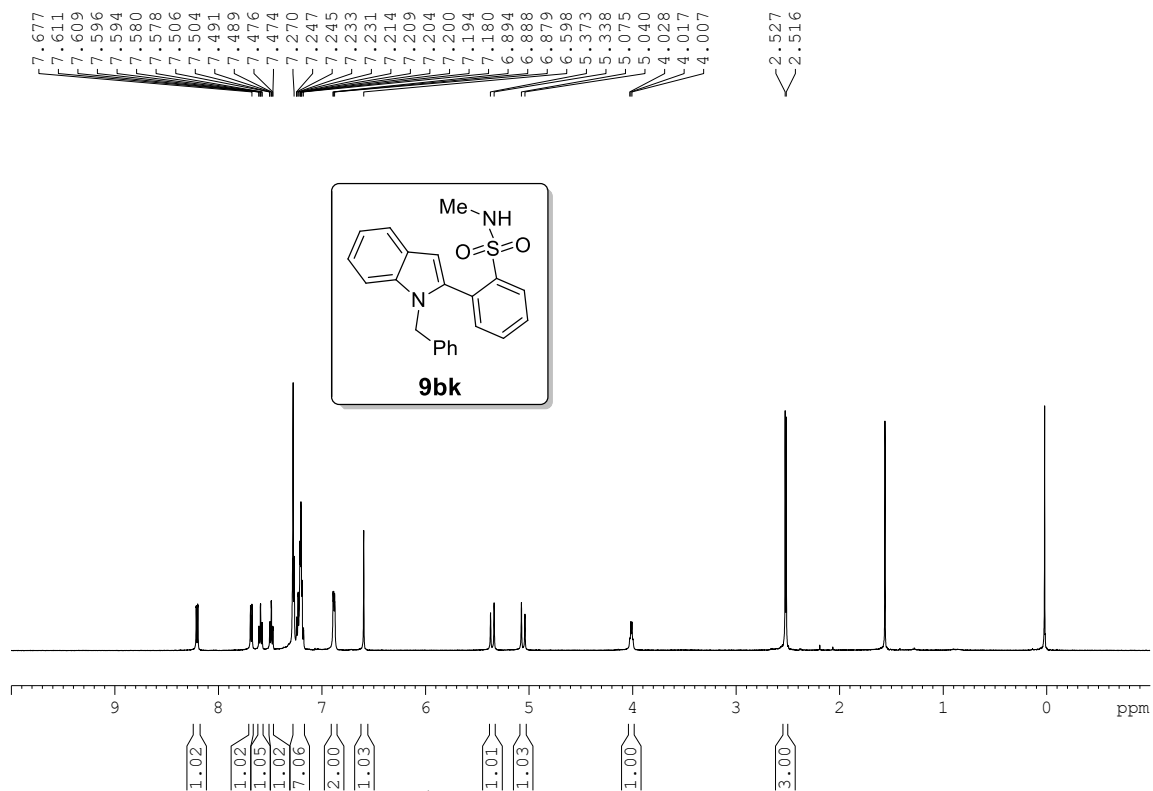

**Figure S87.**  $^1\text{H}$  NMR spectrum of compound **9bk**

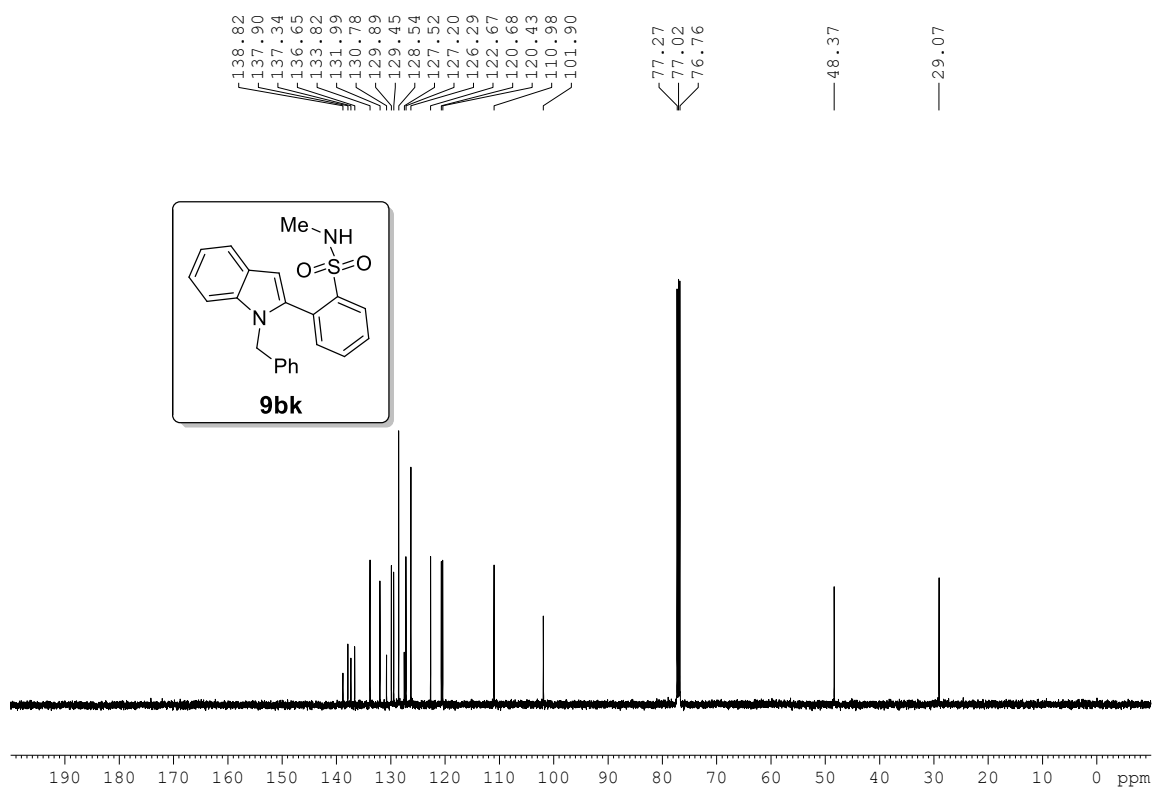

**Figure S88.**  $^{13}\text{C}\{^1\text{H}\}$  NMR spectrum of compound **9bk**

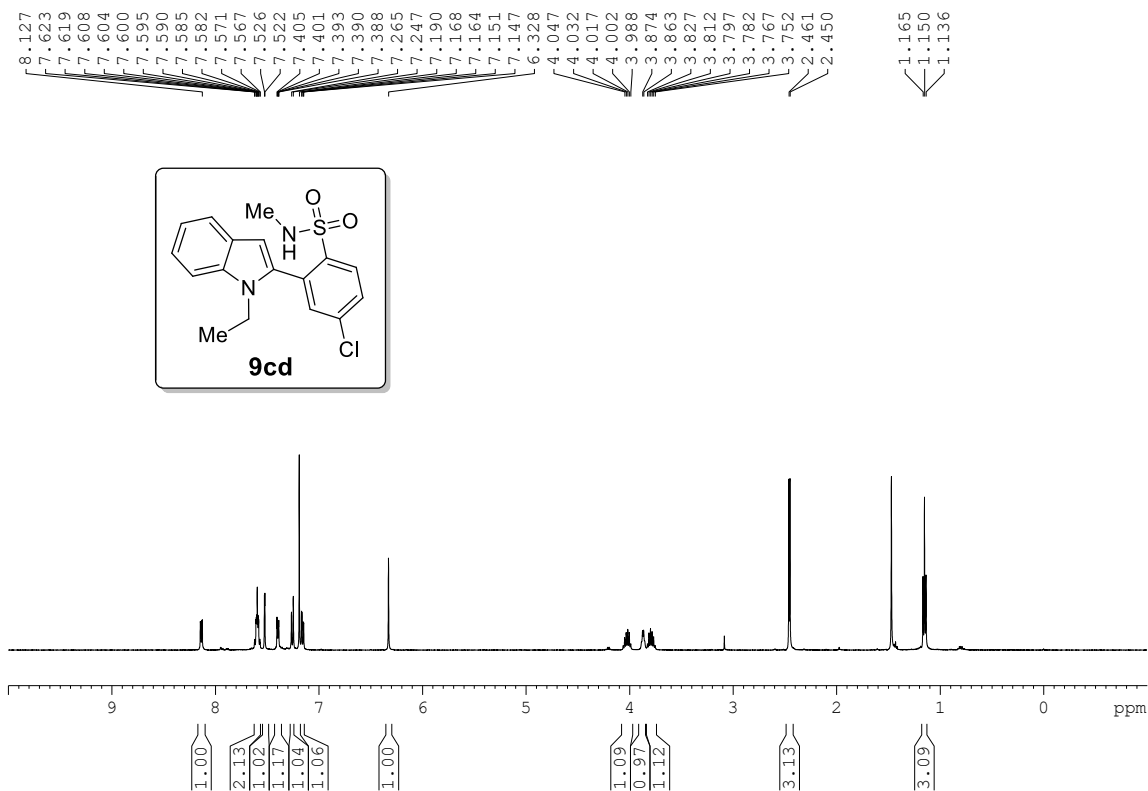

**Figure S89.**  $^1\text{H}$  NMR spectrum of compound **9cd**

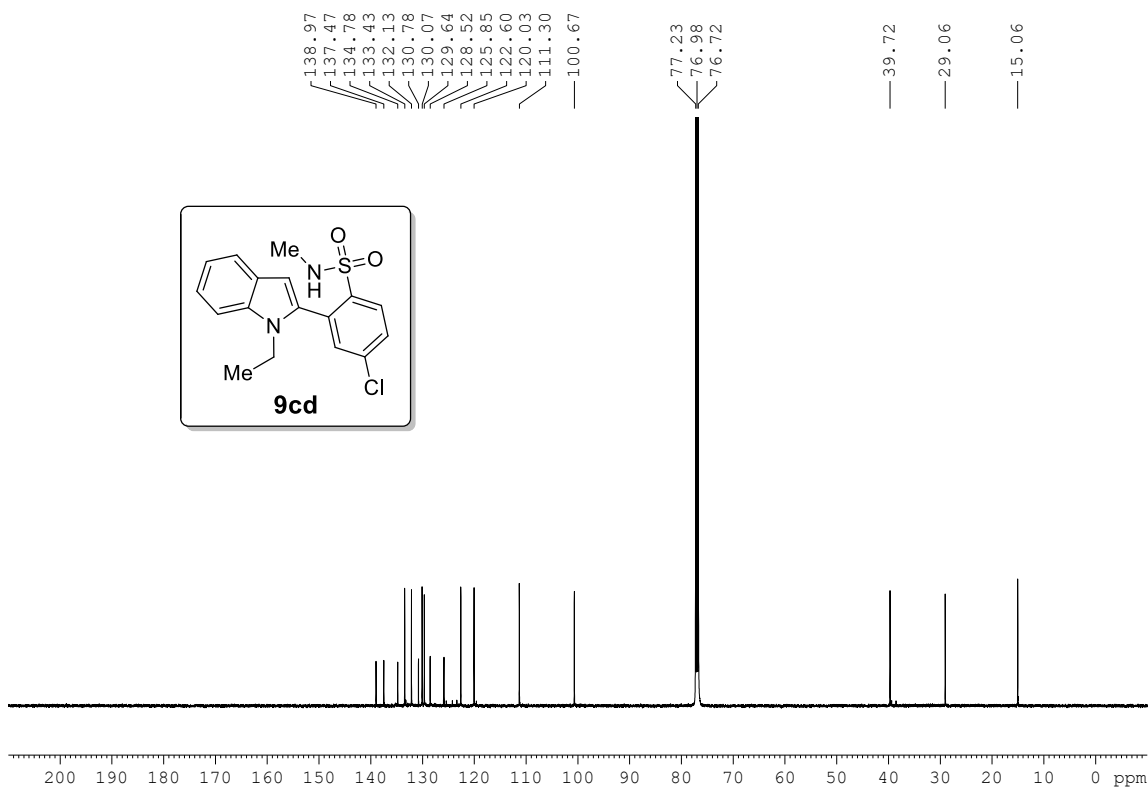

**Figure S90.**  $^{13}\text{C}\{^1\text{H}\}$  NMR spectrum of compound **9cd**

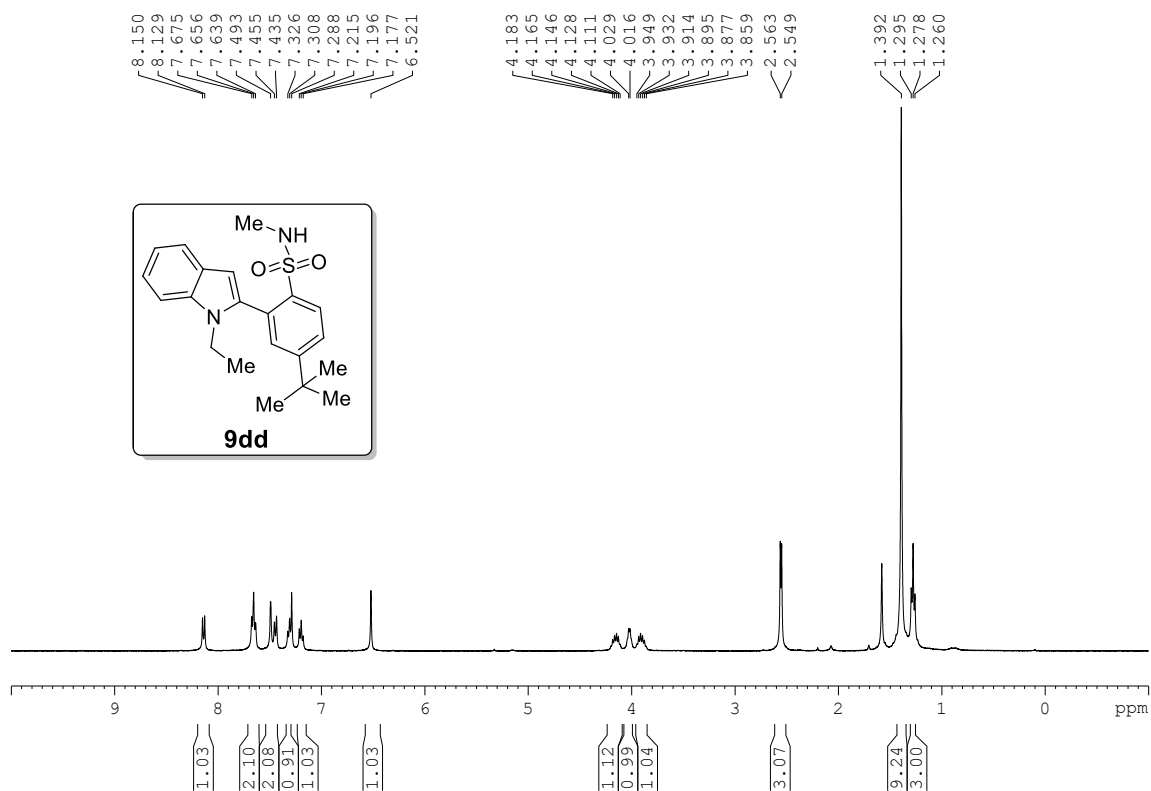

**Figure S91.**  $^1\text{H}$  NMR spectrum of compound **9dd**

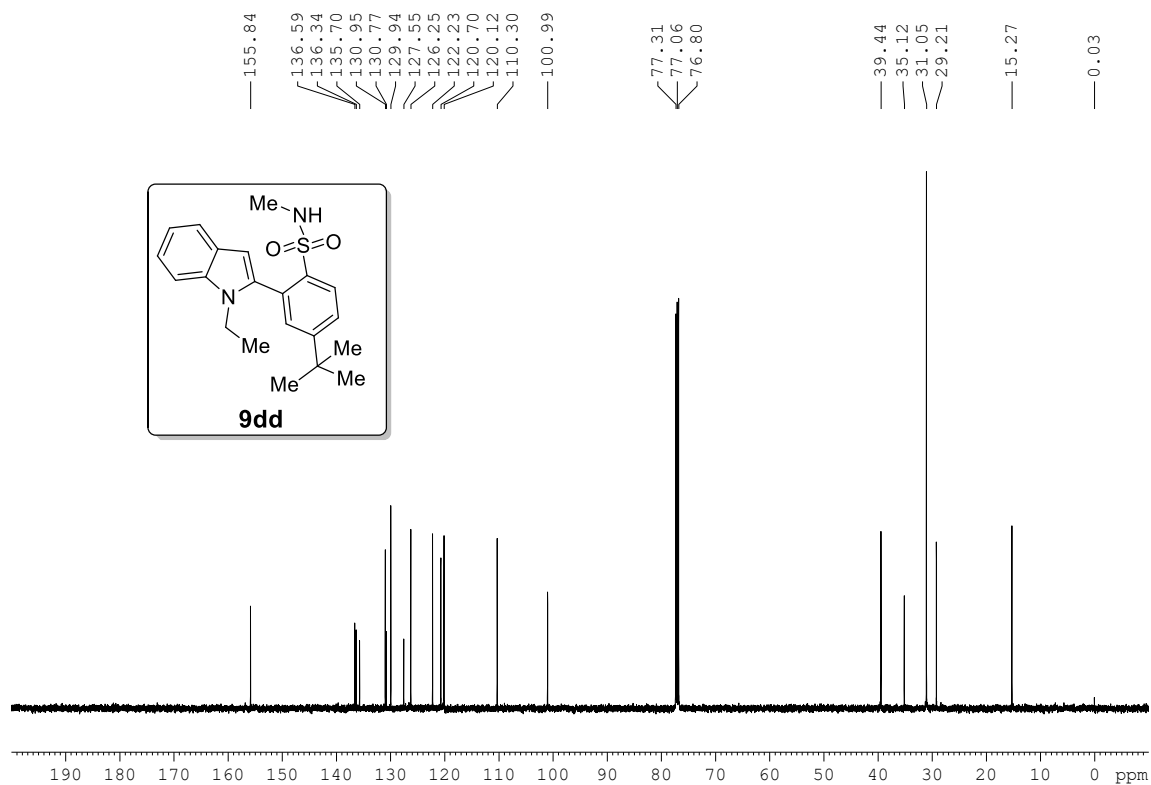

**Figure S92.**  $^{13}\text{C}\{^1\text{H}\}$  NMR spectrum of compound **9dd**

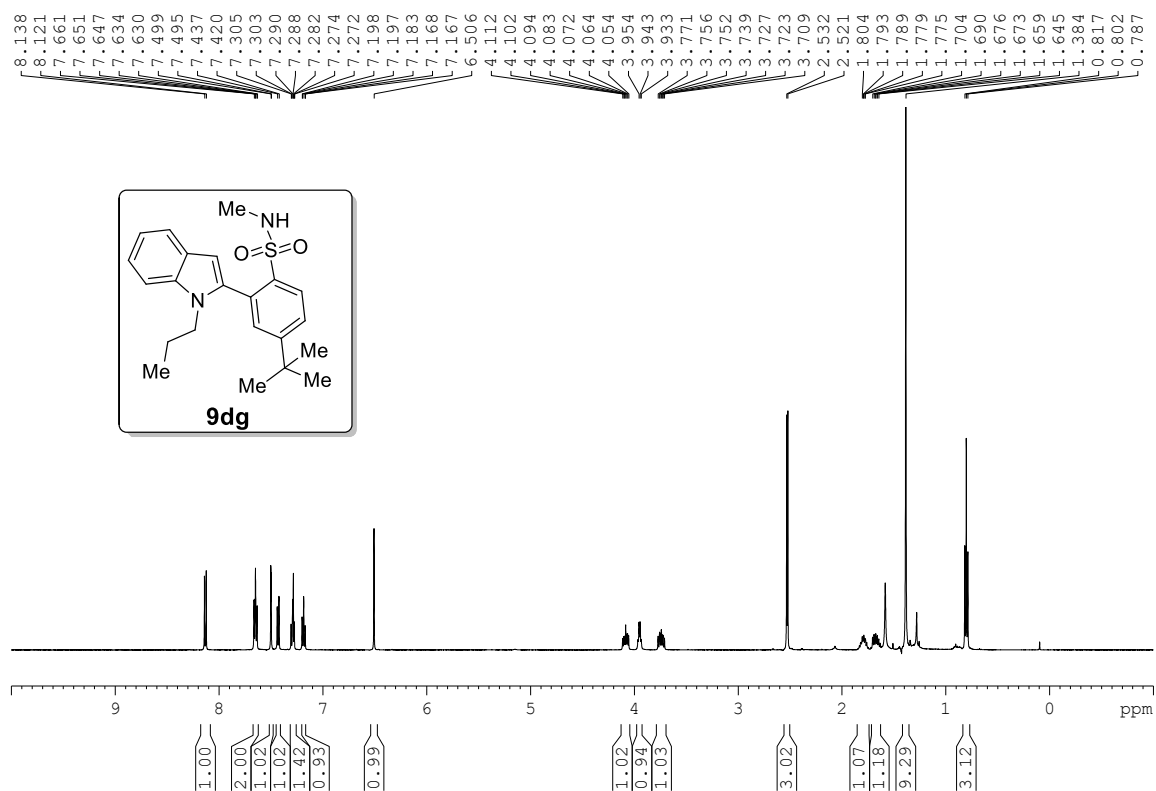

**Figure S93.**  $^1\text{H}$  NMR spectrum of compound **9dg**

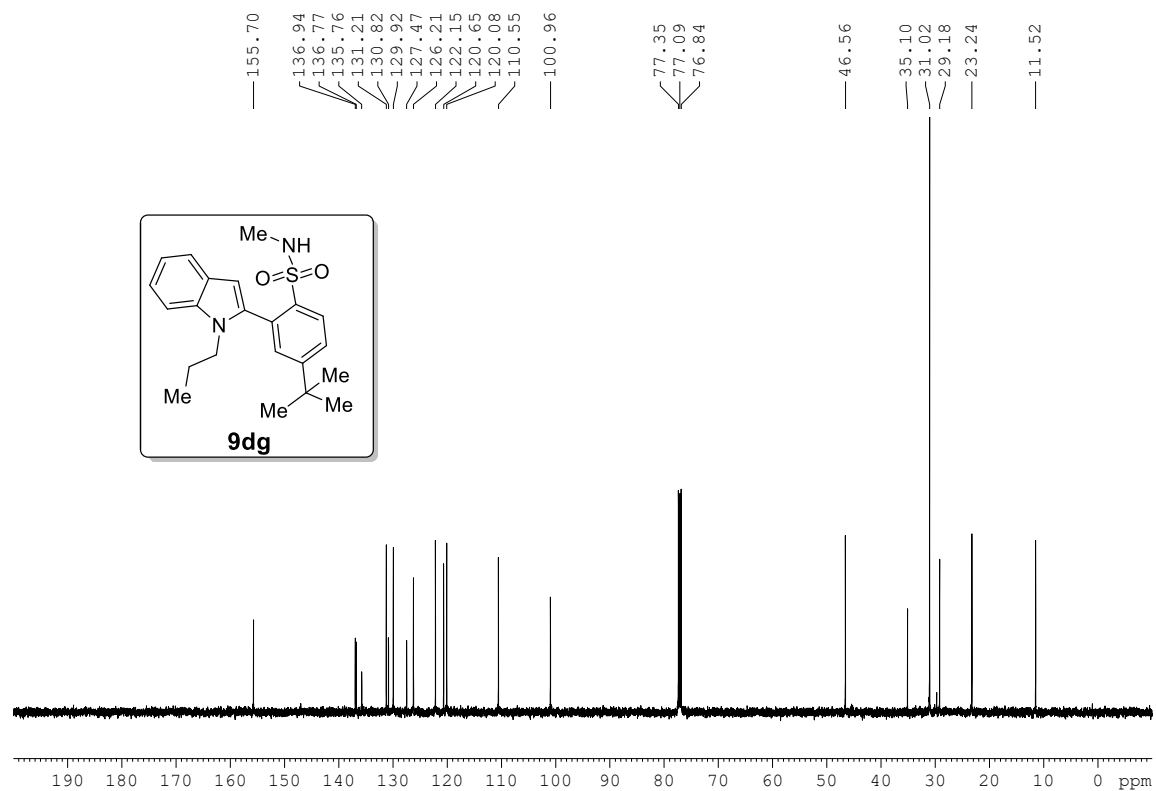

**Figure S94.**  $^{13}\text{C}\{^1\text{H}\}$  NMR spectrum of compound **9dg**

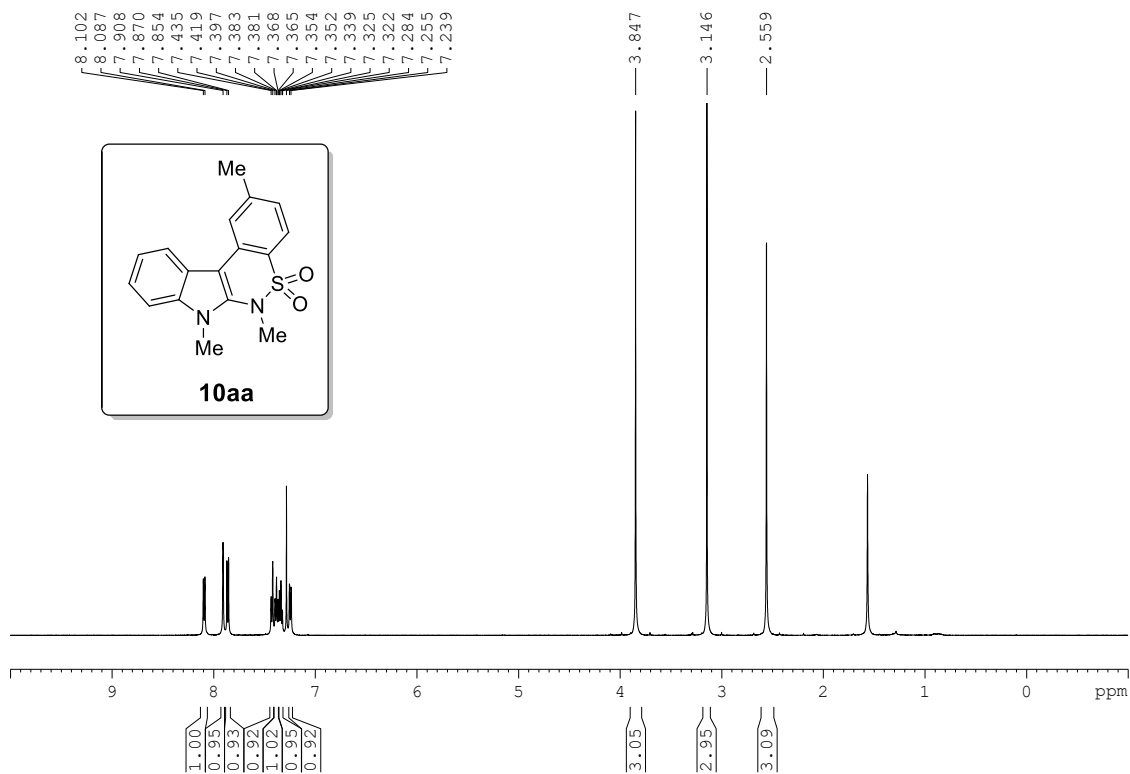

**Figure S95.**  $^1\text{H}$  NMR spectrum of compound **10aa**

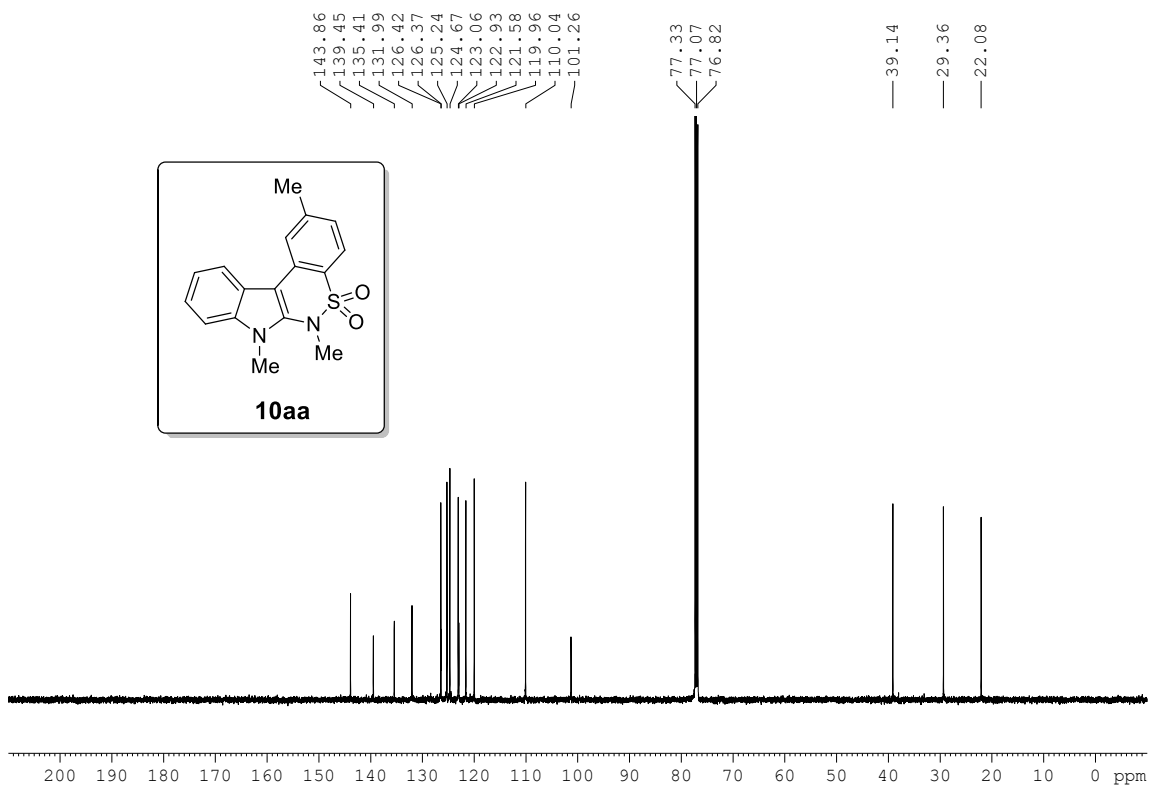

**Figure S96.**  $^{13}\text{C}\{^1\text{H}\}$  NMR spectrum of compound **10aa**



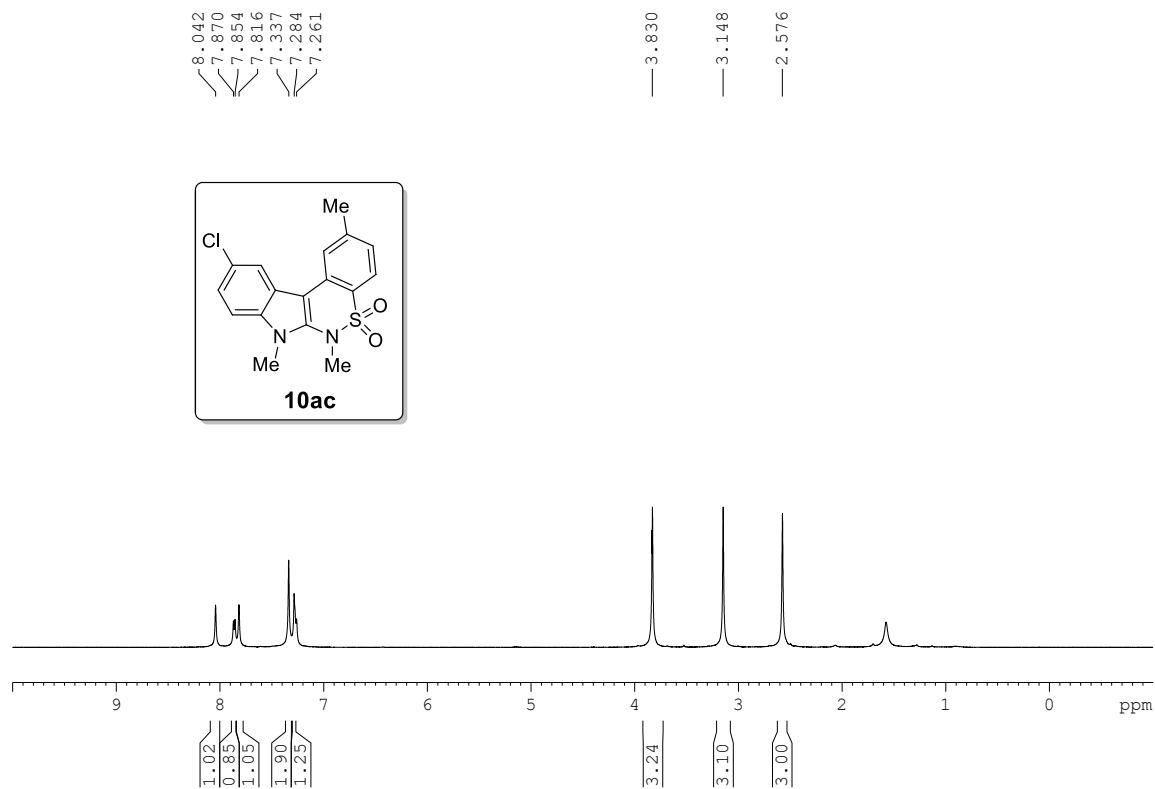

**Figure S97.**  $^1\text{H}$  NMR spectrum of compound **10ac**

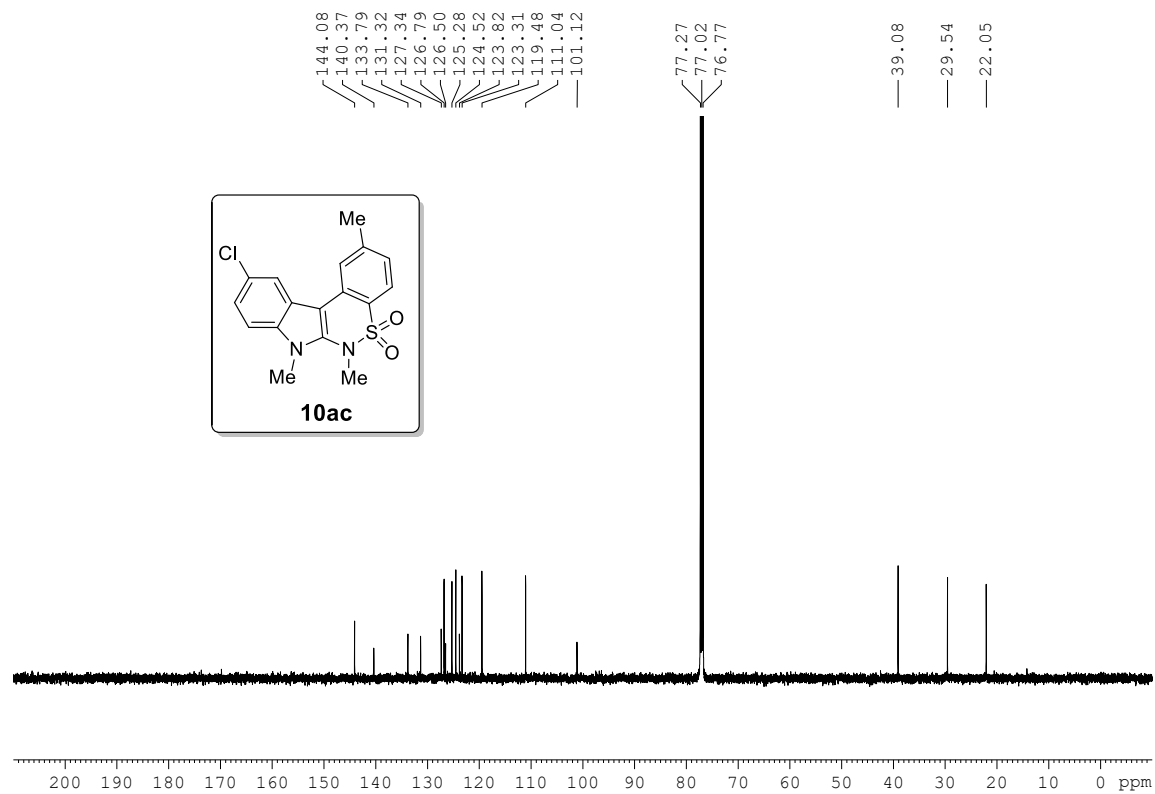

**Figure S98.**  $^{13}\text{C}$   $\{^1\text{H}\}$  NMR spectrum of compound **10ac**

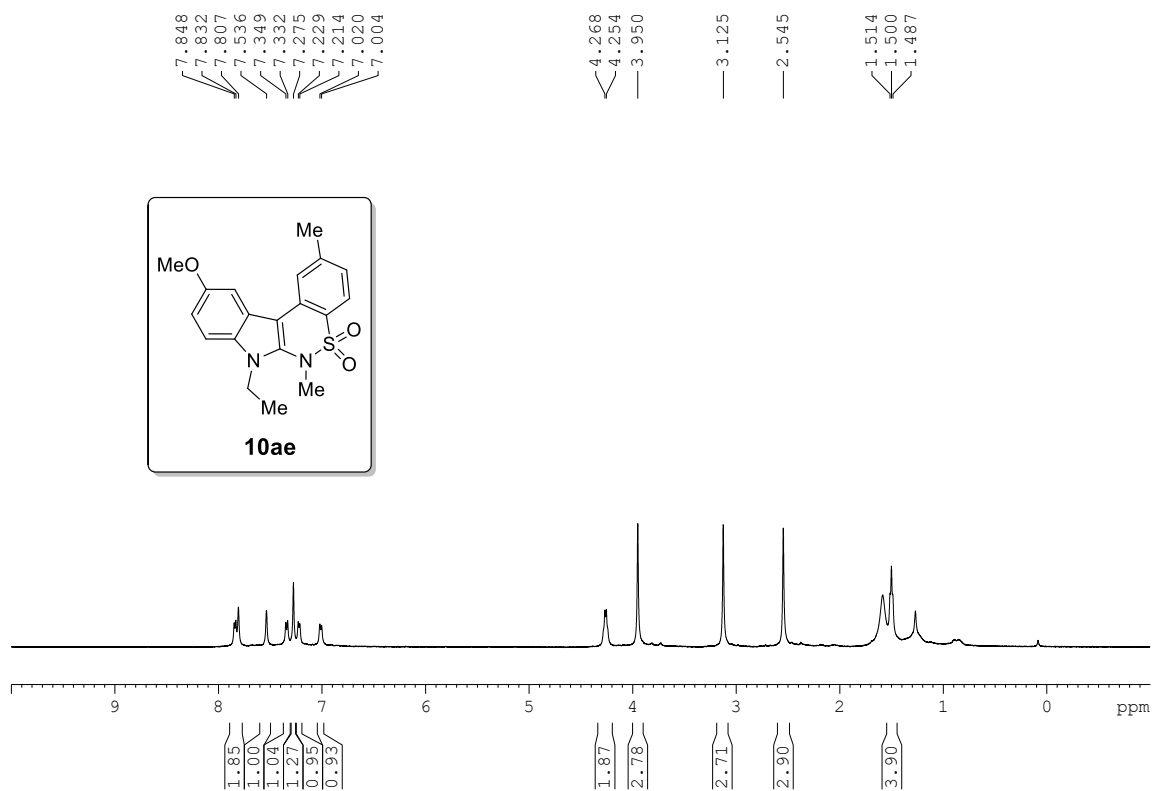

Figure S99.  $^1\text{H}$  NMR spectrum of compound **10ae**

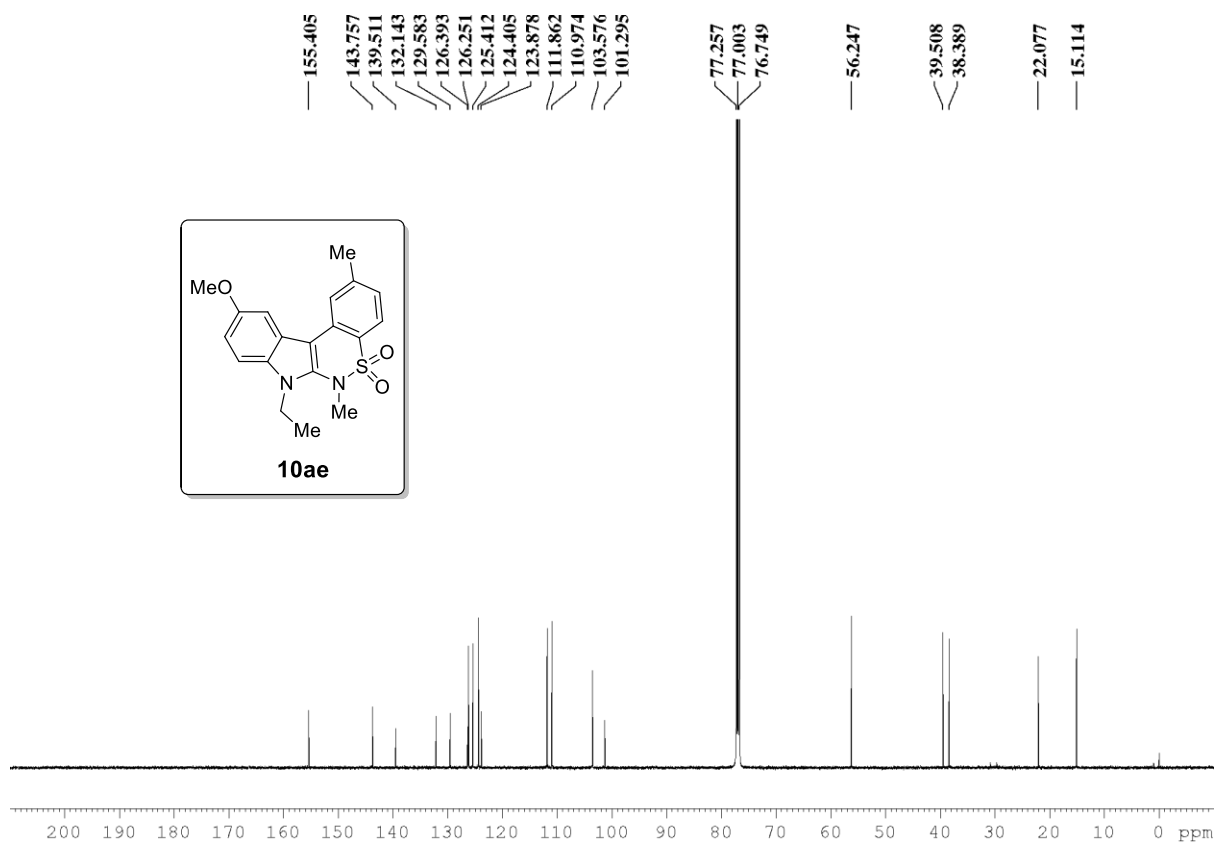

Figure S100.  $^{13}\text{C}$   $\{^1\text{H}\}$  NMR spectrum of compound **10ae**

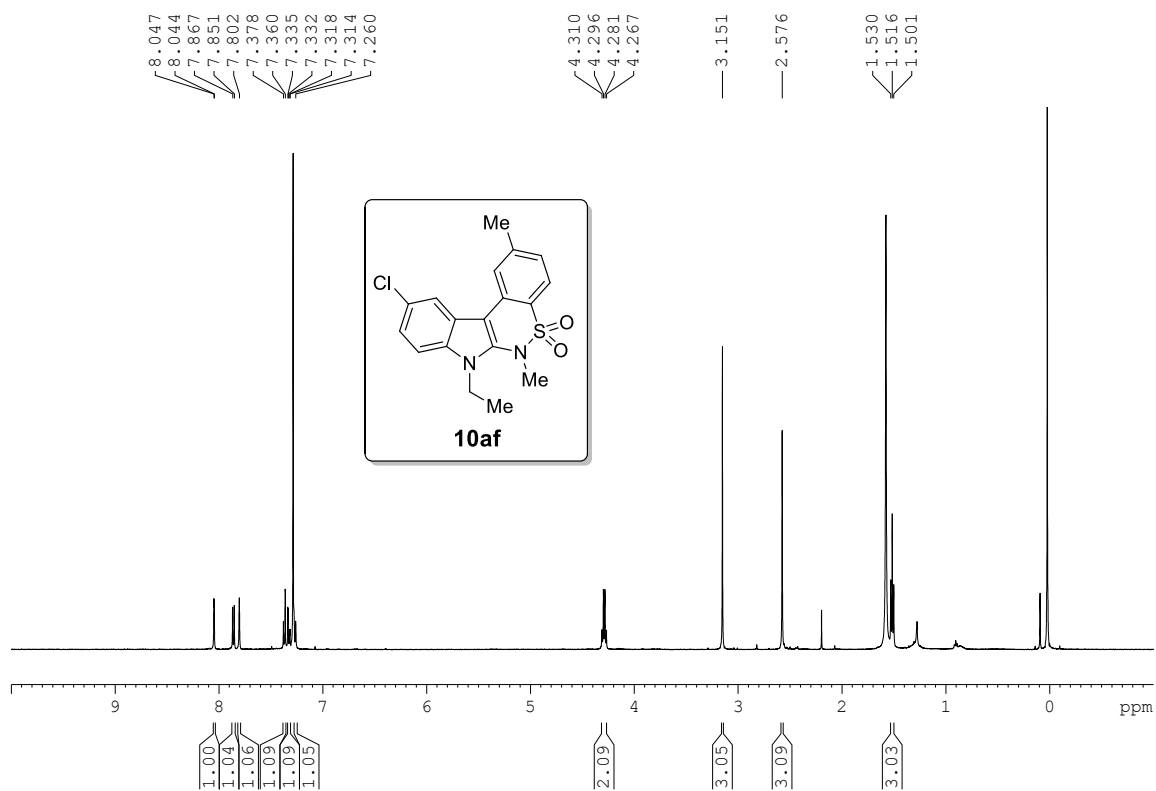

**Figure S101.** <sup>1</sup>H NMR spectrum of compound **10af**

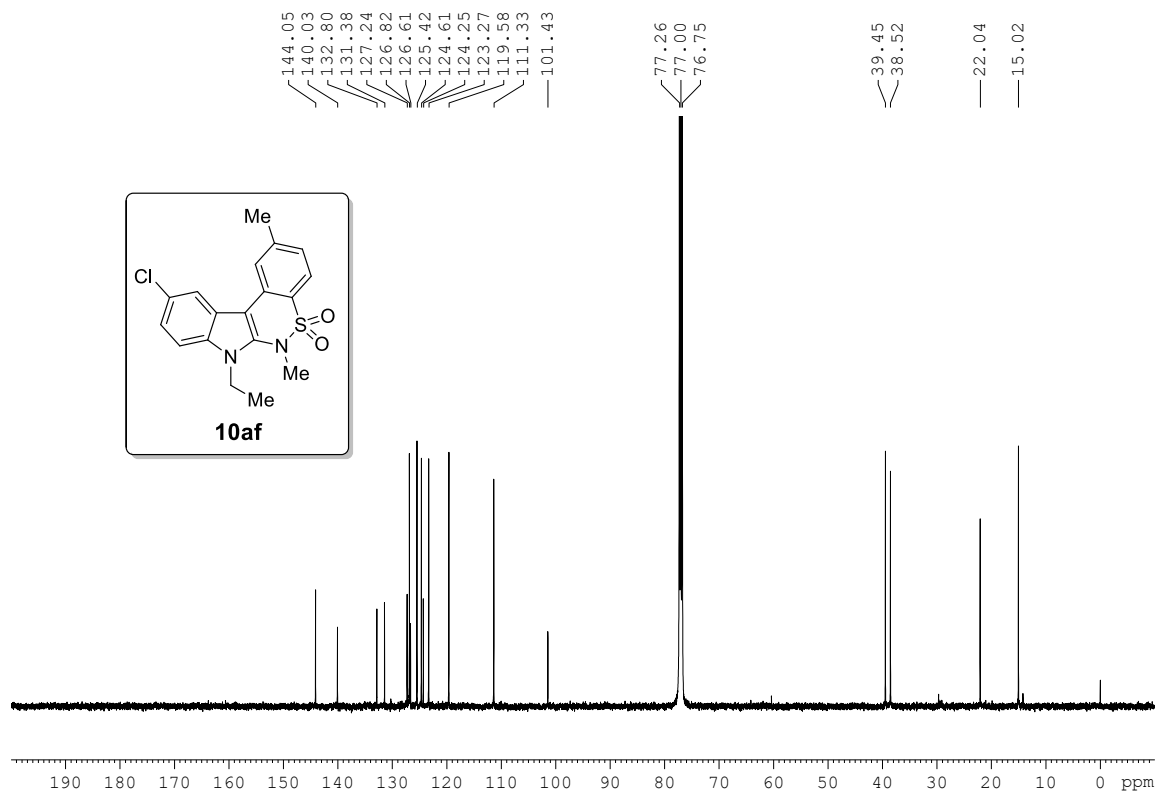

**Figure S102.** <sup>13</sup>C {<sup>1</sup>H} NMR spectrum of compound **10af**

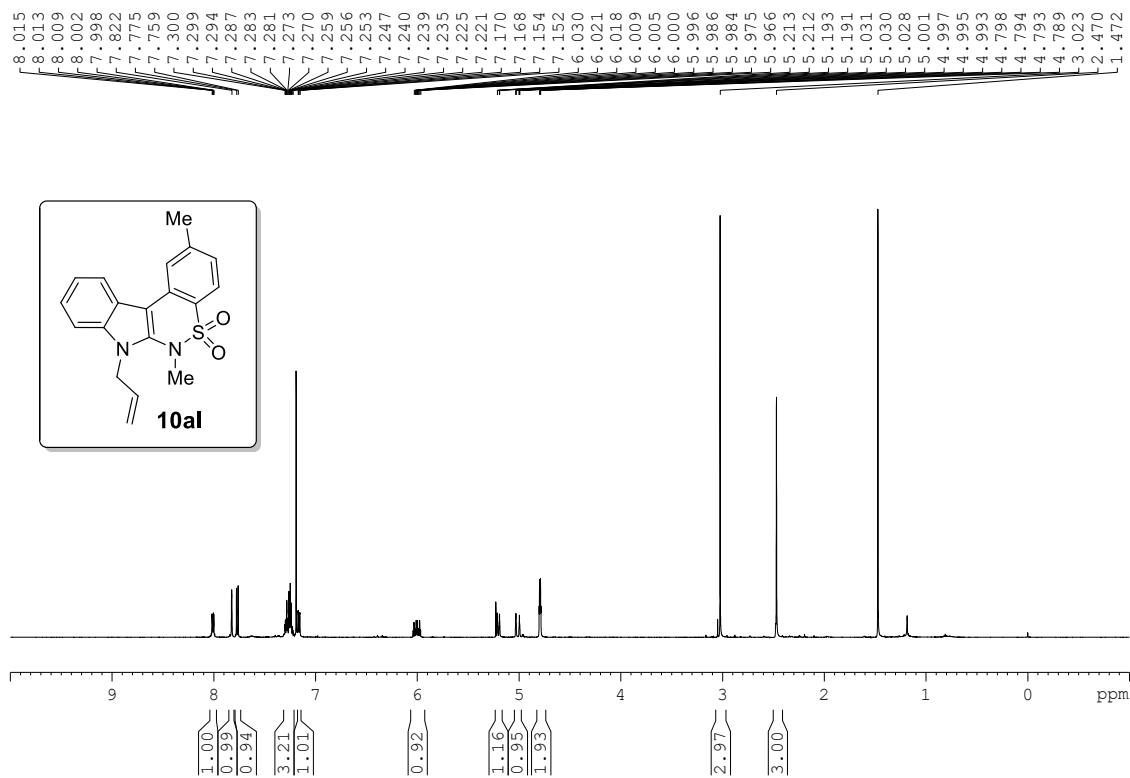

**Figure S103.**  $^1\text{H}$  NMR spectrum of compound **10al**

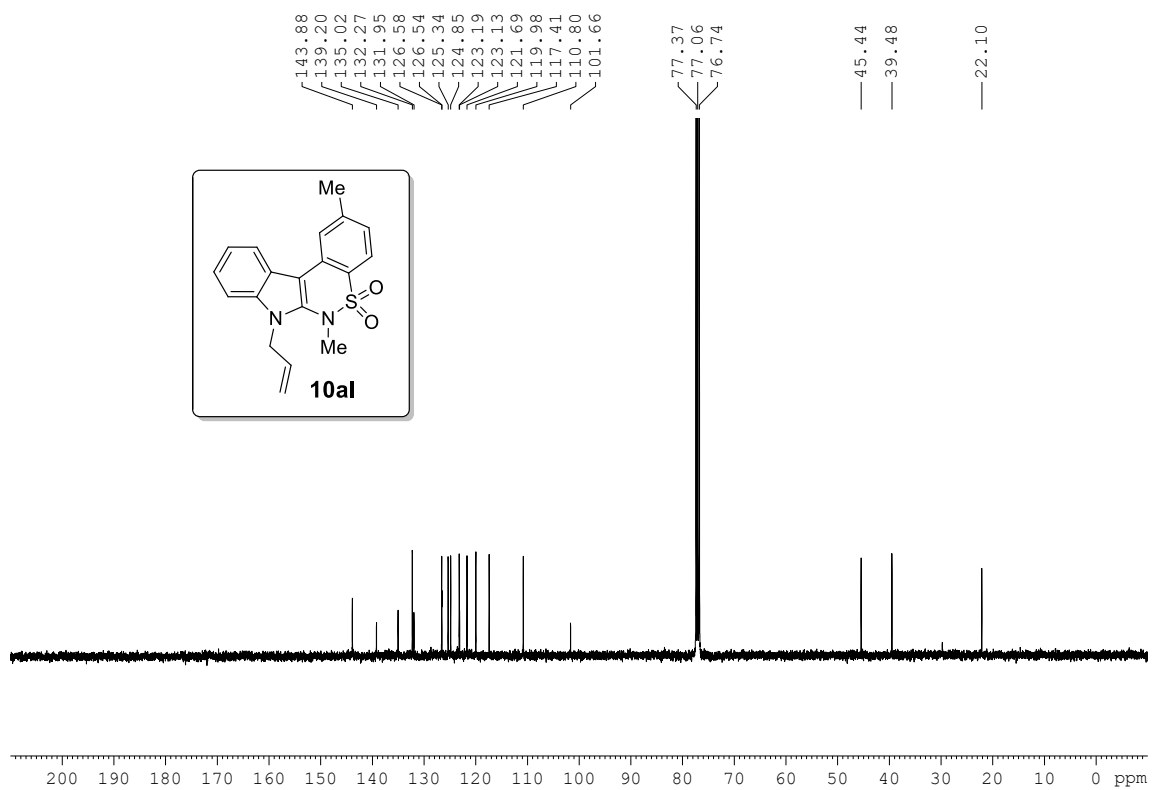

**Figure S104.**  $^{13}\text{C}\{^1\text{H}\}$  NMR spectrum of compound **10al**

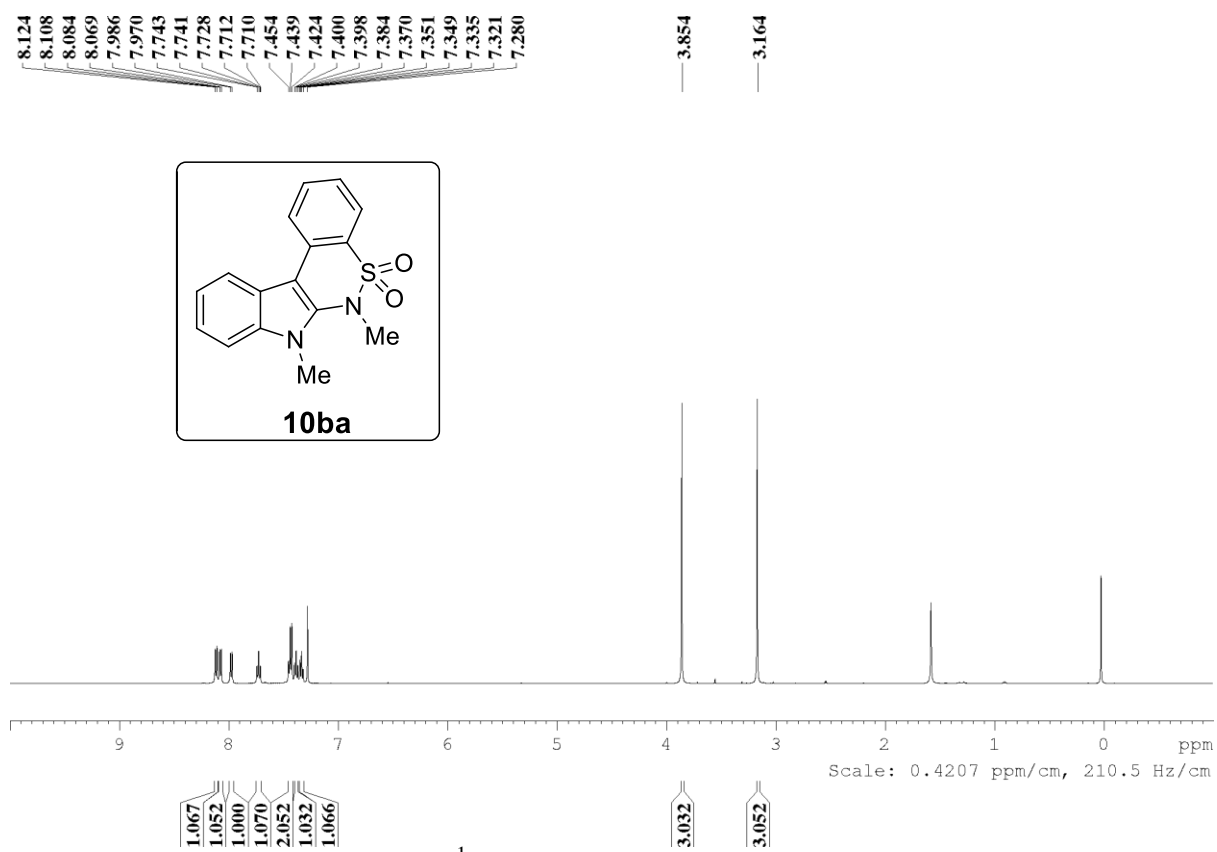

**Figure S105.**  $^1\text{H}$  NMR spectrum of compound **10ba**

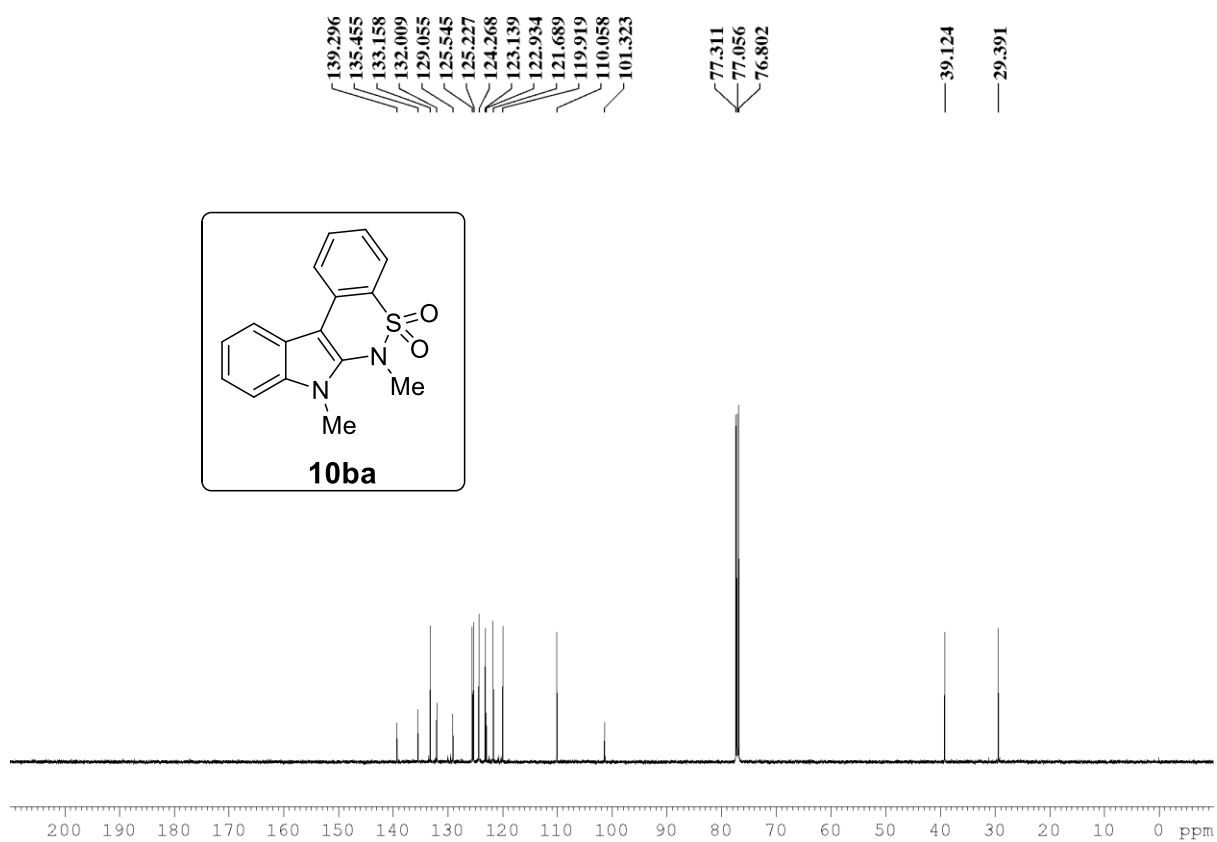

**Figure S106.**  $^{13}\text{C}$  { $^1\text{H}}$  NMR spectrum of compound **10ba**

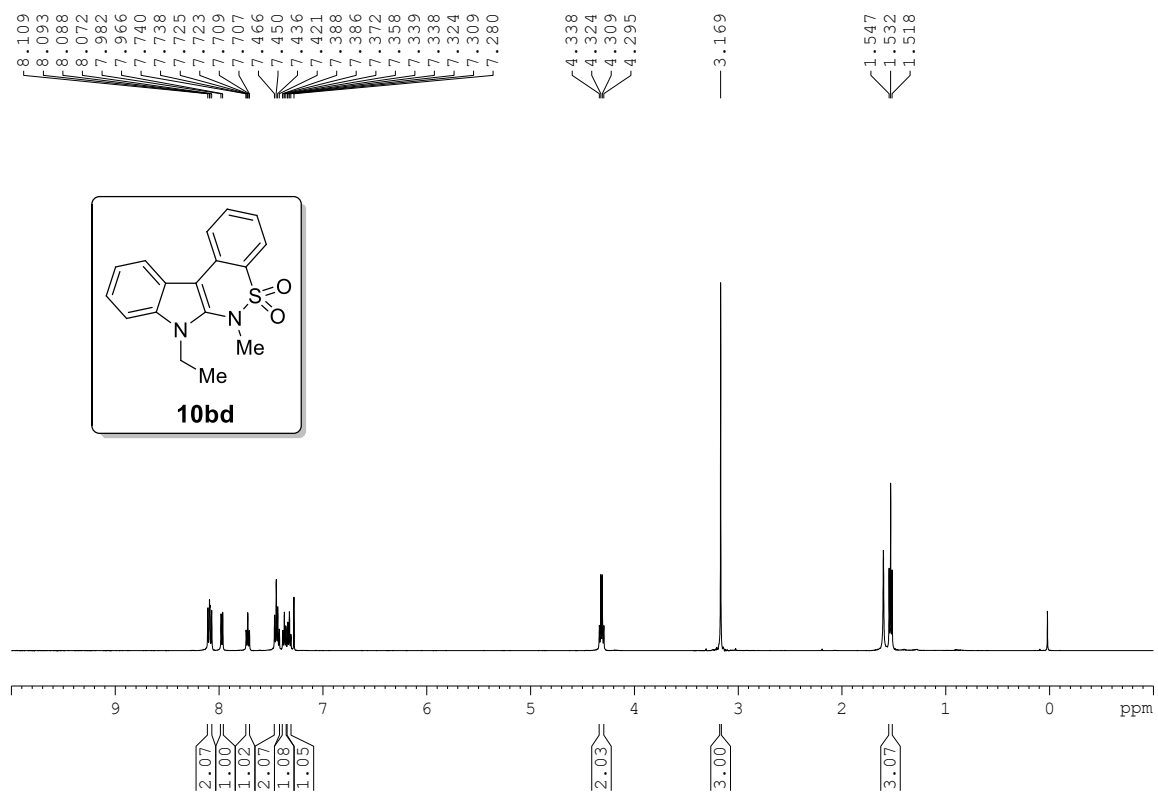

**Figure S107.**  $^1\text{H}$  NMR spectrum of compound **10bd**

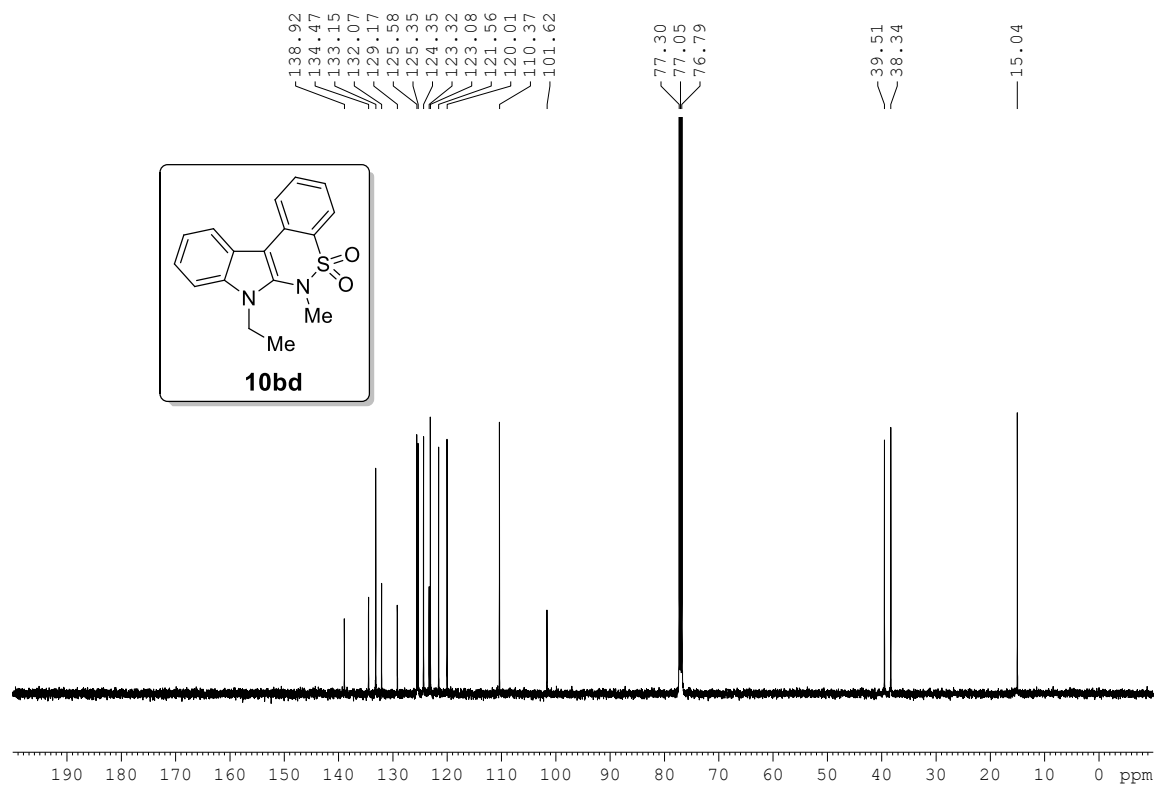

**Figure S108.**  $^{13}\text{C}$   $\{^1\text{H}\}$  NMR spectrum of compound **10bd**

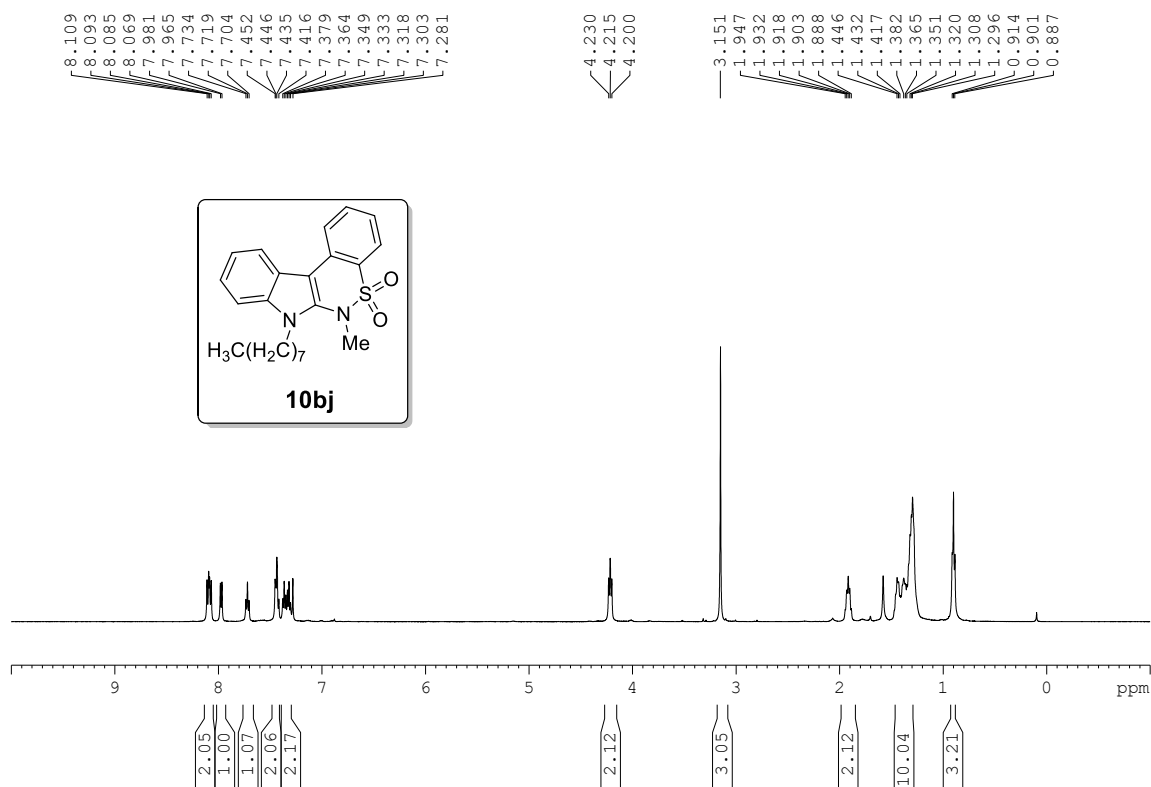

**Figure S109.**  $^1\text{H}$  NMR spectrum of compound **10bj**

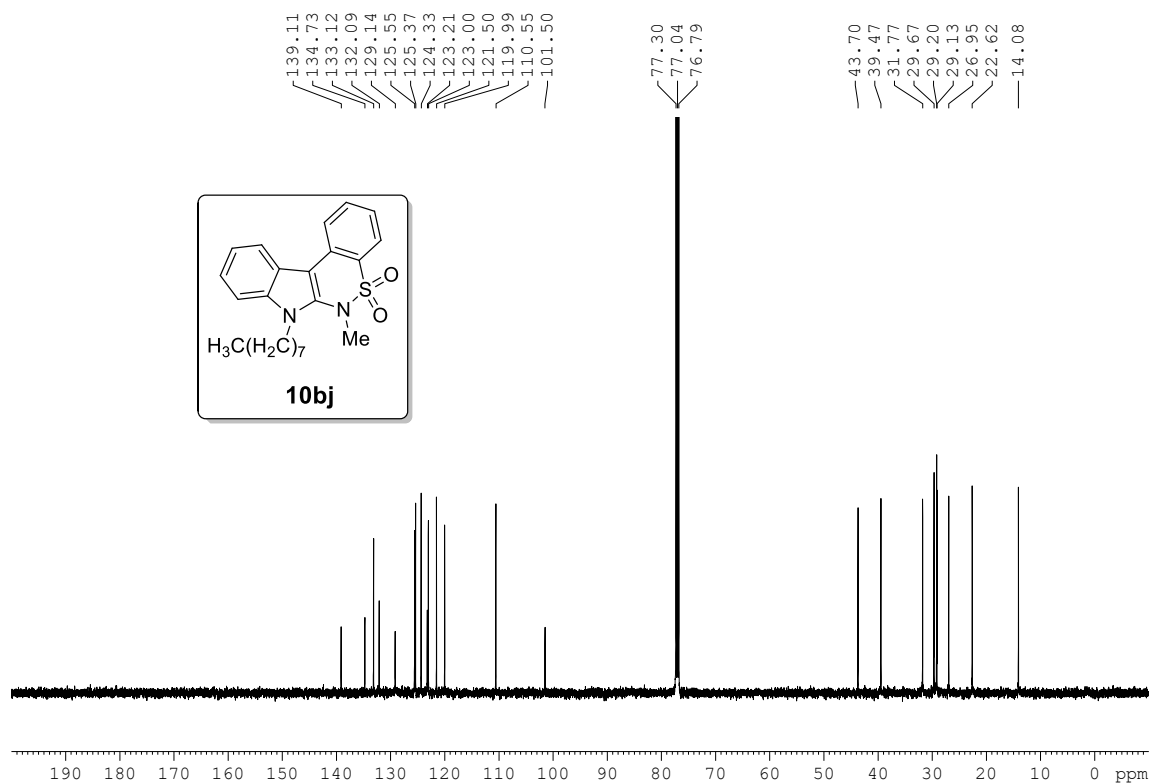

**Figure S110.**  $^{13}\text{C}\{^1\text{H}\}$  NMR spectrum of compound **10bj**

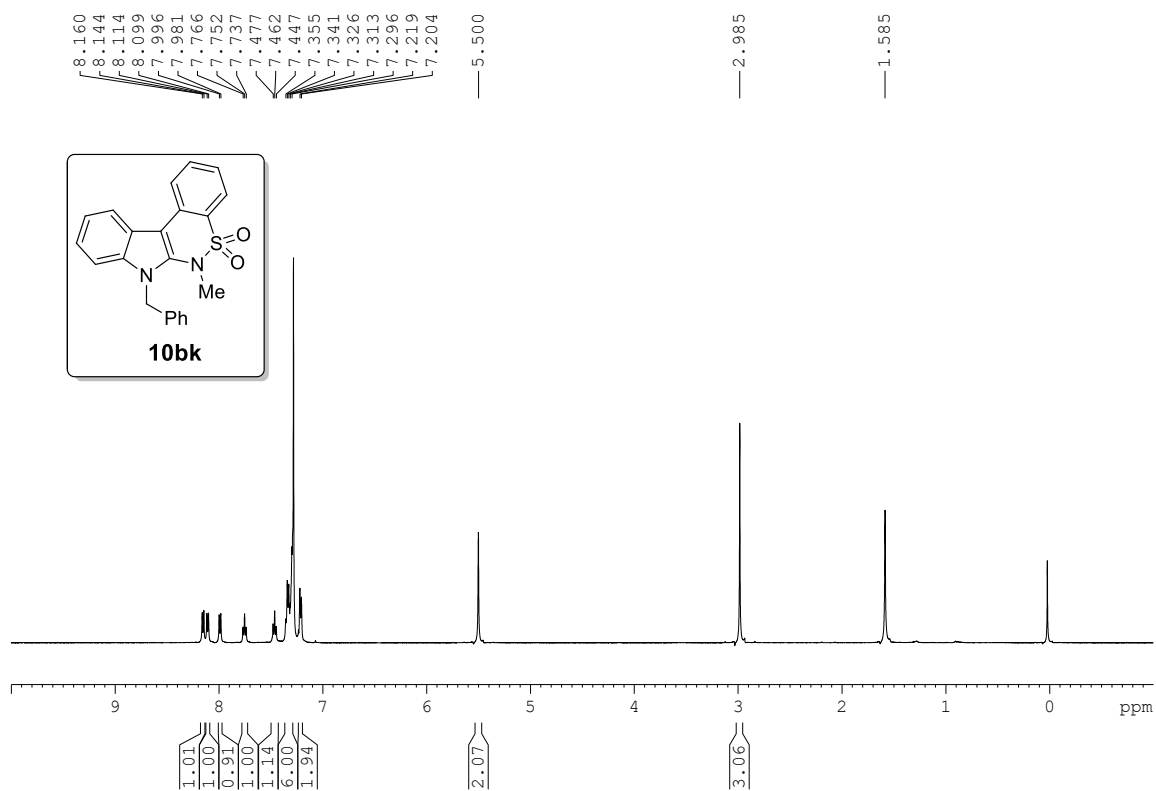

**Figure S111.**  $^1\text{H}$  NMR spectrum of compound **10bk**

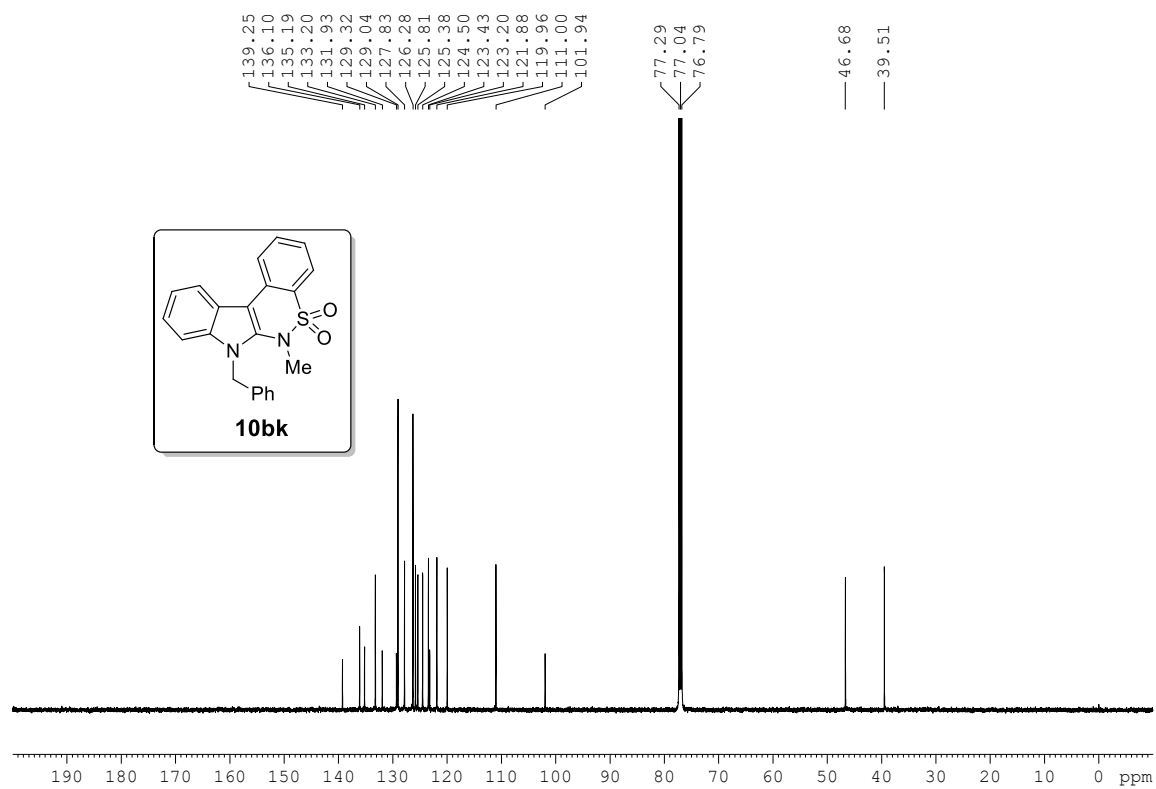

**Figure S112.**  $^{13}\text{C}$  { $^1\text{H}}$  NMR spectrum of compound **10bk**



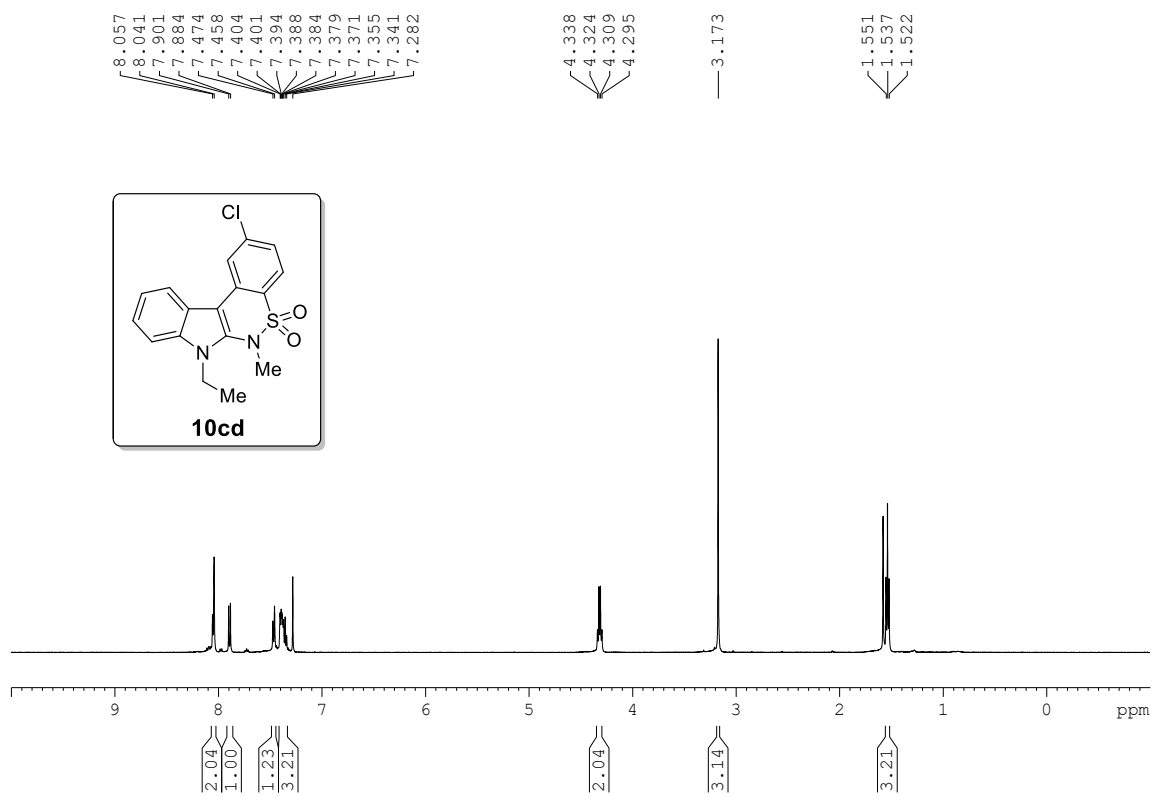

Figure S113.  $^1\text{H}$  NMR spectrum of compound **10cd**

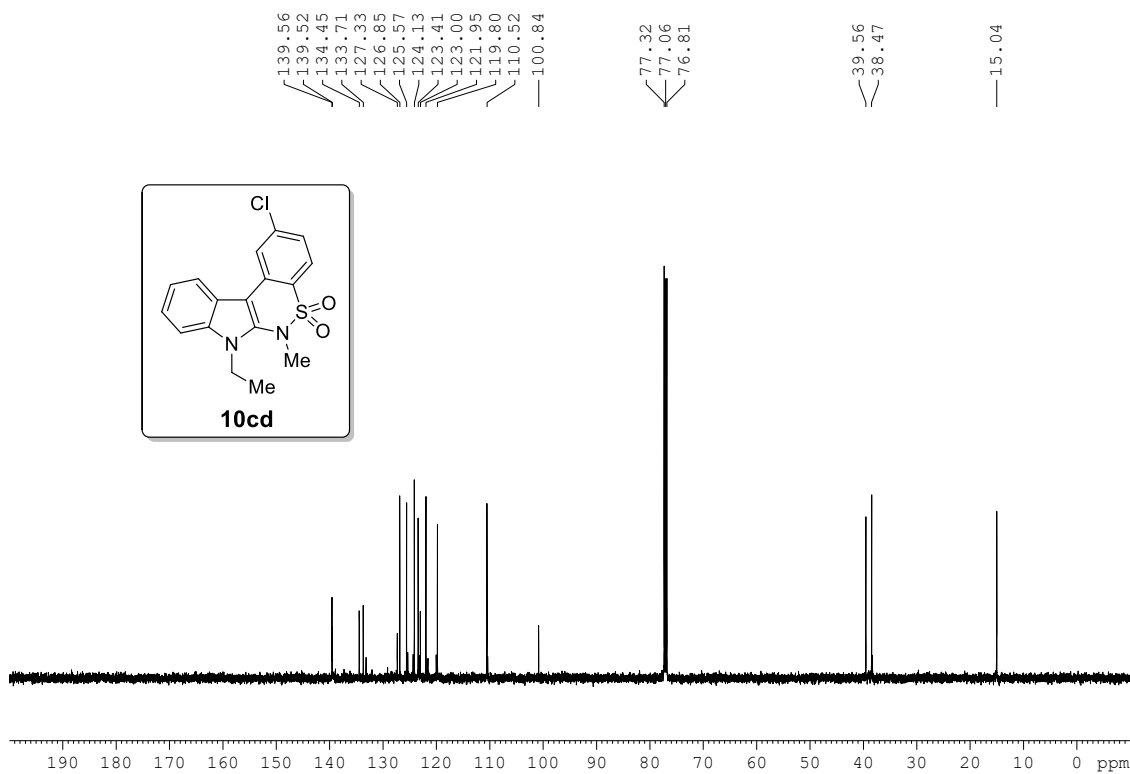

Figure S114.  $^{13}\text{C}\{^1\text{H}\}$  NMR spectrum of compound **10cd**

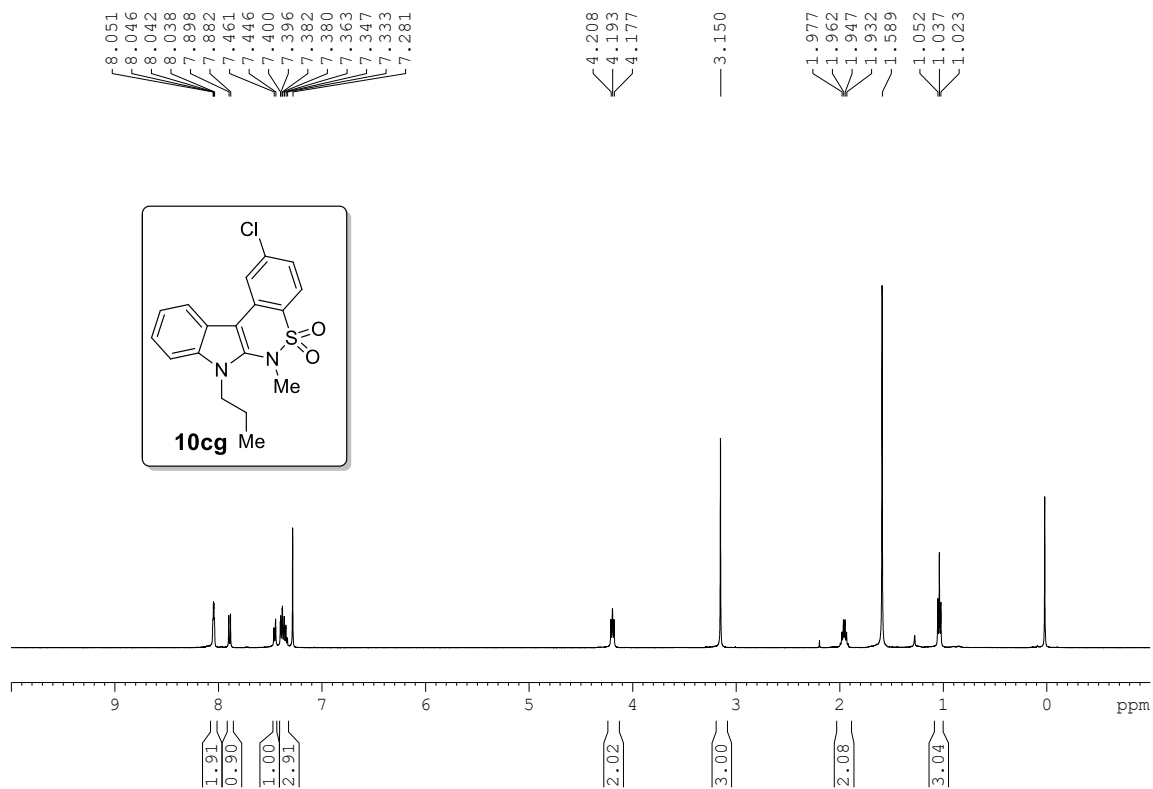

**Figure S115.** <sup>1</sup>H NMR spectrum of compound **10cg**

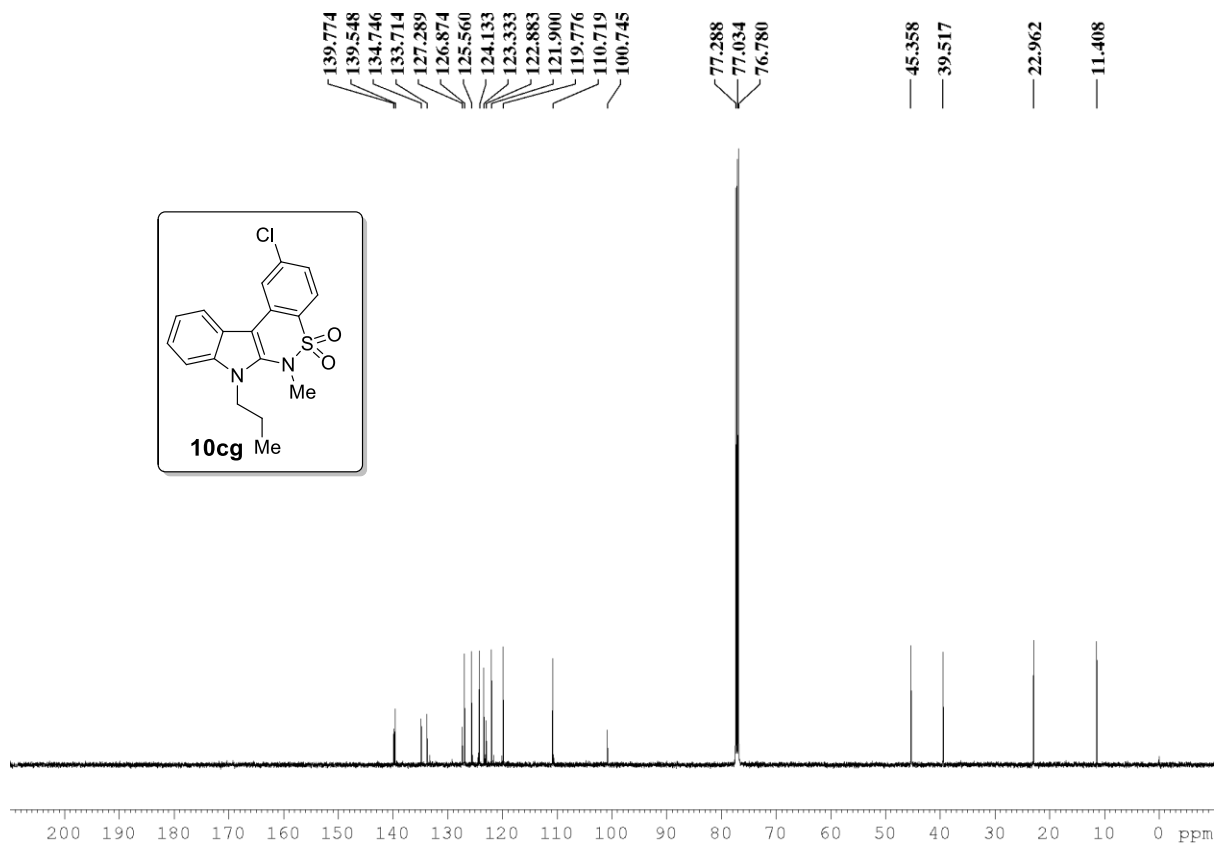

**Figure S116.** <sup>13</sup>C {<sup>1</sup>H} NMR spectrum of compound **10cg**

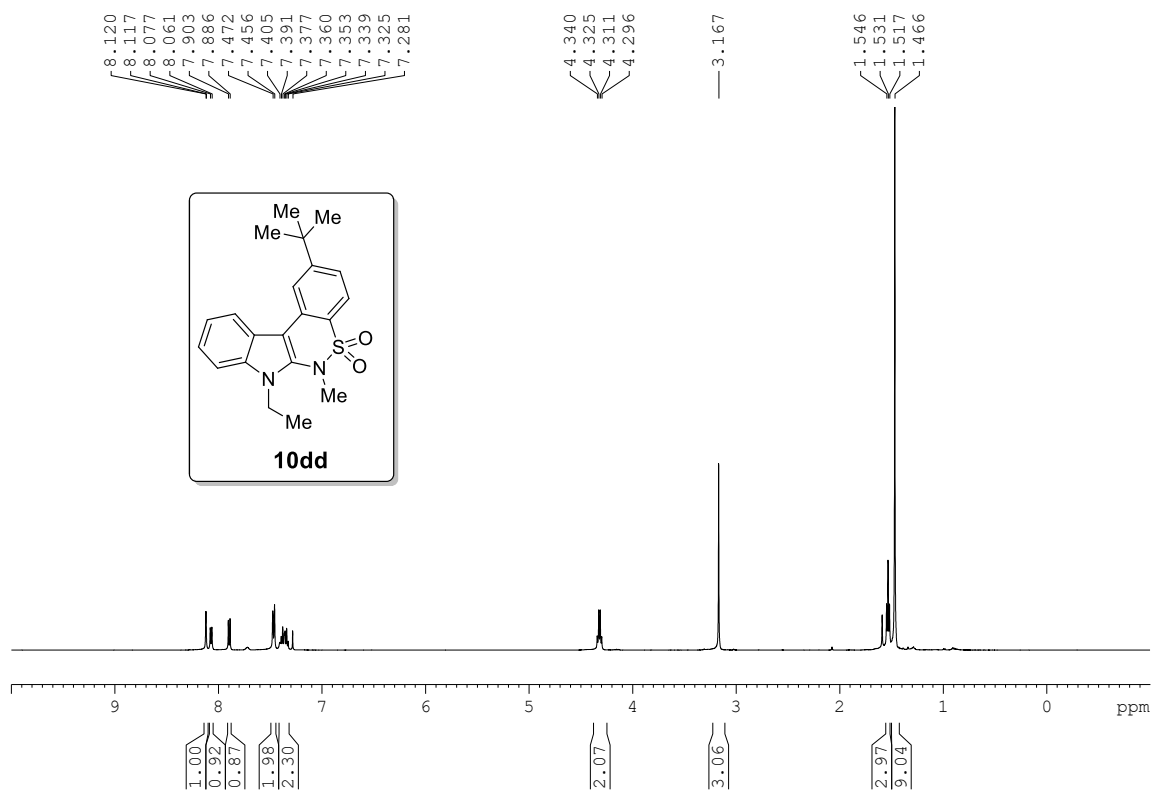

**Figure S117.** <sup>1</sup>H NMR spectrum of compound **10dd**

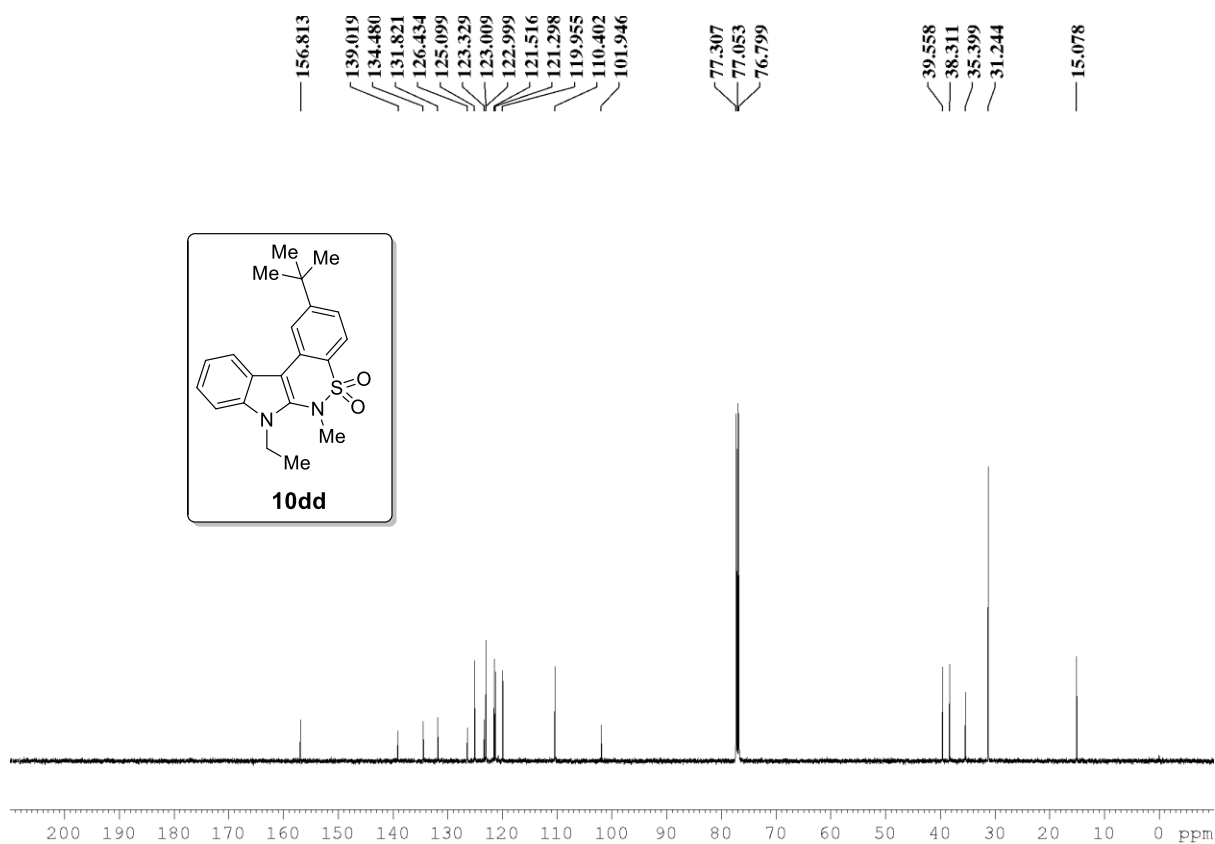

**Figure S118.** <sup>13</sup>C {<sup>1</sup>H} NMR spectrum of compound **10dd**

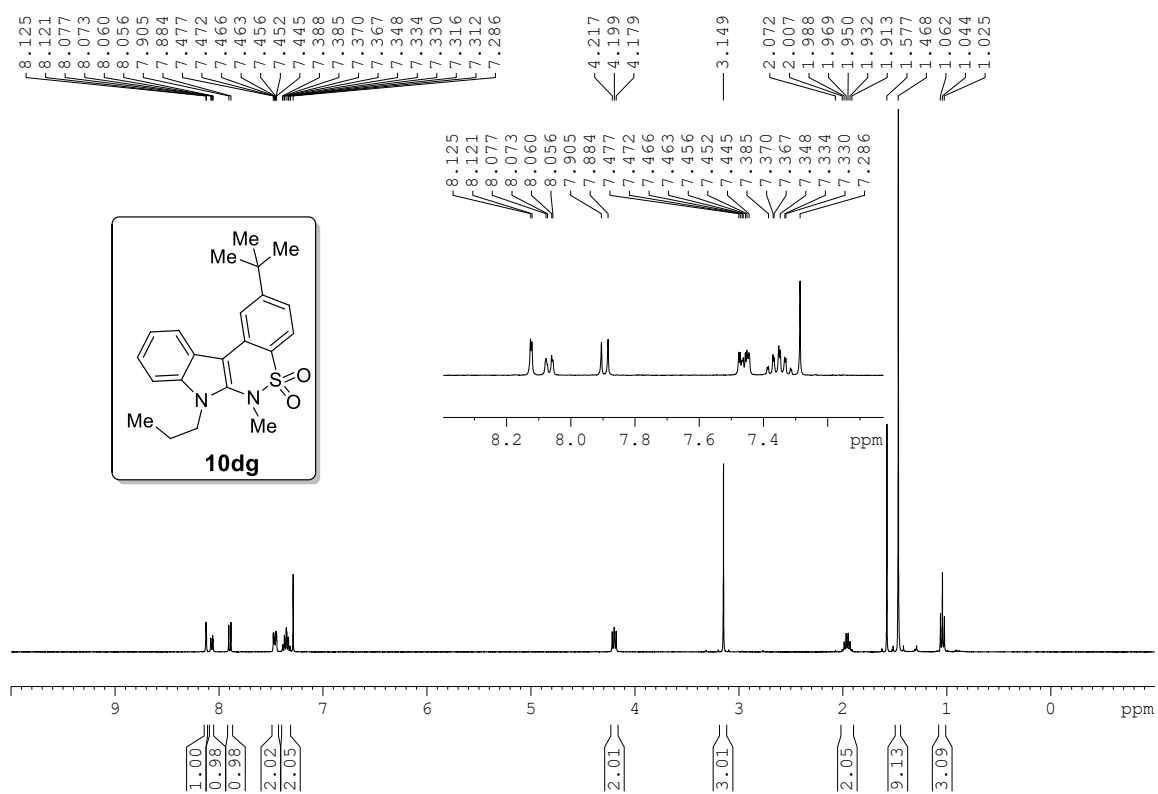

**Figure S119.**  $^1\text{H}$  NMR spectrum of compound **10dg**

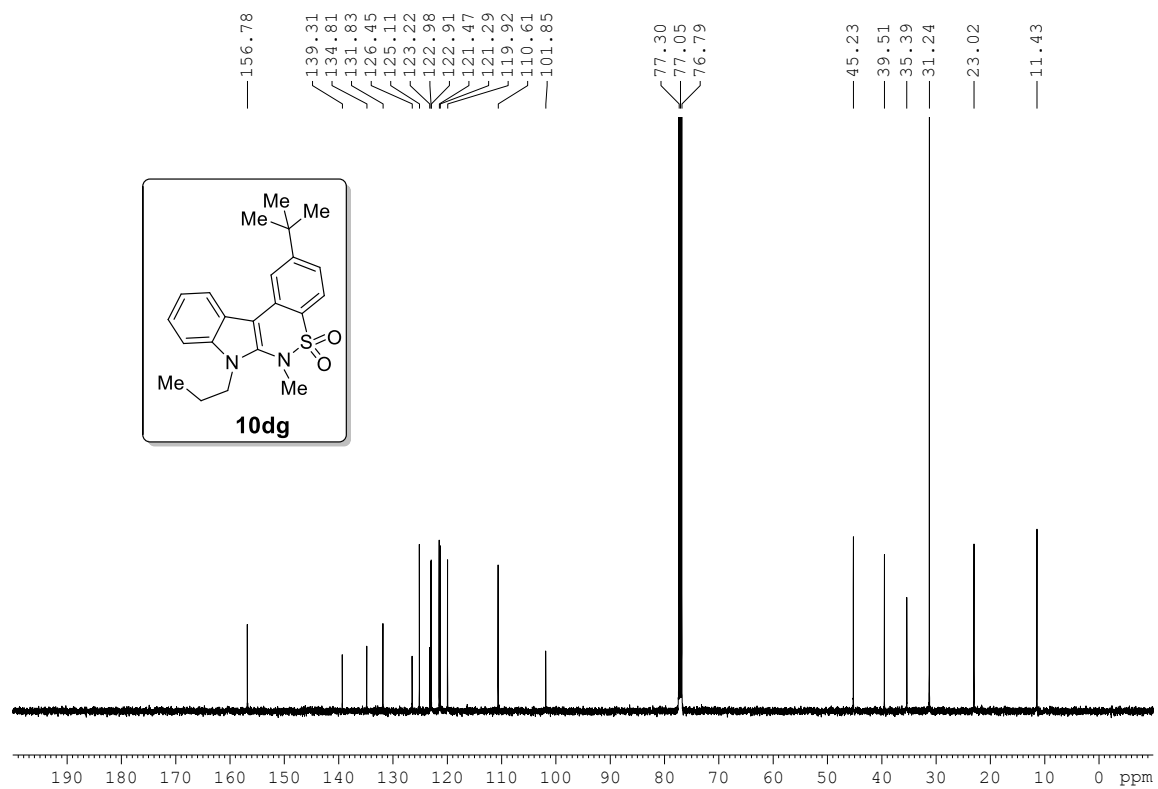

**Figure S120.**  $^{13}\text{C}\{^1\text{H}\}$  NMR spectrum of compound **10dg**

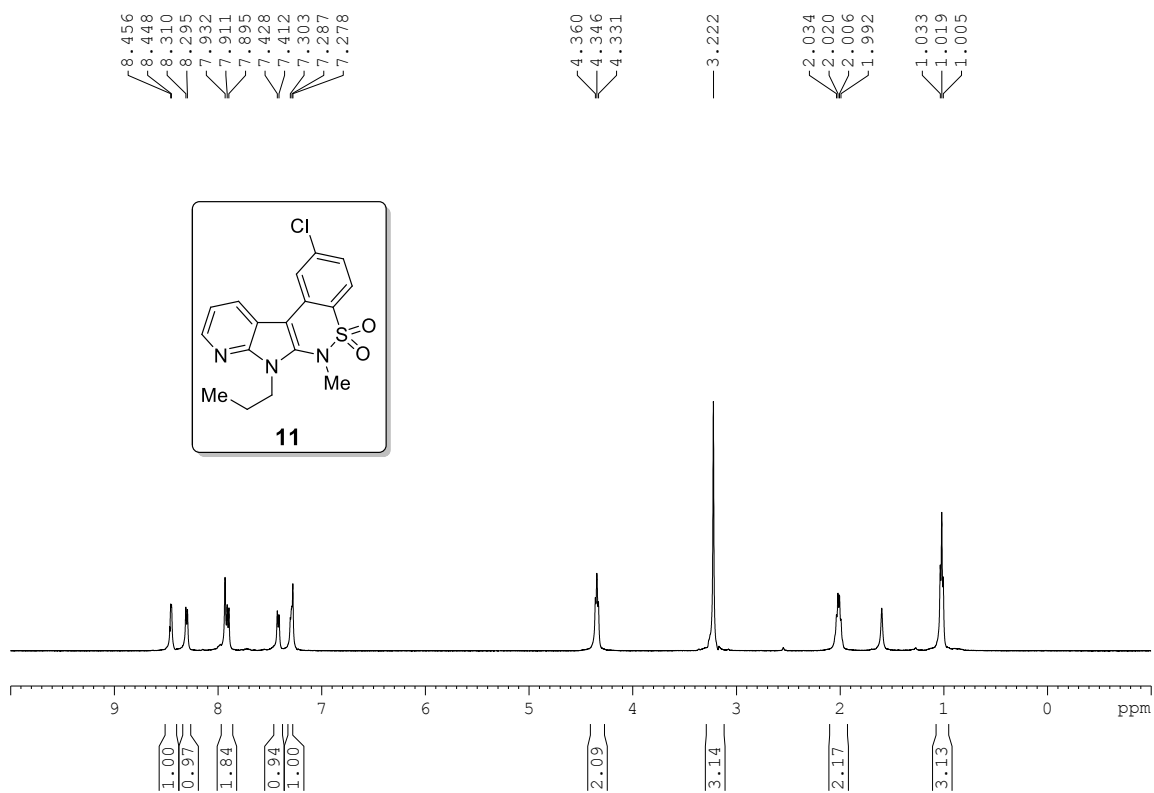

**Figure S121.**  $^1\text{H}$  NMR spectrum of compound **11**

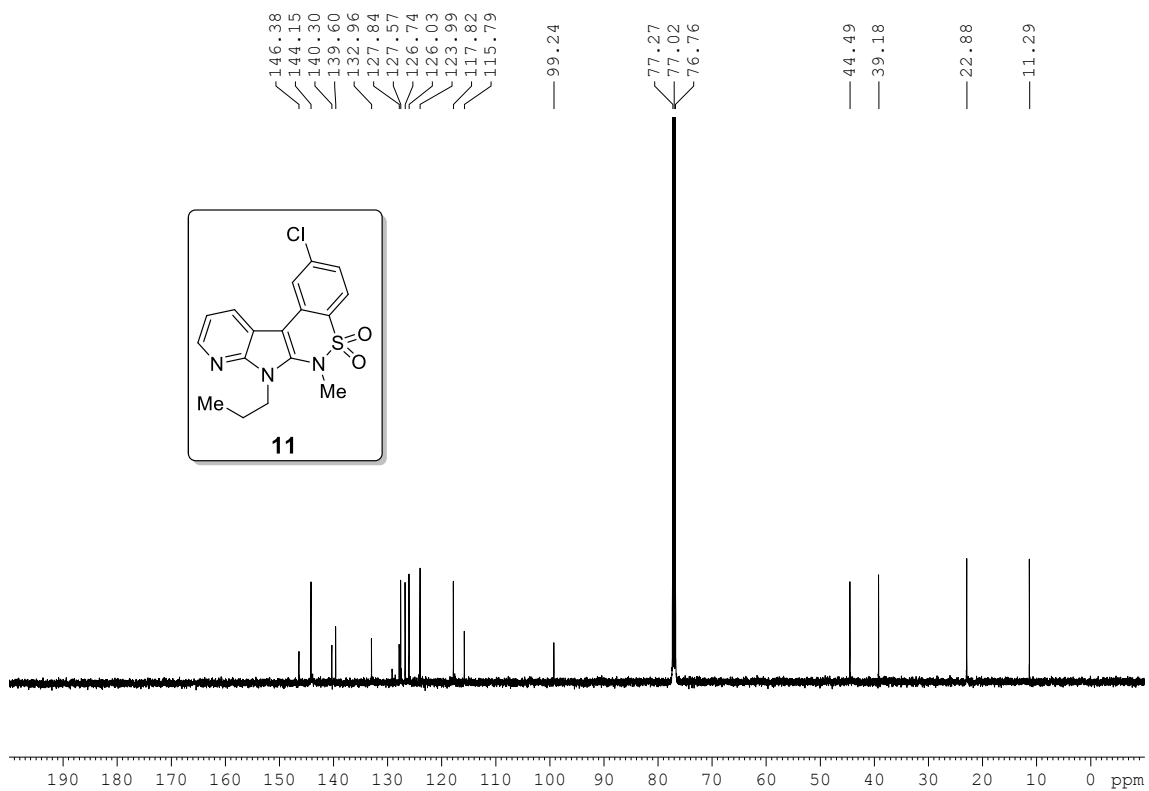

**Figure S122.**  $^{13}\text{C}\{^1\text{H}\}$  NMR spectrum of compound **11**

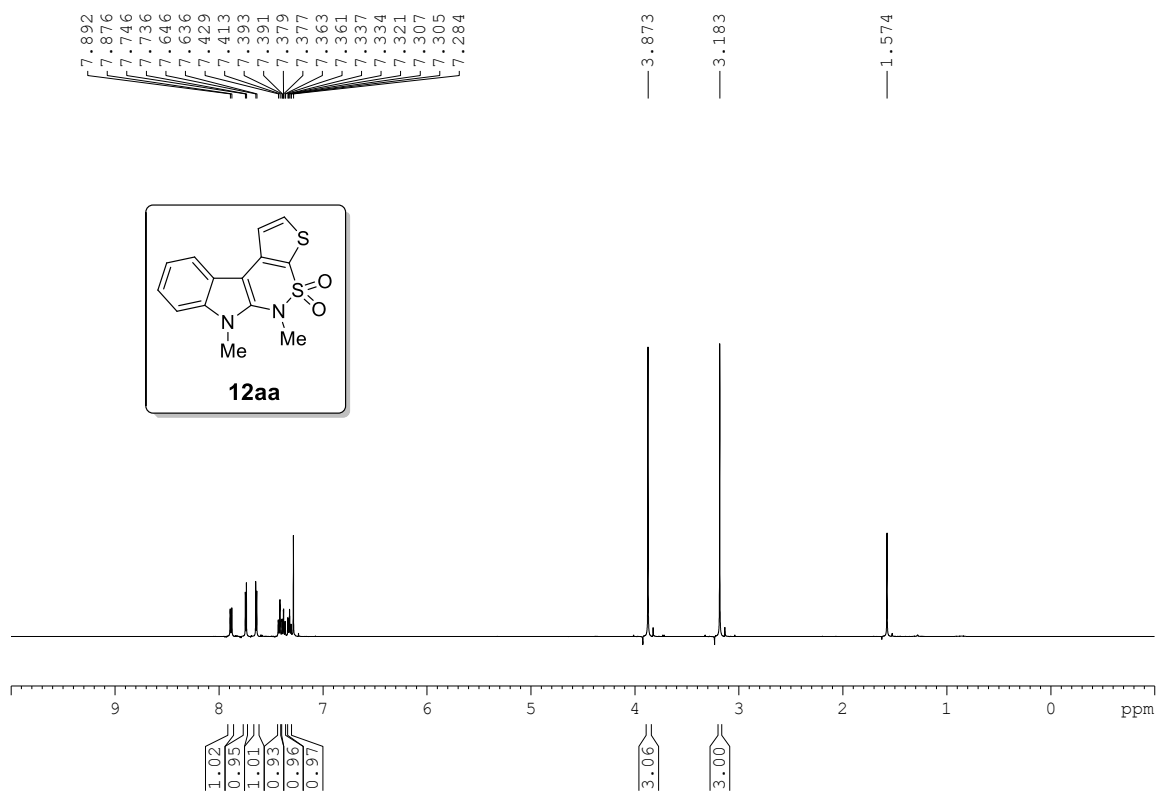

**Figure S123.**  $^1\text{H}$  NMR spectrum of compound **12aa**

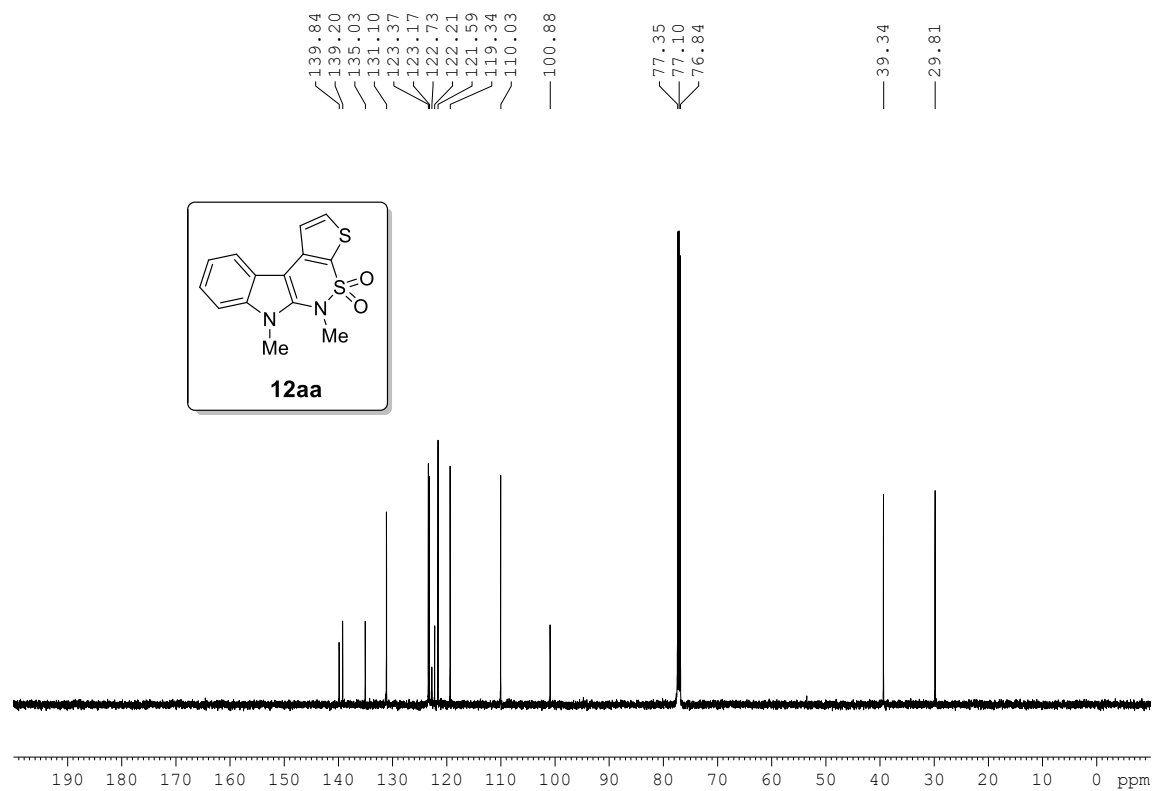

**Figure S124.**  $^{13}\text{C}\{^1\text{H}\}$  NMR spectrum of compound **12aa**

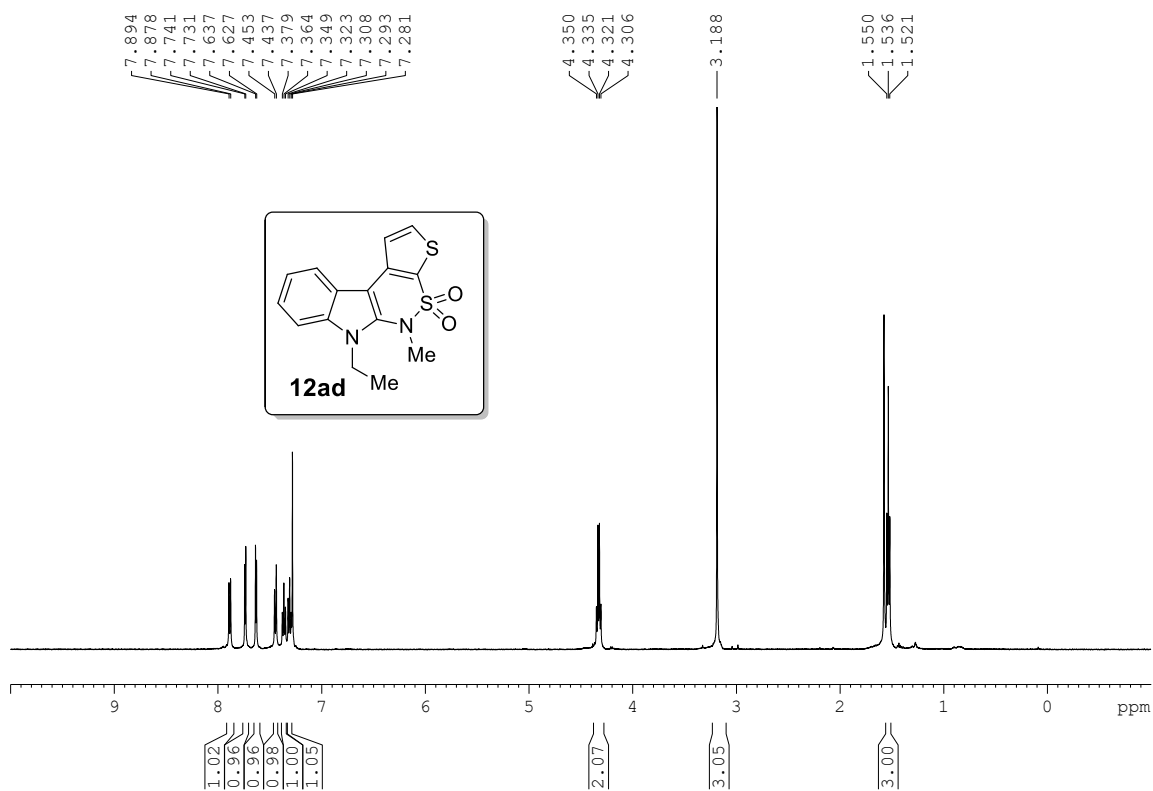

**Figure S125.** <sup>1</sup>H NMR spectrum of compound **12ad**

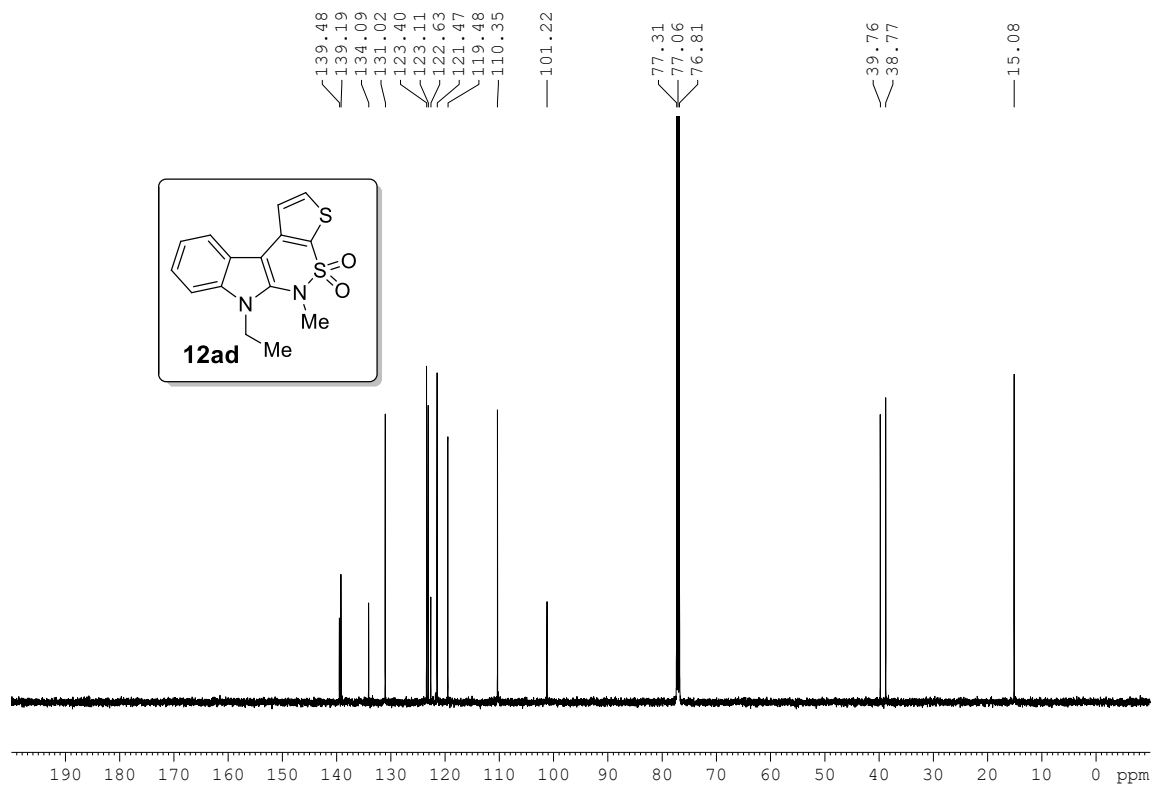

**Figure S126.** <sup>13</sup>C {<sup>1</sup>H} NMR spectrum of compound **12ad**

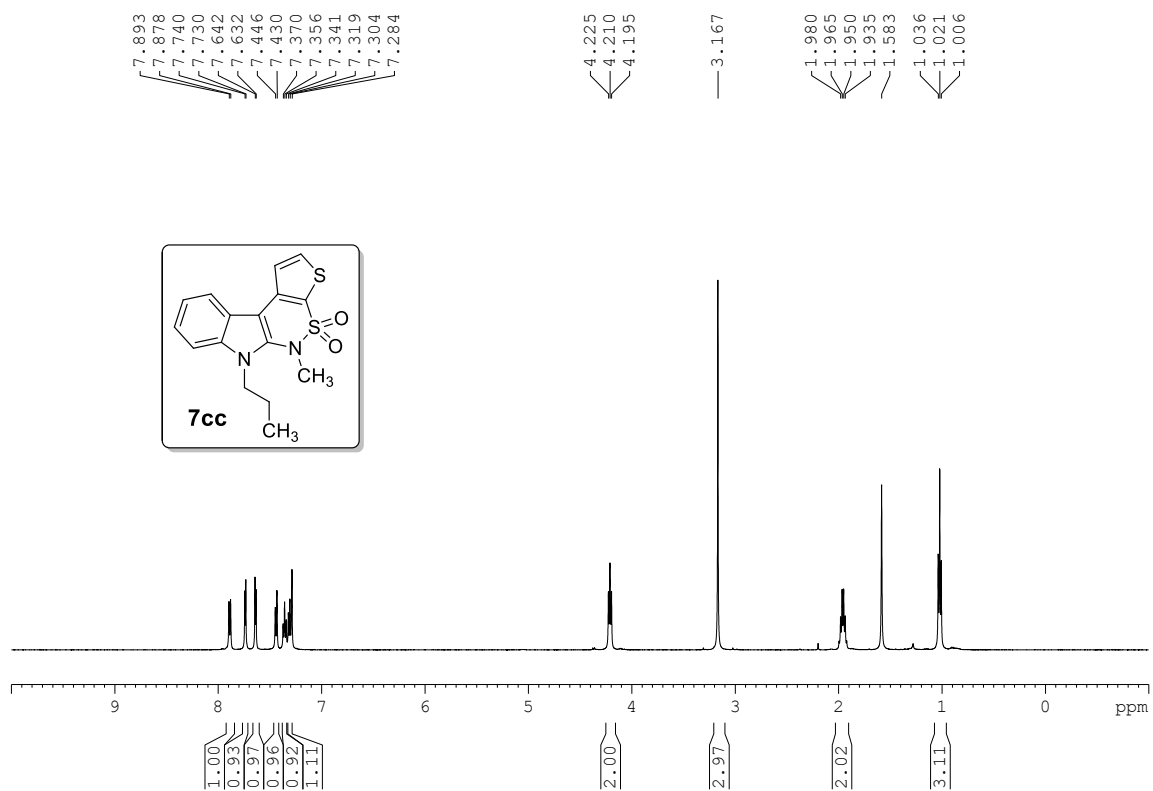

**Figure S127.** <sup>1</sup>H NMR spectrum of compound 12ag

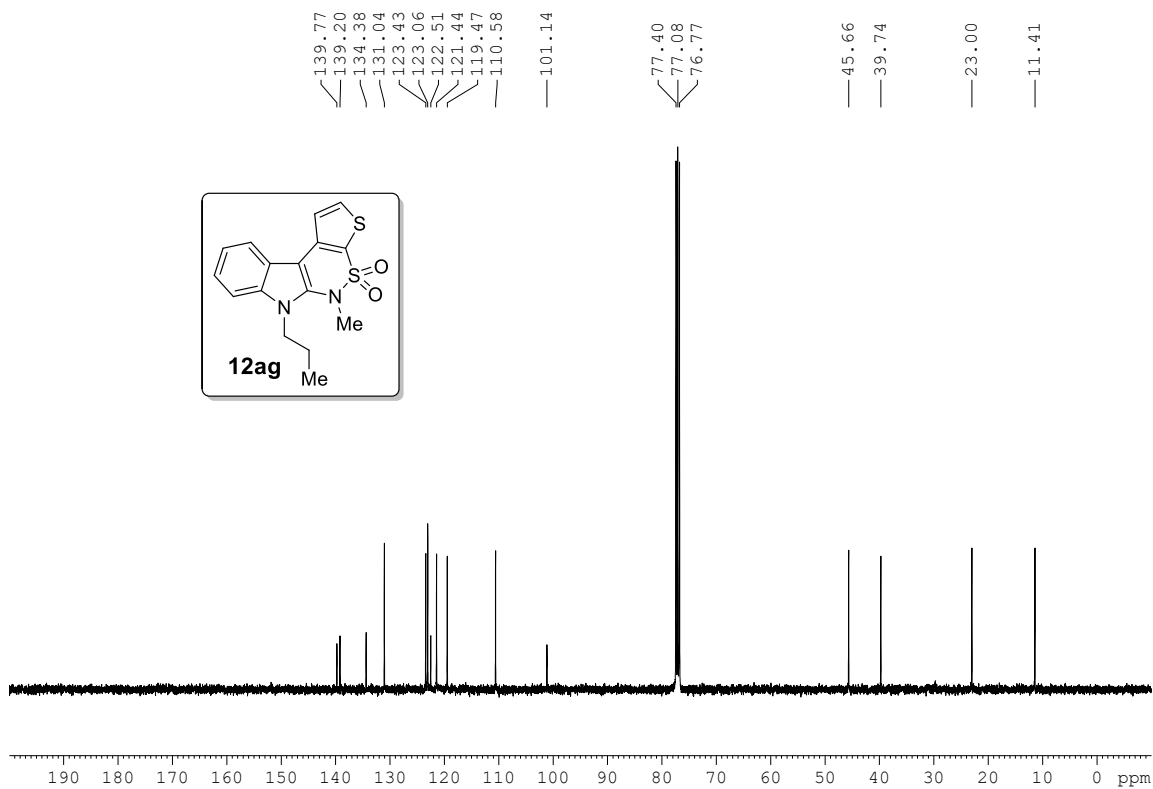

**Figure S128.** <sup>13</sup>C {<sup>1</sup>H} NMR spectrum of compound 12ag



# Display Report

## Analysis Info

Analysis Name E:\2021-data\PROF.KCK\SEPT\SAK-4.d  
Method tune\_low.m  
Sample Name SAK-4  
Comment

Acquisition Date 14-09-2021 13:01:44  
Operator BDAL  
Instrument maXis 255552.10138

## Acquisition Parameter

|             |            |                      |          |                  |           |
|-------------|------------|----------------------|----------|------------------|-----------|
| Source Type | ESI        | Ion Polarity         | Positive | Set Nebulizer    | 0.3 Bar   |
| Focus       | Not active | Set Capillary        | 4000 V   | Set Dry Heater   | 180 °C    |
| Scan Begin  | 50 m/z     | Set End Plate Offset | -500 V   | Set Dry Gas      | 4.0 l/min |
| Scan End    | 1500 m/z   | Set Charging Voltage | 0 V      | Set Divert Valve | Waste     |
|             |            | Set Corona           | 0 nA     | Set APCI Heater  | 0 °C      |

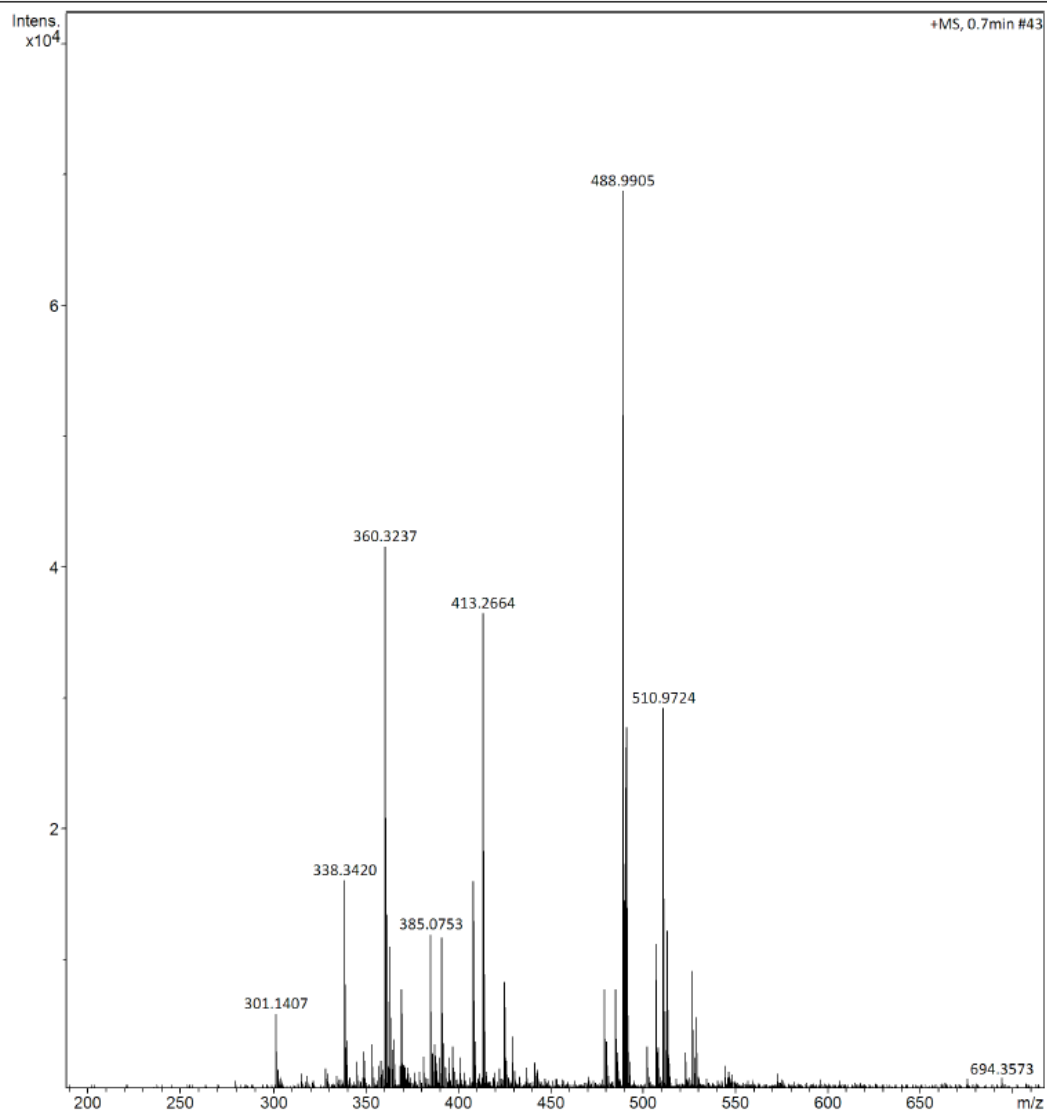

**Figure S129.** HRMS (ESI) of compound **5af**

# Display Report

## Analysis Info

Analysis Name E:\2021-data\PROF.KCK\JULY-2021\SAK-286R.d  
Method tune\_low\_PosR.m  
Sample Name SAK-286R  
Comment

Acquisition Date 03-07-2021 11:47:34

Operator BDAL  
Instrument maXis 255552.10138

## Acquisition Parameter

|             |            |                      |          |                  |           |
|-------------|------------|----------------------|----------|------------------|-----------|
| Source Type | ESI        | Ion Polarity         | Positive | Set Nebulizer    | 0.3 Bar   |
| Focus       | Not active | Set Capillary        | 2800 V   | Set Dry Heater   | 250 °C    |
| Scan Begin  | 300 m/z    | Set End Plate Offset | -500 V   | Set Dry Gas      | 4.0 l/min |
| Scan End    | 2500 m/z   | Set Charging Voltage | 0 V      | Set Divert Valve | Waste     |
|             |            | Set Corona           | 0 nA     | Set APCI Heater  | 0 °C      |

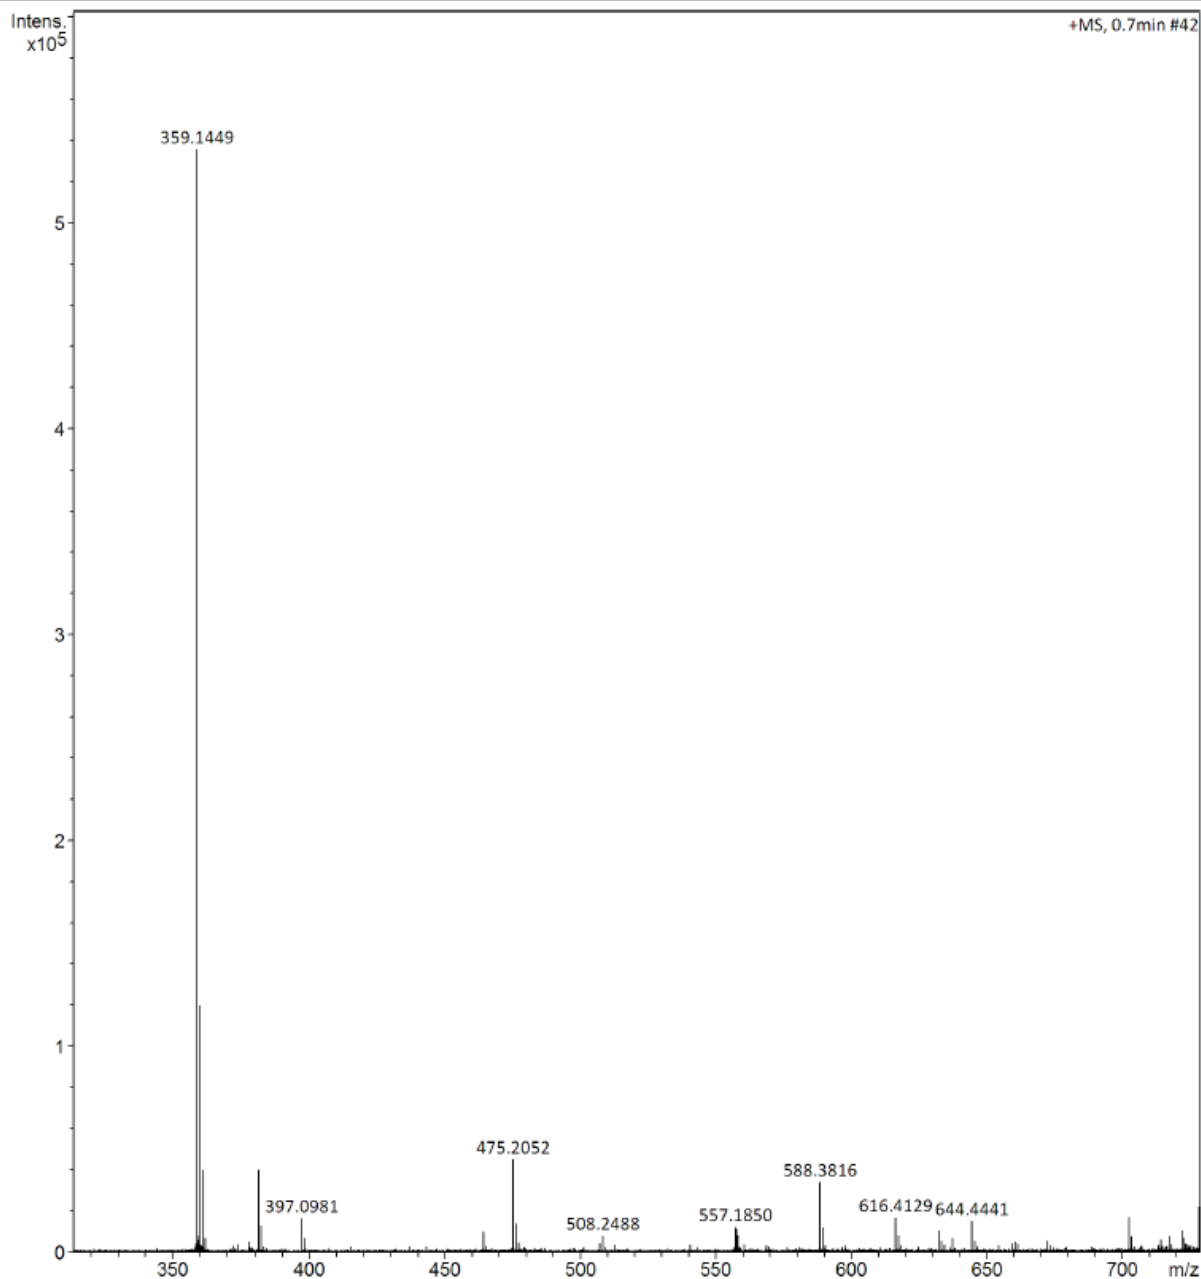

Figure S130. HRMS (ESI) of compound **9ae**

## Display Report

### Analysis Info

Analysis Name E:\2021-data\PROF.KCK\JULY-2021\RAJ-176.d  
Method tune\_low\_Pos-R2.m  
Sample Name RAJ-176  
Comment

Acquisition Date 03-07-2021 12:00:14

Operator BDAL  
Instrument maXis 255552.10138

### Acquisition Parameter

|             |            |                      |          |                  |           |
|-------------|------------|----------------------|----------|------------------|-----------|
| Source Type | ESI        | Ion Polarity         | Positive | Set Nebulizer    | 0.3 Bar   |
| Focus       | Not active | Set Capillary        | 2800 V   | Set Dry Heater   | 180 °C    |
| Scan Begin  | 50 m/z     | Set End Plate Offset | -500 V   | Set Dry Gas      | 4.0 l/min |
| Scan End    | 2580 m/z   | Set Charging Voltage | 0 V      | Set Divert Valve | Waste     |
|             |            | Set Corona           | 0 nA     | Set APCI Heater  | 0 °C      |

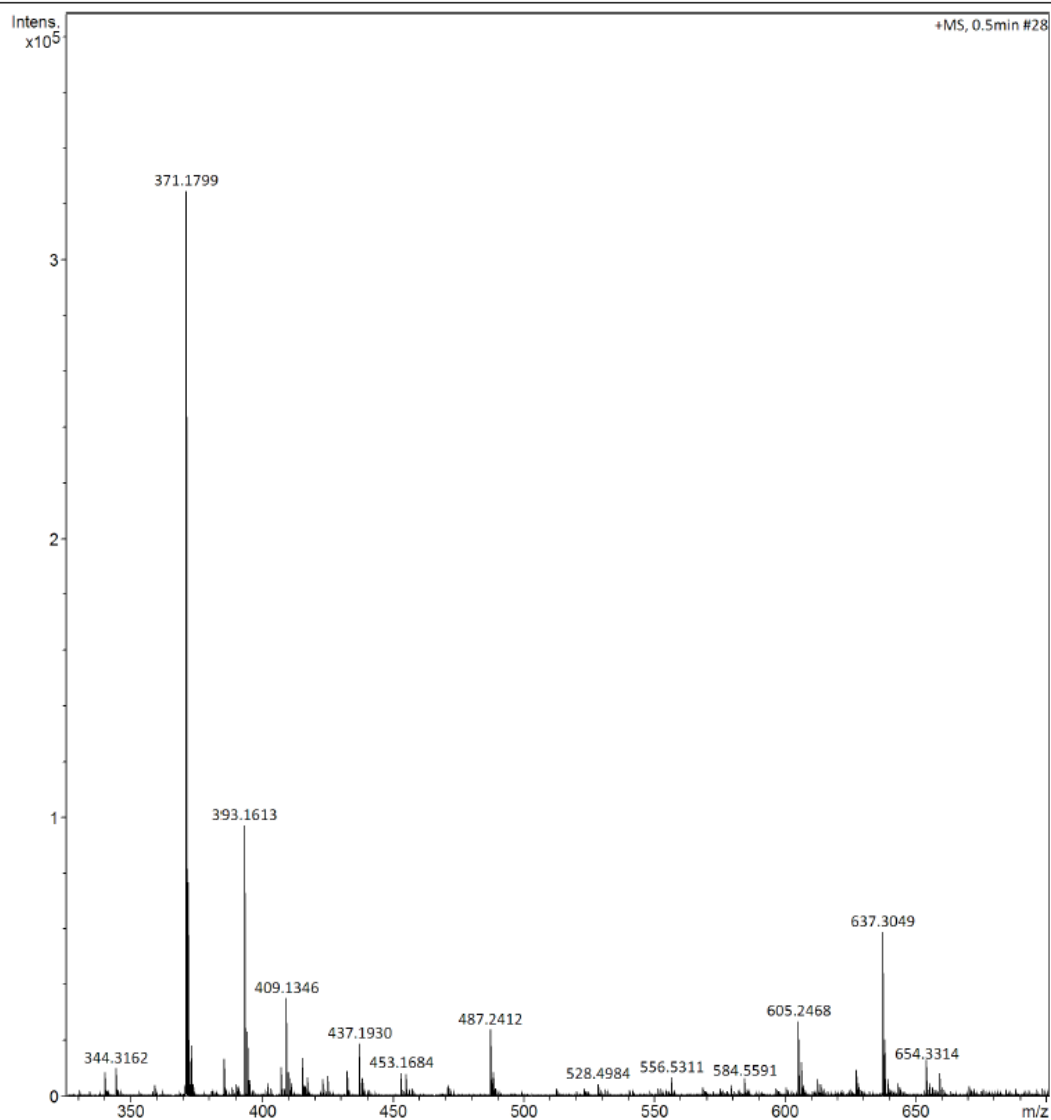

Figure S131. HRMS (ESI) of compound 9bi

## Display Report

|                      |                                                          |                  |                     |
|----------------------|----------------------------------------------------------|------------------|---------------------|
| <b>Analysis Info</b> |                                                          | Acquisition Date | 2/9/2021 4:24:06 PM |
| Analysis Name        | D:\Data\1\1\1\Finaltest\2021\PROF.KCK\FEB\RAJ-THIO-MR1.d | Operator         | BDAL@DE             |
| Method               | tune_low.m                                               | Instrument       | maXis 10138         |
| Sample Name          | RAJ-THIO-MR1                                             |                  |                     |
| Comment              |                                                          |                  |                     |

|                              |            |                       |           |                  |           |
|------------------------------|------------|-----------------------|-----------|------------------|-----------|
| <b>Acquisition Parameter</b> |            |                       |           |                  |           |
| Source Type                  | ESI        | Ion Polarity          | Positive  | Set Nebulizer    | 0.3 Bar   |
| Focus                        | Not active | Set Capillary         | 4000 V    | Set Dry Heater   | 180 °C    |
| Scan Begin                   | 50 m/z     | Set End Plate Offset  | -500 V    | Set Dry Gas      | 4.0 l/min |
| Scan End                     | 1500 m/z   | Set Collision Cell RF | 350.0 Vpp | Set Divert Valve | Waste     |

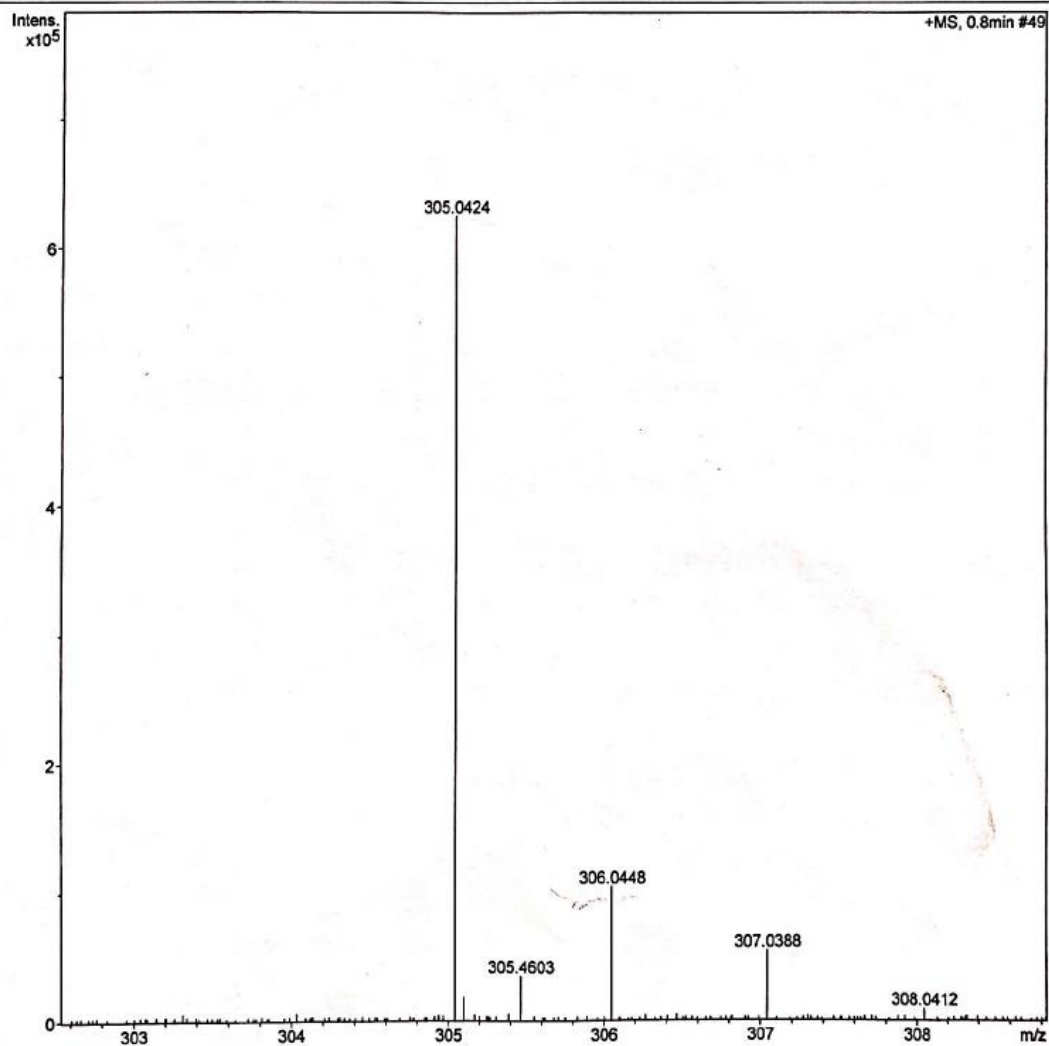

Figure S132. HRMS (ESI) of compound 12aa

## Display Report

### Analysis Info

Analysis Name D:\Data\1\Data\Finaltest\2021\PROF.KCK\FEB\RAJ-270.d  
Method tune\_low.m  
Sample Name RAJ-270  
Comment

Acquisition Date 2/11/2021 2:39:19 PM

Operator BDAL@DE  
Instrument maXis 10138

### Acquisition Parameter

|             |            |                       |           |                  |           |
|-------------|------------|-----------------------|-----------|------------------|-----------|
| Source Type | ESI        | Ion Polarity          | Positive  | Set Nebulizer    | 0.3 Bar   |
| Focus       | Not active | Set Capillary         | 4200 V    | Set Dry Heater   | 180 °C    |
| Scan Begin  | 50 m/z     | Set End Plate Offset  | -500 V    | Set Dry Gas      | 6.0 l/min |
| Scan End    | 1500 m/z   | Set Collision Cell RF | 350.0 Vpp | Set Divert Valve | Waste     |

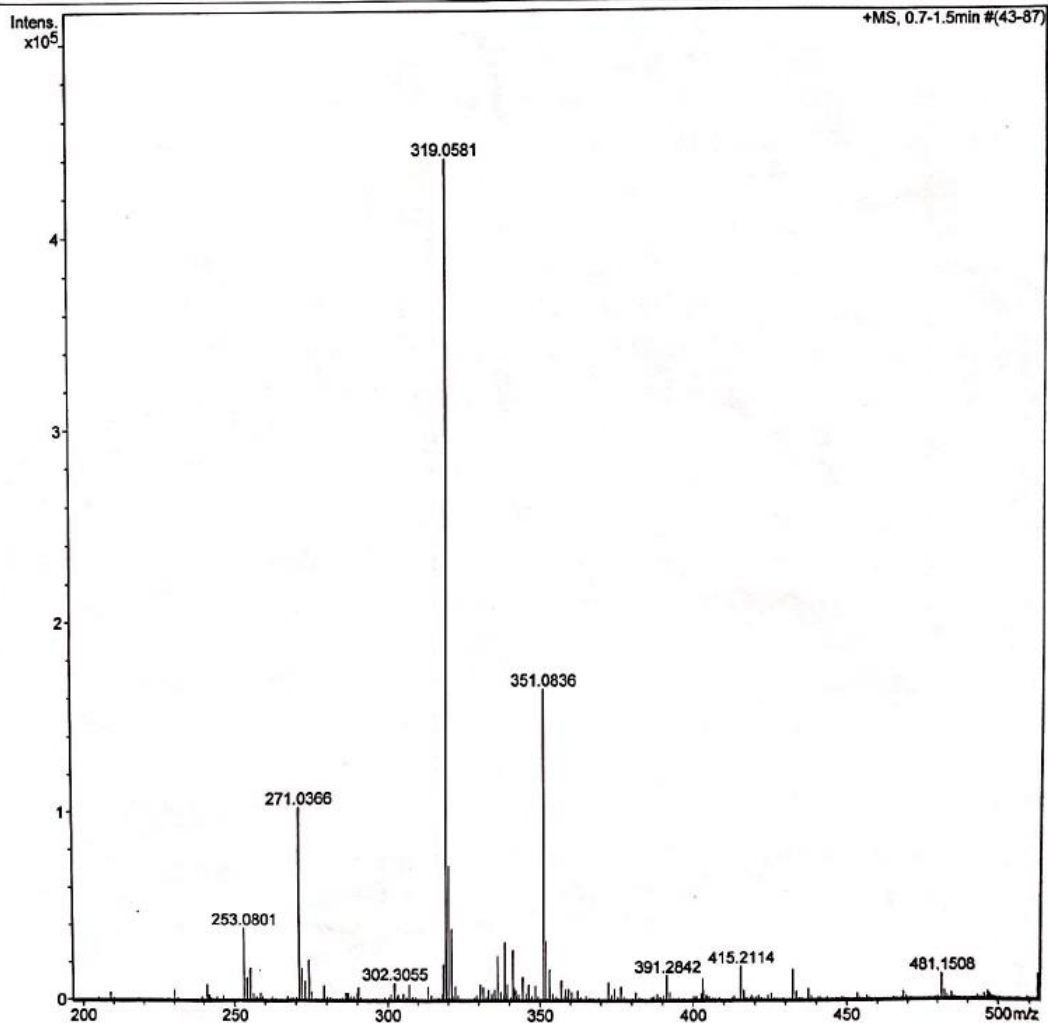

Figure S133. HRMS (ESI) of compound 12ad

## References

- (1) Sandeep, K.; Reddy, A. S.; Swamy, K. C. K. Cu(I) catalysed annulation of isothiocyanates/isocyanates with 2-iodo-sulfonamides: synthesis of benzodithiazines, benzothiadiazinones, benzothiazinylidene-anilines and benzothiazolyidene-anilines. *Org. Biomol. Chem.* **2019**, *17*, 6880 (and references cited therein).
- (2) Barange, D. K.; Kavala, V.; Kuo, C. -W.; Wang, C.-C.; Rajawinslin, R. R.; Donala, J.; Yao, C. -Fa. Regioselective synthesis of thiophene fused sultam derivatives via iodocyclization approach and their application towards triazole linker. *Tetrahedron Lett.* **2014**, *70*, 7598.
- (3) Merlic, C. A.; You, Y.; McInnes, D. M.; Zechman, A. L.; Miller, M. M.; Deng, Q. Benzannulation reactions of Fischer carbene complexes for the synthesis of indolocarbazole. *Tetrahedron* **2001**, *57*, 5199.
